# Supplementary material
Source: PubMed Central journal article supplement (PMC3375946)
Supplement: supp_pp.111.188318_188318supplemental_data_DEF.pdf [file supp_pp.111.188318_188318supplemental_data_DEF.pdf]

**Figure S1.** Integrated linkage map of the cultivated strawberry based on a F<sub>1</sub> progeny derived from the cross between '232' and '1392' showing the map positions (in cM) of the new genes and markers used in this investigation. The six strawberry candidate genes involved in aroma biosynthesis are shown underlined and the two single Mendelian traits,  $\gamma$ -decalactone (HGIII) and mesifurane (HGVII) are shown in bold. Segregation distortion is indicated by means of significance level *P* of the  $\chi^2$  test: \* *P* ≤ 0.05, \*\* *P* ≤ 0.01, \*\*\* *P* ≤ 0.001. The diploid *Fragaria* reference map (adapted from Sargent *et al.*, 2008) is presented on the left with the bin map position of candidate genes and anchor markers.

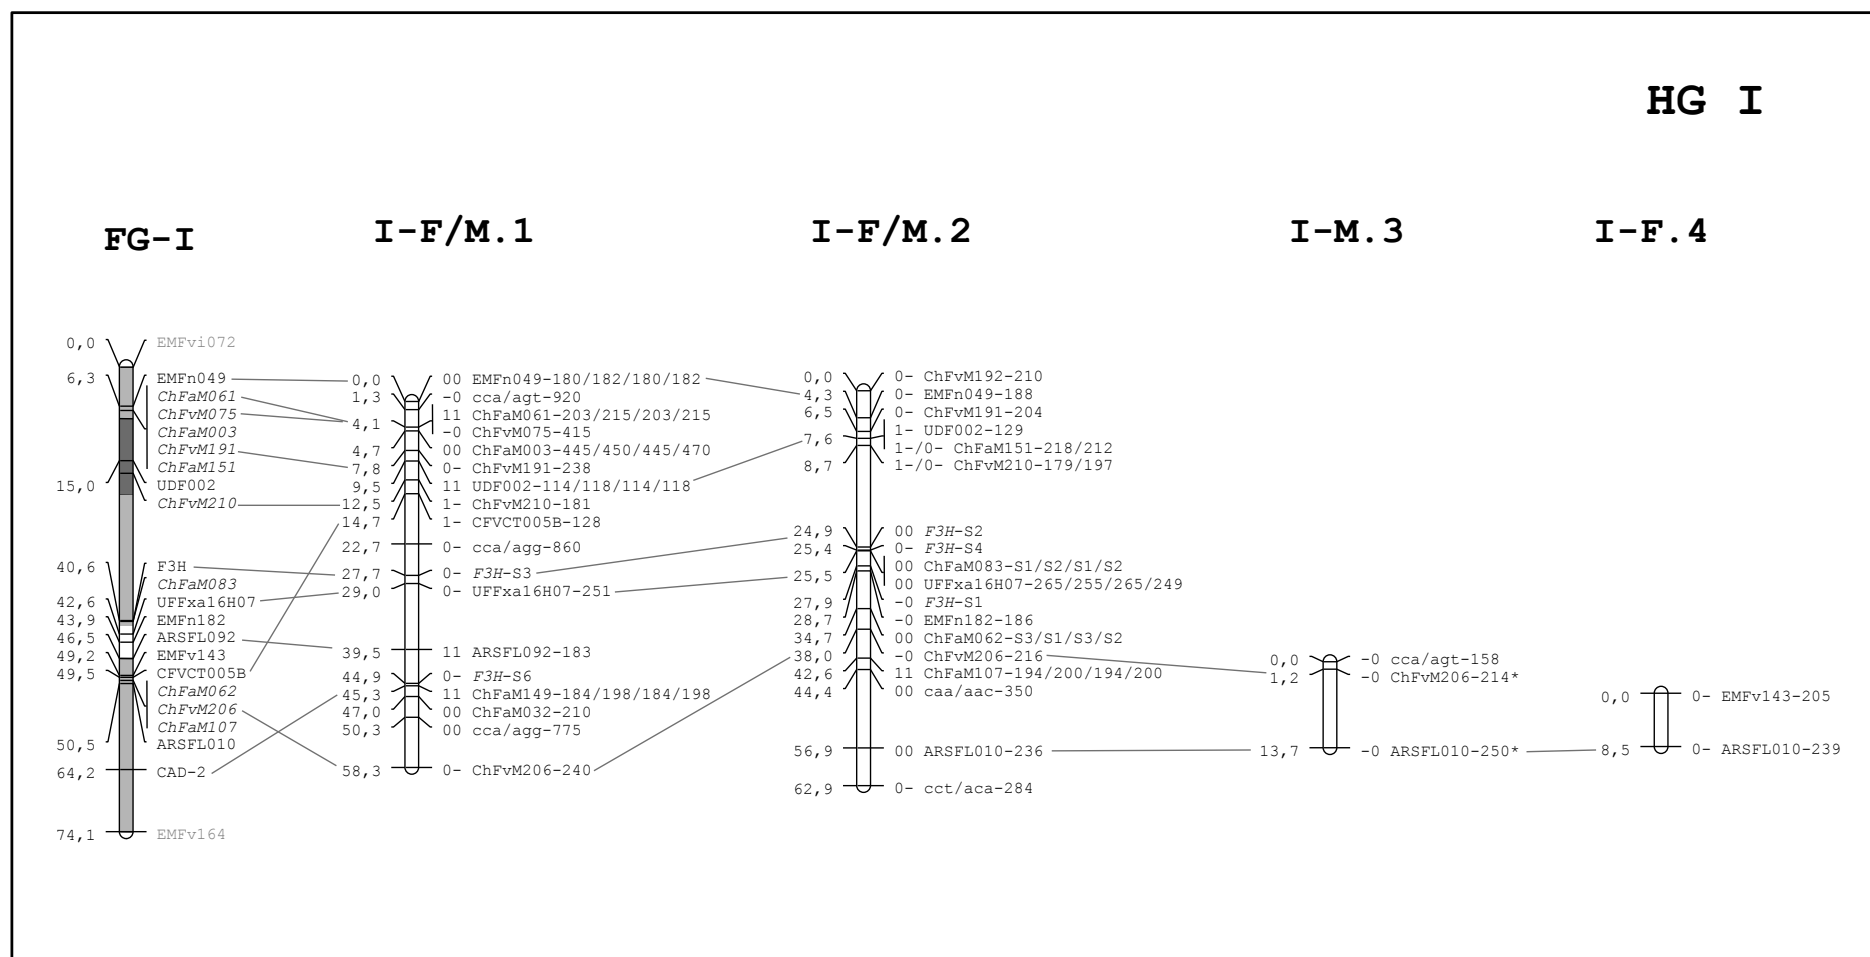



# HG III

## FG-III

## III-F/M.1

## III-F/M.2

## III-F.3

## III-F.4

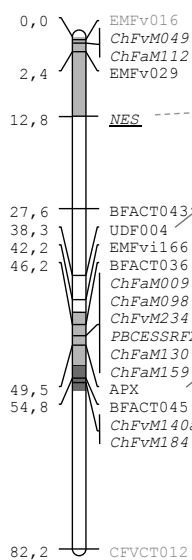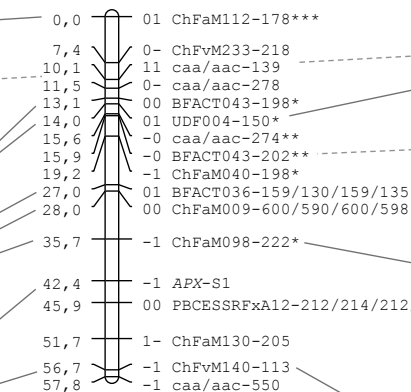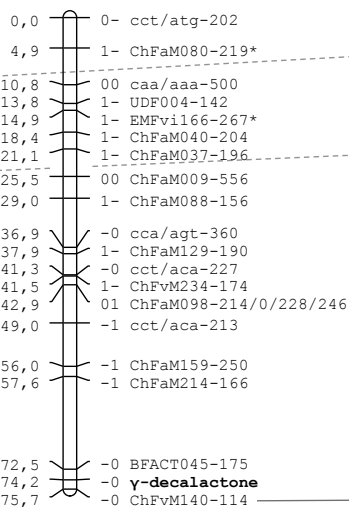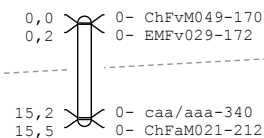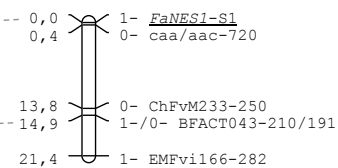

## III-F/M.5

## III-F/M.7

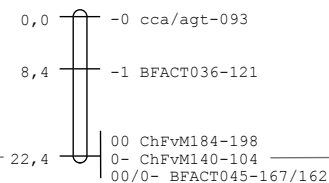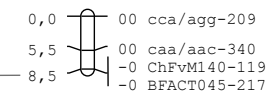

## III-F/M.6

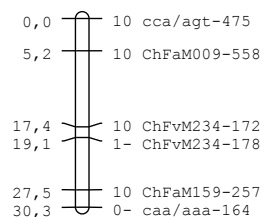

Figure S1. Continued.

# HG IV

## FG-IV

## IV-F/M.1

## IV-F/M.2

## IV-F.3

## IV-F/M.4

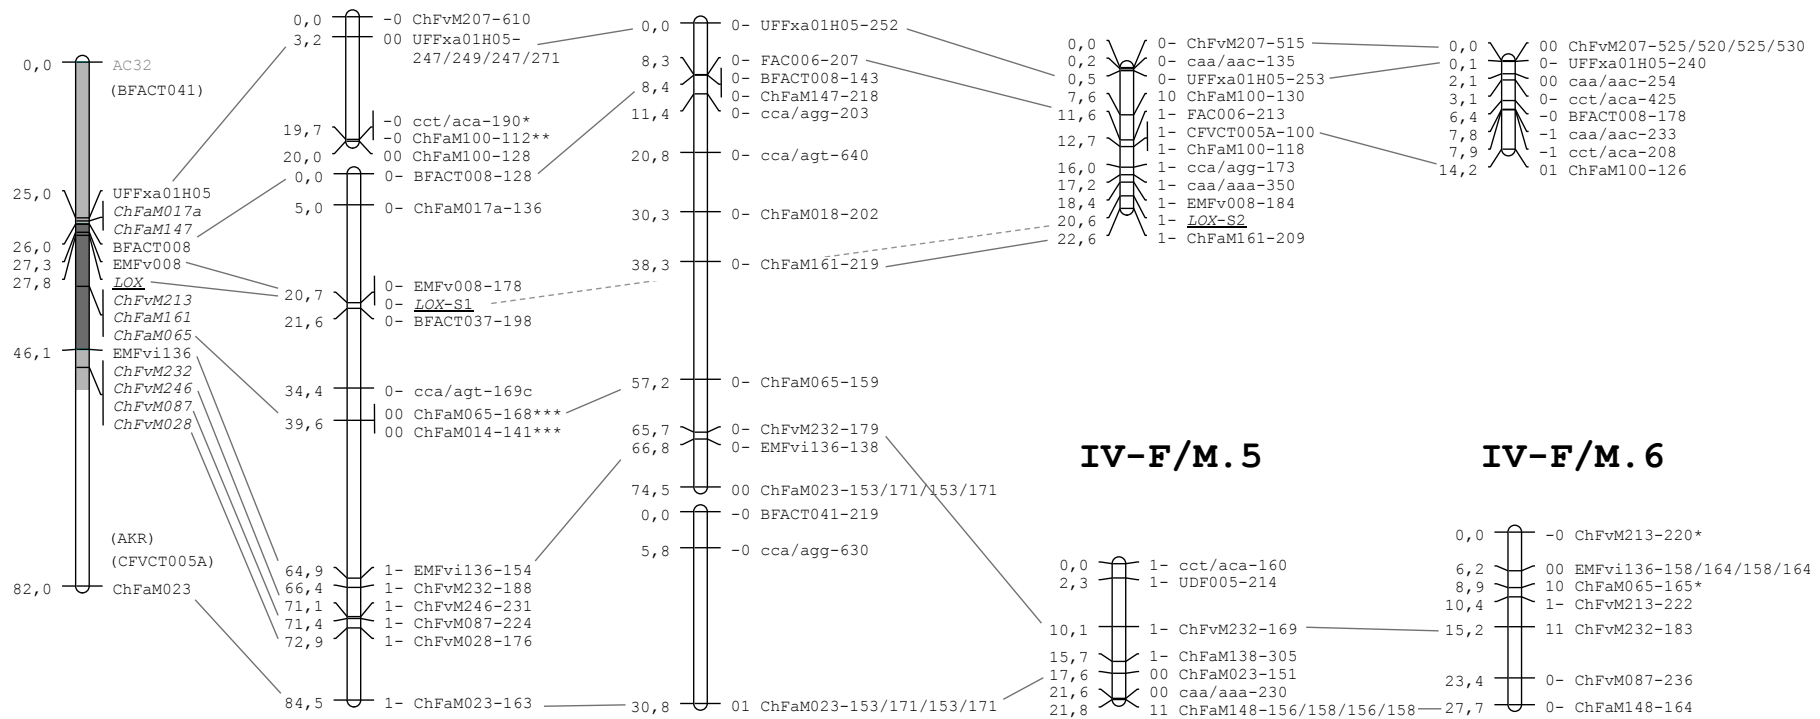

Figure S1. Continued.

# HG V

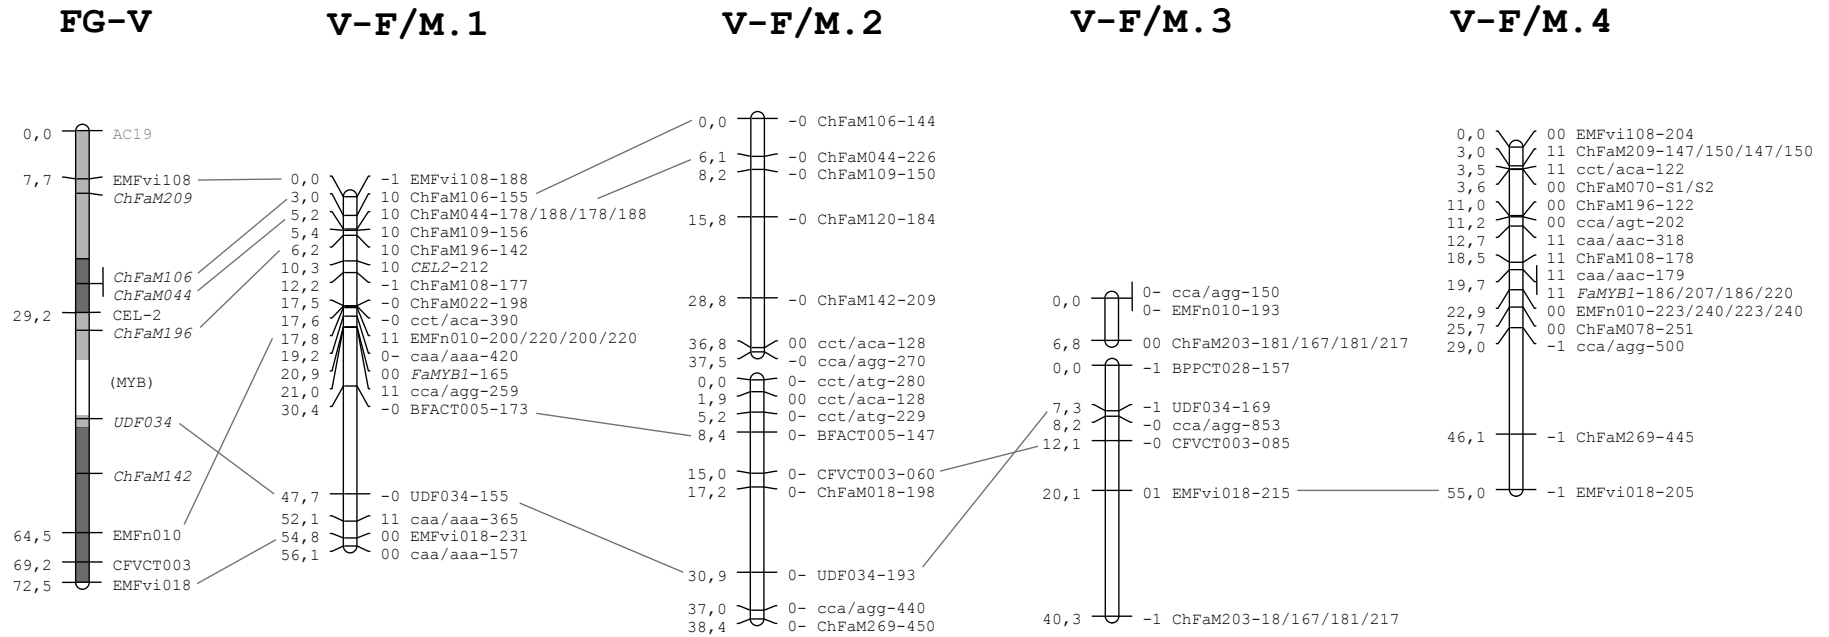

Figure S1. Continued.

# HG VI

## FG-VI

## VI-F/M.1

## VI-M.5

## VI-M.3

## VI-F/M.4

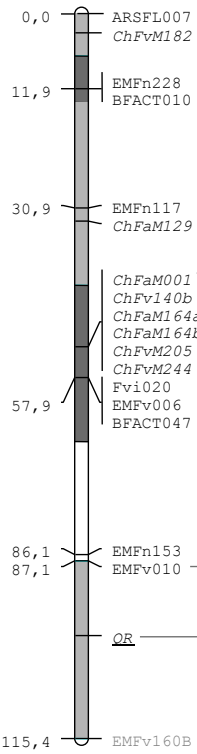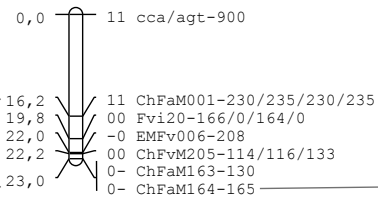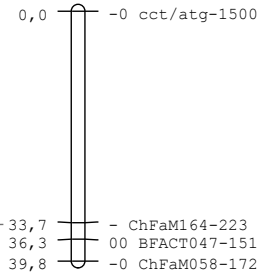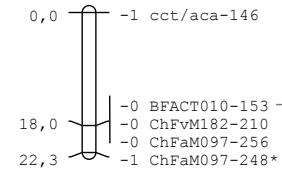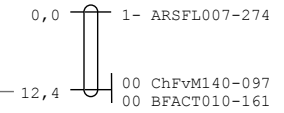

## VI-M.2

## VI-F/M.7

## VI-F.6

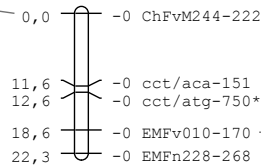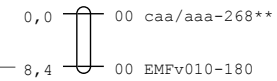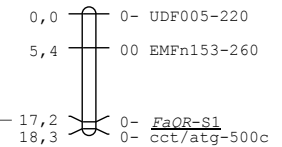

Figure S1. Continued.

# HG VII

## FGVII

## VII-F/M.1

## VII-F/M.2

## VII-F/M.3

## VII-F.4

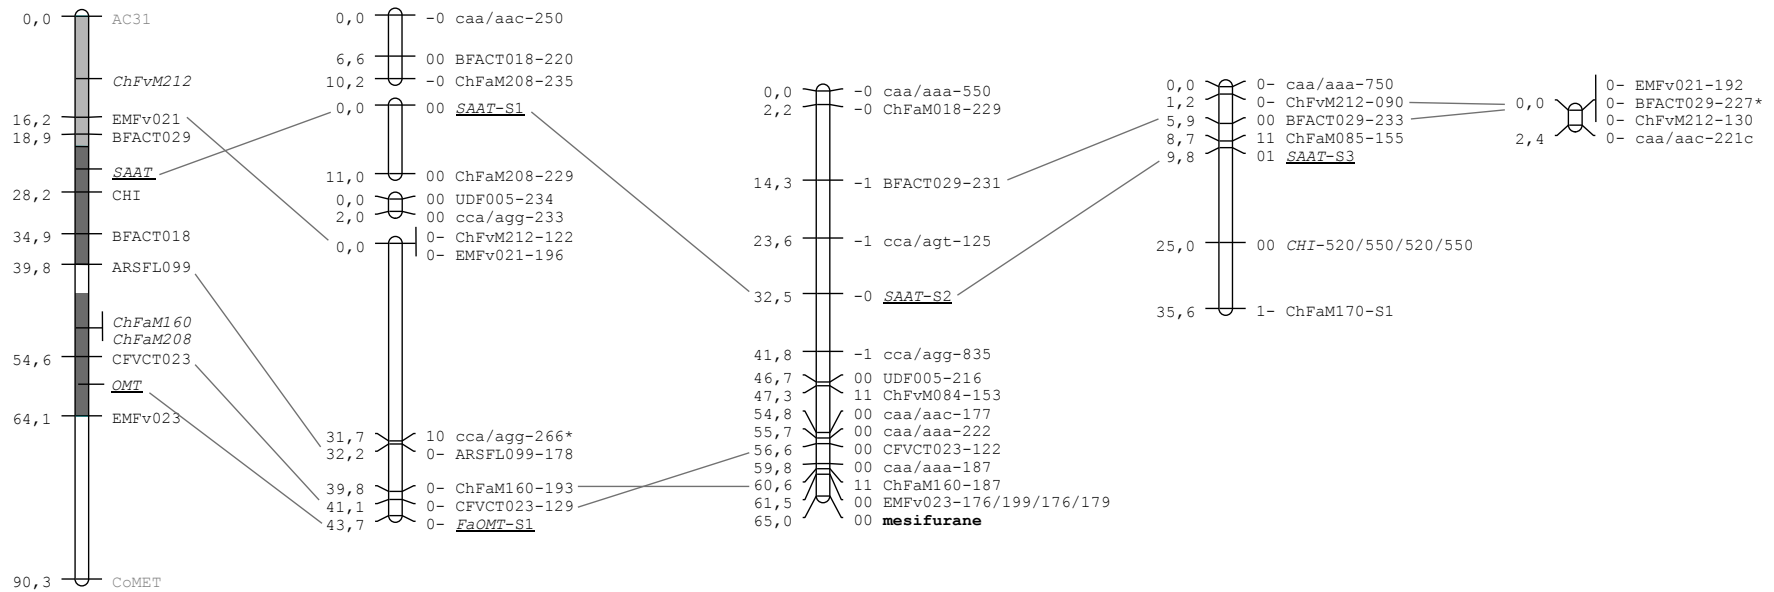

Figure S1. Continued.

**Figure S2.** A, HCA and heat map representation of volatile profiles of each individual in the population during the 4 assessed years. B, Detail of cluster 1. C, Detail of cluster 2. D, Detail of cluster 3. E, Detail of cluster 4.

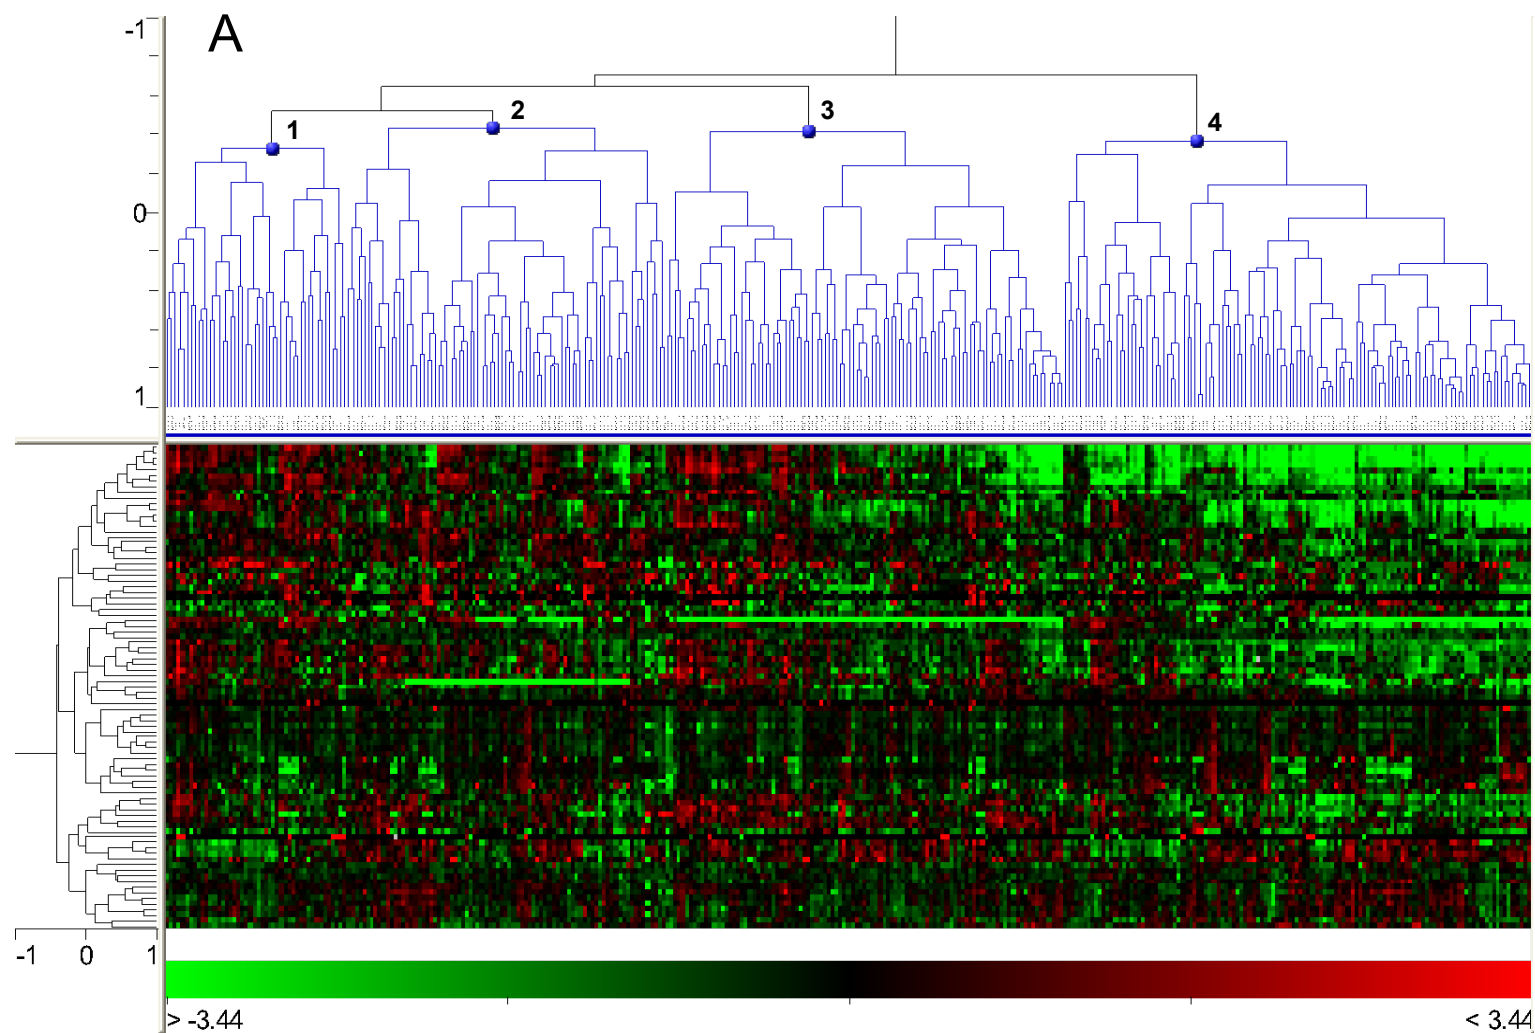



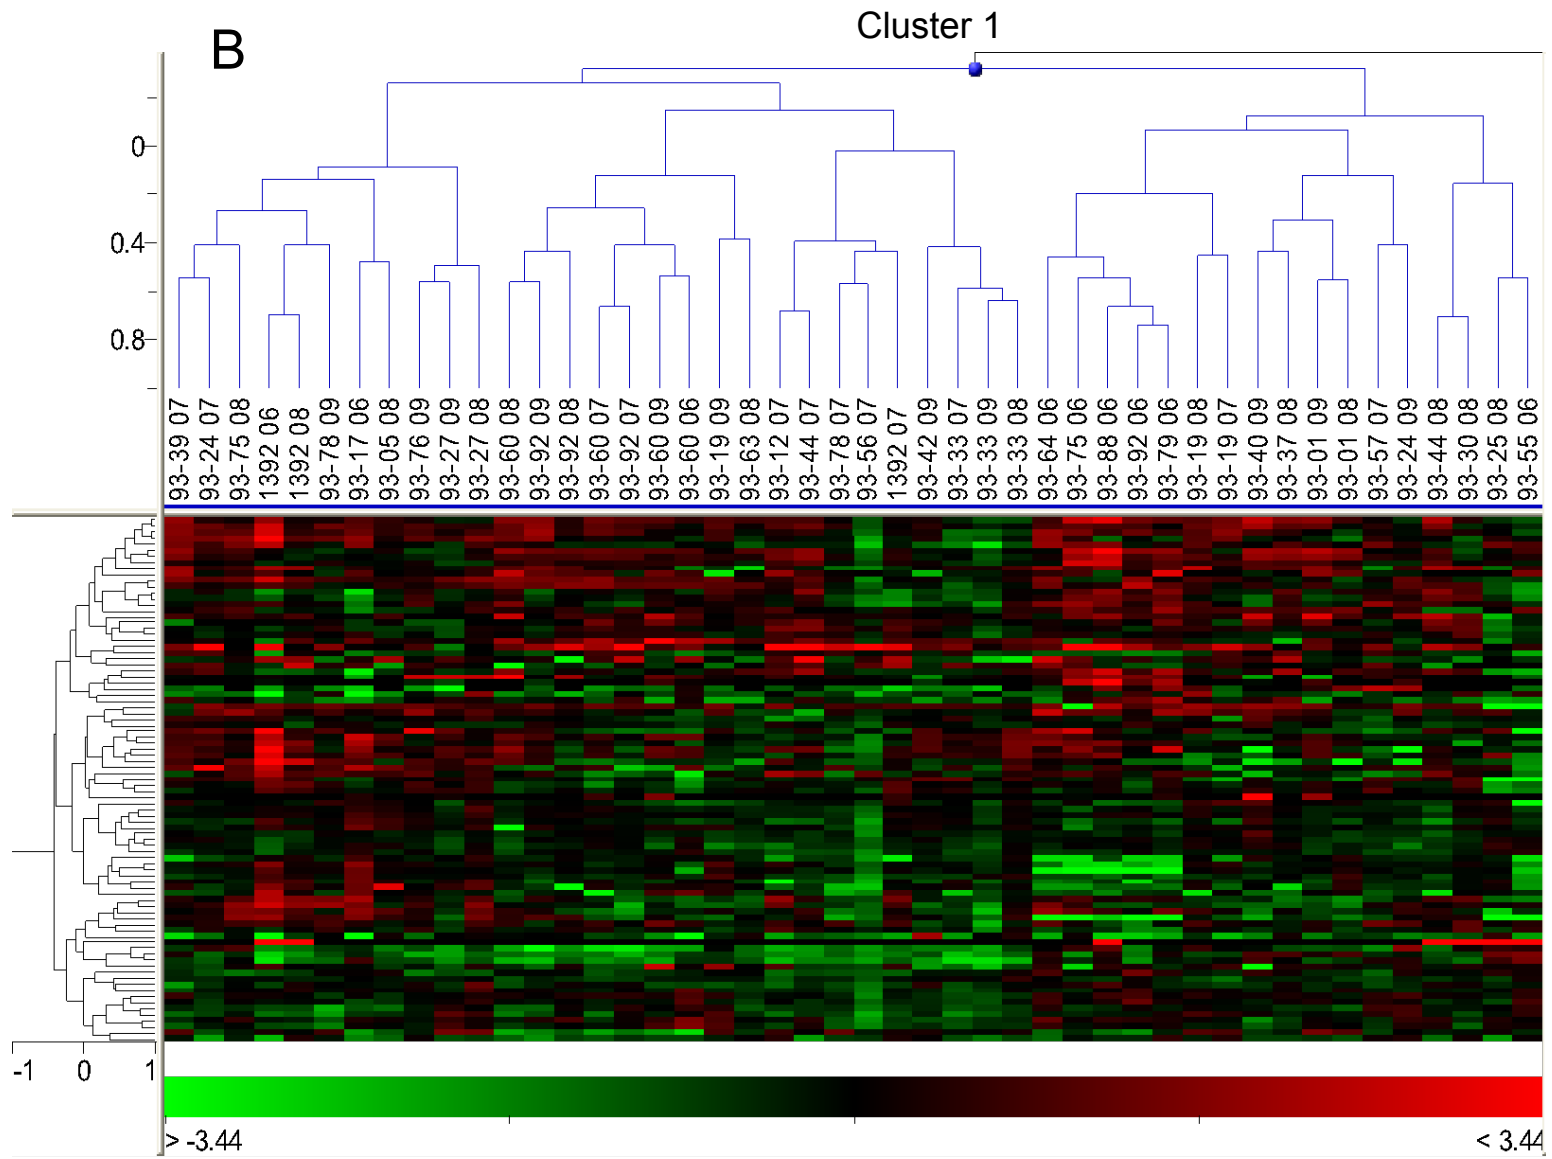

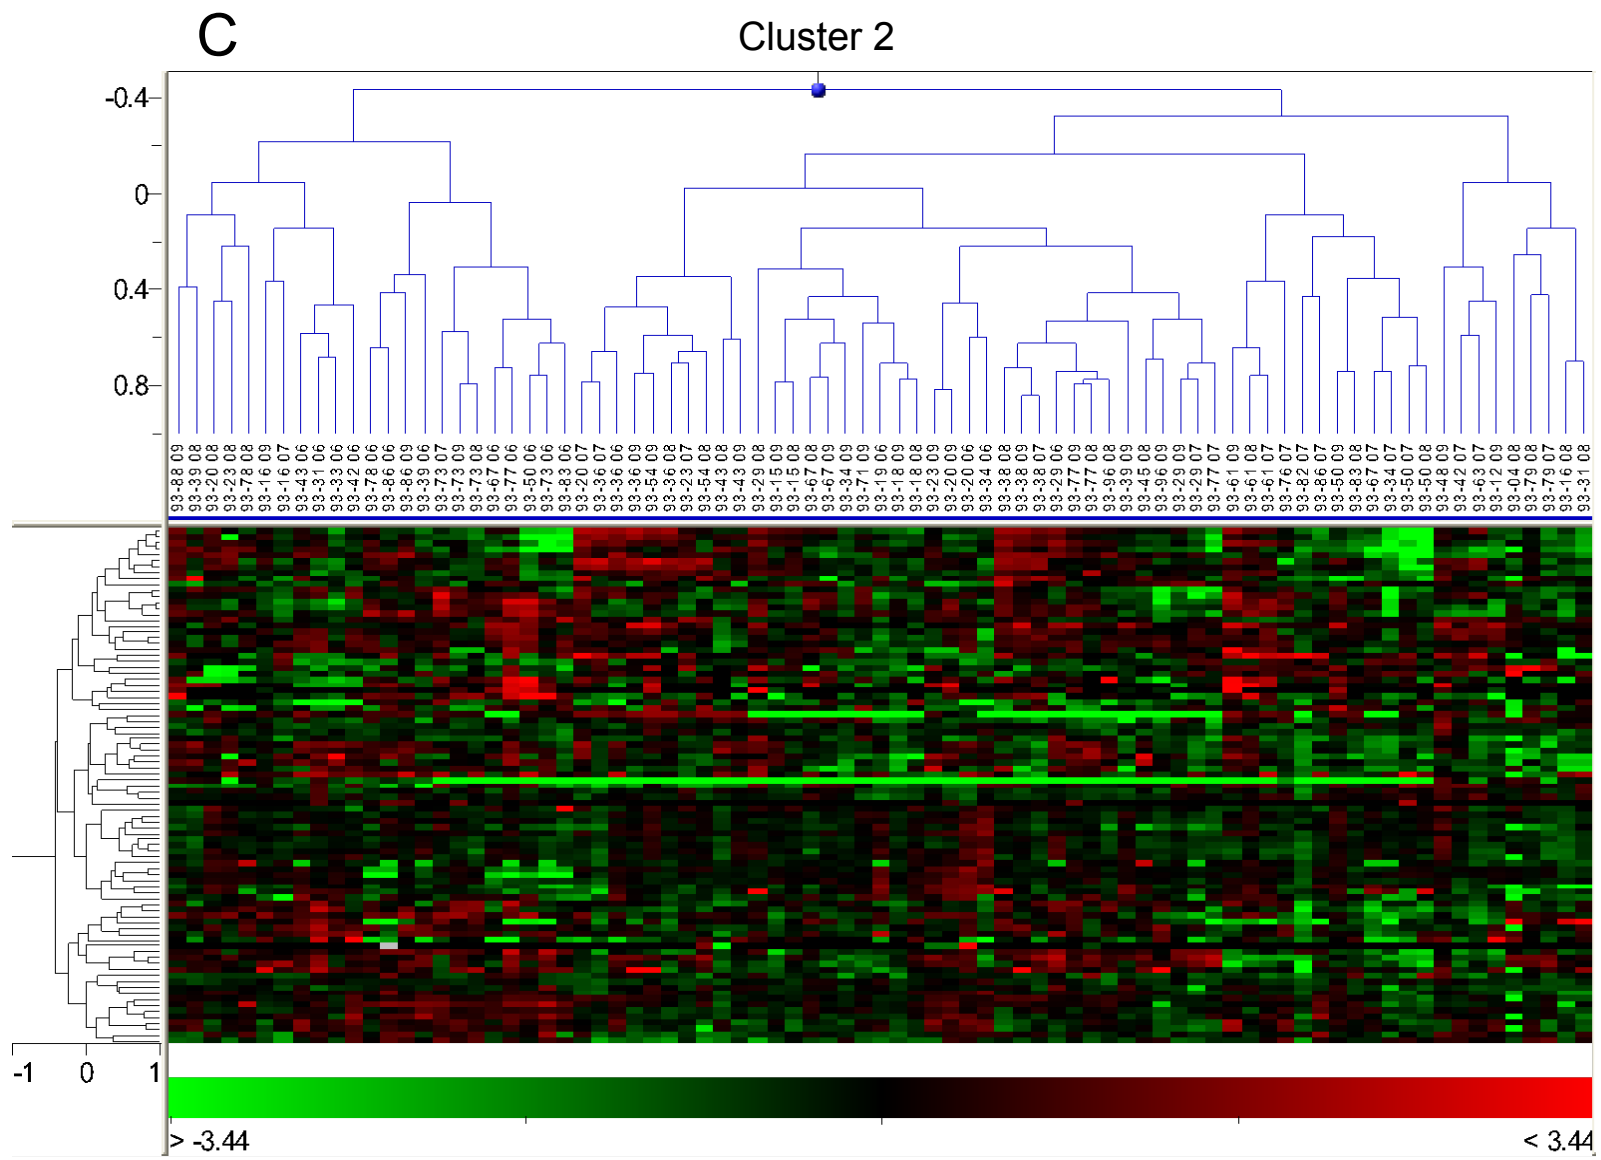





**Figure S3.** HCA and heat map representation of pair-wise correlations between aroma volatiles identified in '232' × '1392' for year 2008. Regions shown in green and red indicate negative and positive correlations, respectively. Clusters are indicated by different letters and sub-clusters of highly correlated compounds are arranged in white rectangles.

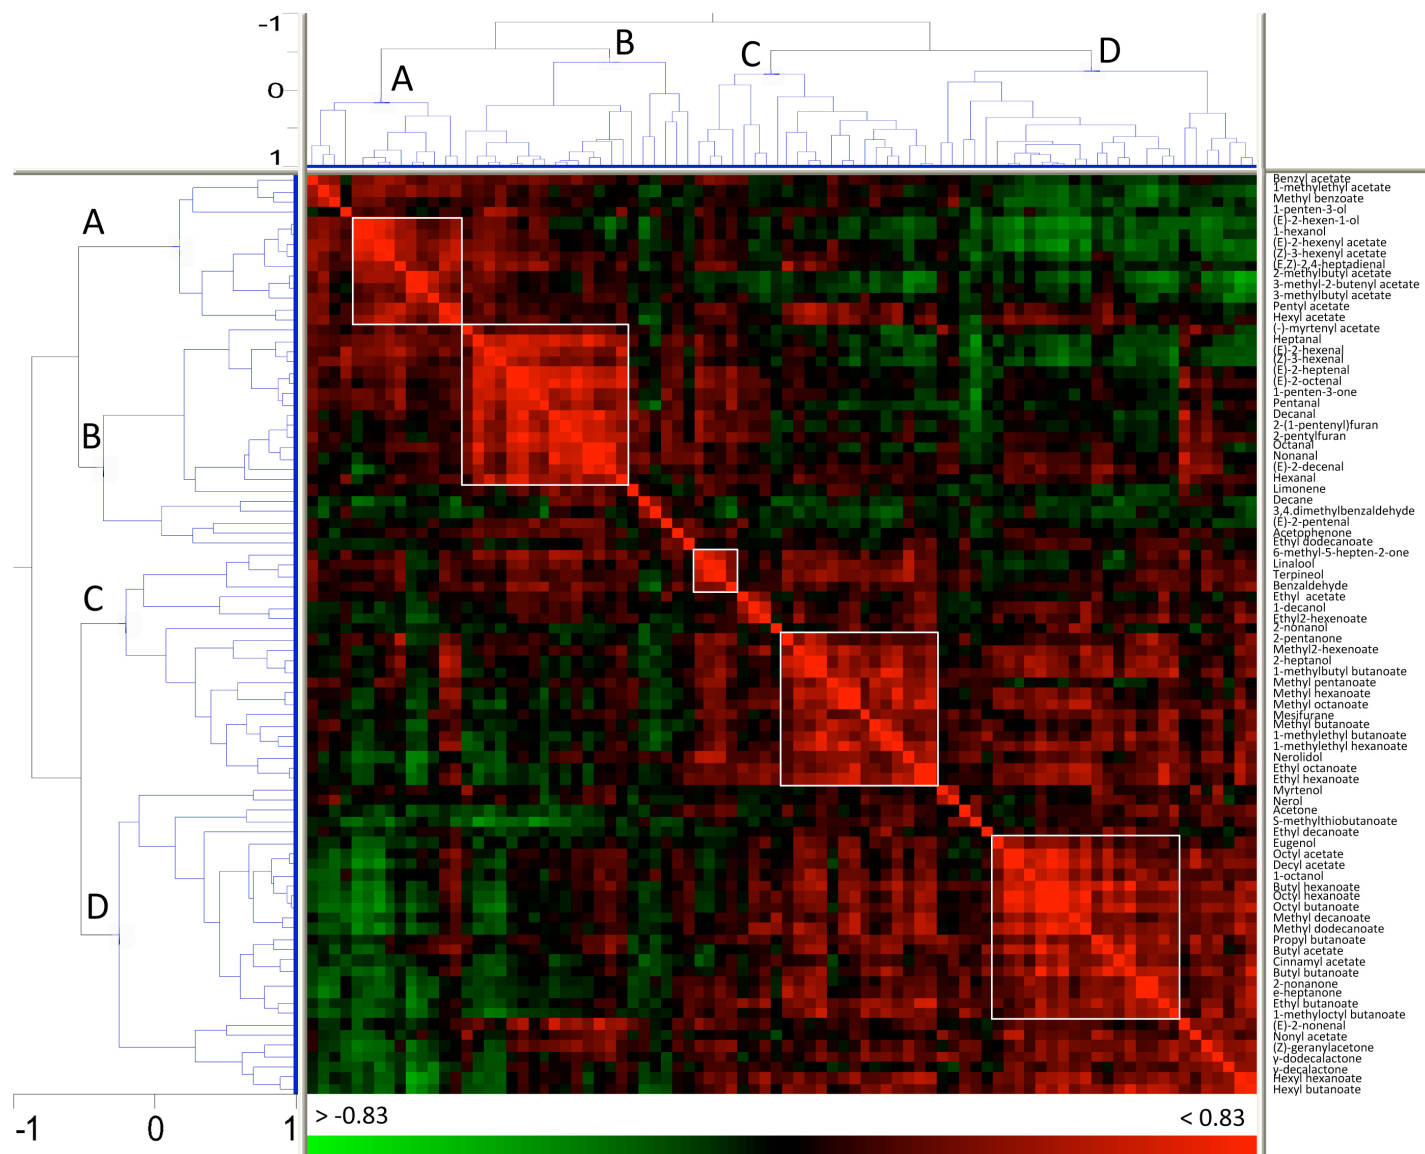

**Figure S4.** Sequence alignment of promoter sequences of *OMT*. *FvOMT* promoter sequence was obtained from *F. vesca* acc. Hawaii 4 (www. Strawberrygenome.org). *FaOMT* promoter sequences from progeny lines 93-23 and 93-62 were obtained from 3 different clones (1, 3 and 6 or 2, 5 and 6, respectively) obtained from bands 4a and b on gel in Fig. 4B (indicated with arrows). *FaOMT* promoter sequences from parental line '1392' were obtained from 3 different clones (1, 3 and 5) obtained after purification of the most similar band to that of *F. vesca* on gel in Fig. 4 (band 2). Common promoter motifs are shown in blue. Motifs and SNPs specific of active allele are highlighted in red. Position of primers for *FaOMT* marker are highlighted in yellow.

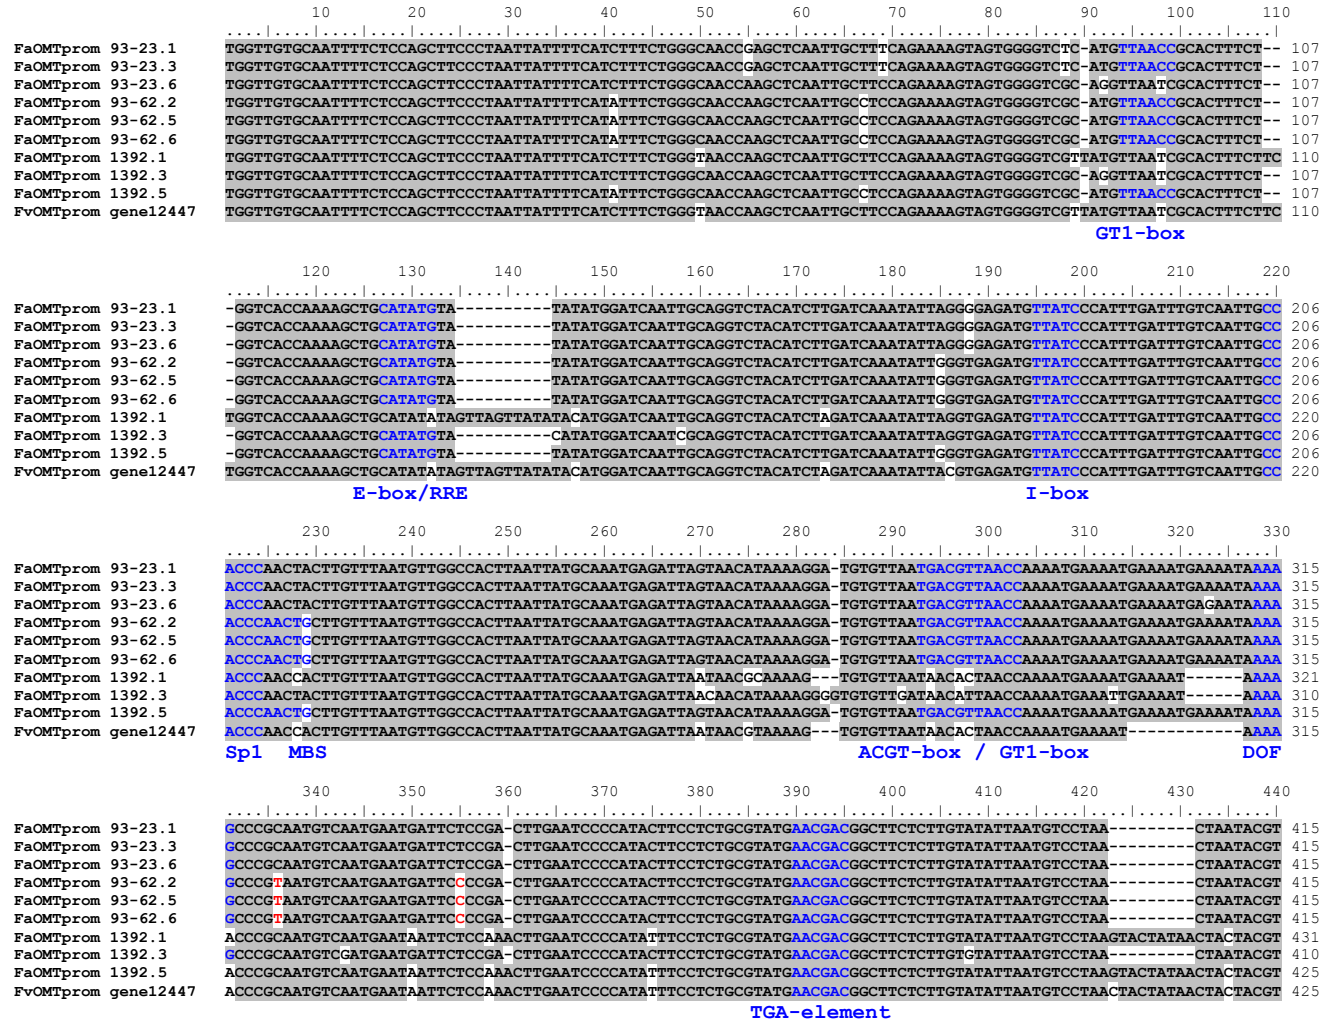

450 460 470 480 490 500 510 520 530 540 550

FaOMTprom 93-23.1 ACCTATGTCAAATATCAAAGAGATTGTA-----TCATCTTATTCTCTCTTCCCTTGATACATAGGAATGCACATTTTCAACAACCTGACGAG-AACGTAATTC 515

FaOMTprom 93-23.3 ACNCTATGTCAAATATCAAAGAGATTGTA-----TCATCTTATTCTCTCTTCCCTTGATACATAGGAATGCACATTTTCAACAACCTGACGAG-AACGTAATTC 515

FaOMTprom 93-23.6 ACTCTATGTCAAATATCAAAGAGATTGTA-----TCATCTTATTCTCTCTTCCCTTGATACATAGGAATGCACATTTTCAACAACCTGACGAG-AACGTAATTC 515

FaOMTprom 93-62.2 ACTCTATGTCAAATATCAAAGAGATTGTA-----TCATCTTATTCTCTCTTCCCTTGATACATAGGAATGCACATTTTCAACAACCTGACGAG-AACGTAATTC 515

FaOMTprom 93-62.5 ACTCTANGTCAAATATCAAAGAGATTGTA-----TCATCTTATTCTCTCTTCCCTTGATACATAGGAATGCACATTTTCAACAACCTGACGAG-AACGTAATTC 515

FaOMTprom 93-62.6 ACTCTATGTCAAATATCAAAGAGATTGTA-----TCATCTTATTCTCTCTTCCCTTGATACATAGGAATGCACATTTTCAACAACCTGACGAG-AACGTAATTC 515

FaOMTprom 1392.1 ACTTATGTCAAATATCAAAGAGATTGTA-----TCATCTTATTCTCTCTTCCCTTGATACATAGGAATGCACATTTTCAACAACCTGACGAGAACTAAATTC 532

FaOMTprom 1392.3 ACTCTATGTCAAATATCAAAGAGATTGTA-----TCATCTTATTCTCTCTTCCCTTGATACATAGGAATGCACATTTTCAACAACCTGACGAG-AACGTAATTC 510

FaOMTprom 1392.5 ACTTATGTCAAATATCAAAGAGATTGTA-----TCATCTTATTCTCTCTTCCCTTGATACATAGGAATGCACATTTTCAACAACCTGACGAGAACTAAATTC 526

FvOMTprom gene12447 ACTTATGTCAAATATCAAAGAGATTGTAATCATCTTATTCTCTTCCCTTGATACATAGGAATGCACATTTTCAACAACCTGACGAGAACTAAATTC 535

DOF E-box/RRE MBS ACGT-box

560 570 580 590 600 610 620 630 640 650 660

FaOMTprom 93-23.1 TTTAATCTTCACTCTGCAGAATTAGATGAA-GTGAATGGA-GAAAGATAGGGCAACCAGATTTGAATTAATAAATTGATGATACAATGTGAAGTAAATTAATTAGTT 623

FaOMTprom 93-23.3 TTTAATCTTCACTCTGCAGAATTAGATGAA-GTGAATGGA-GAAAGATAGGGCAACCAGATTTGAATTAATAAATTGATGATACAATGTGAAGTAAATTAATTAGTT 623

FaOMTprom 93-23.6 TTTAATCTTCACTCTGCAGAATTAGATGAA-GTGAATGGA-GAAAGATAGGGCAACCAGATTTGAATTAATAAATTGATGATACAATGTGAAGTAAATTAATTAGTT 623

FaOMTprom 93-62.2 TTTAATCTTCACTCTGCAGAATTAGATGAA-GTGAATGGA-GAAAGCTAGGGCAACCAGATTTGAATTAATAAATTGA---TACAATGTGAAGTAAATTAATTAGTT 620

FaOMTprom 93-62.5 TTTAATCTTCACTCTGCAGAATTAGATGAA-GTGAATGGA-GAAAGCTAGGGCAACCAGATTTGAATTAATAAATTGA---TACAATGTGAAGTAAATTAATTAGTT 620

FaOMTprom 93-62.6 TTTAATCTTCACTCTGCAGAATTAGATGAA-GTGAATGGA-GAAAGCTAGGGCAACCAGATTTGAATTAATAAATTGA---TACAATGTGAAGTAAATTAATTAGTT 620

FaOMTprom 1392.1 TTTAATCTTCACTCTGCAGAATTAGATGAA-GTGAATGGA-GAAAGCTAGGGCAACCAGATTTGAATTAATAAATTGA---TACAATGTGAAGTAAATTAATTAGTT 636

FaOMTprom 1392.3 TTTAATCTTCACTCTGCAGAATTAGATGAA-GTGAATGGA-GAAAGCTAGGGCAACCAGATTTGAATTAATAAATTGA---TACAATGTGAAGTAAATTAATTAGTT 617

FaOMTprom 1392.5 TTTAATCTTCACTCTGCAGAATTAGATGAA-GTGAATGGA-GAAAGCTAGGGCAACCAGATTTGAATTAATAAATTGA---TACAATGTGAAGTAAATTAATTAGTT 631

FvOMTprom gene12447 TTTAATCTTCACTCTGCAGAATTAGATGAA-GTGAATGGA-GAAAGCTAGGGCAACCAGATTTGAATTAATAAATTGA---TACAATGTGAAGTAAATTAATTAGTT 640

DOF O2-motif MBS MYBL

670 680 690 700 710 720 730 740 750 760 770

FaOMTprom 93-23.1 AGGTCCTACTATAGTGTGTCATGTGAAGAATTGGTCCATG--AGCTCACCTCAACTGATGTGATCACCAGCTTAATTTGGTGGTGTACGTTTCAAGTAAGCAGGACA 731

FaOMTprom 93-23.3 AGGTCCTACTATAGTGTGTCATGTGAAGAATTGGTCCATG--AGCTCACCTCAACTGATGTGATCACCAGCTTAATTTGGTGGTGTACGTTTCAAGTAAGCAGGACA 731

FaOMTprom 93-23.6 AGGTCCTACTATAGTGTGTCATGTGAAGAATTGGTCCATG--AGCTCACCTCAACTGATGTGATCACCAGCTTAATTTGGTGGTGTACGTTTCAAGTAAGCAGGACA 731

FaOMTprom 93-62.2 AGGTCCTACTATAGTGTGTCATGTGAAGAATTGGTCCATG--AGCTCACCTCAACTGATGTGATCACCAGCTTAATTTGGTGGTGTACGTTTCAAGTAAGCAGGACA 728

FaOMTprom 93-62.5 AGGTCCTACTATAGTGTGTCATGTGAAGAATTGGTCCATG--AGCTCACCTCAACTGATGTGATCACCAGCTTAATTTGGTGGTGTACGTTTCAAGTAAGCAGGACA 728

FaOMTprom 93-62.6 AGGTCCTACTATAGTGTGTCATGTGAAGAATTGGTCCATG--AGCTCACCTCAACTGATGTGATCACCAGCTTAATTTGGTGGTGTACGTTTCAAGTAAGCAGGACA 728

FaOMTprom 1392.1 AGGTCGACTATAGTGTGTCATGTGAAGAATTGGTCCATA--AGCTCACCTCAACTGATGTGATCTCCGAGCTTAATTTGGTGGTGTACCTTTCAAGTAAGCAGGACA 744

FaOMTprom 1392.3 AGGTCCTACTATAGTGTGTCATGTGAAGAATTGGTCCATATAAGCTCACCTCAACTGATGTGATCTCCGAGCTTAATTTGGTGGTGTACCTTTCAAGTAAGCAGGACA 727

FaOMTprom 1392.5 AGGTCGACTATAGTGTGTCATGTGAAGAATTGGTCCATA--AGCTCACCTCAACTGATGTGATCTCCGAGCTTAATTTGGTGGTGTACCTTTCAAGTAAGCAGGACA 739

FvOMTprom gene12447 AGGTCCTACTATAGTGTGTCATGTGAAGAATTGGTCCATA--AGCTCACCTCAACTGATGTGATCTCCGAGCTTAATTTGGTGGTGTACCTTTCAAGTAAGCAGGACA 748

GCN4 motif AuxRR-core MBS ACGT-box

780 790 800 810 820 830 840 850 860 870 880

FaOMTprom 93-23.1 AGGTACAATAGTTTGTTCACCTATAAATTA---GTACTTAAATTAAGAGGTTAAATGTTATCACAATGACATGATCATTACGAAAAGGACTAGT-GATTGTTTGTGTA 836

FaOMTprom 93-23.3 AGGTACAATAGTTTGTTCACCTATAAATTA---GTACTTAAATTAAGAGGTTAAATGTTATCACAATGACATGATCATTACGAAAAGGACTAGT-GATTGTTTGTGTA 836

FaOMTprom 93-23.6 AGGTACAATAGTTTGTTCCTTATAAATTA---GTACTTAAATTAAGAGGTTAAATGTTATCACAATGACATGATCATTACGAAAAGGACTAGT-GATTGTTTGTGTA 836

FaOMTprom 93-62.2 AGGTACAATAGTTTGTTCACCTATAAATTA---GTACTTAAATTAAGAGGTTAAATGTTATCACAATGACATGATCATTACGAAAAGGACTAGT-GATTGTTTGTGTA 833

FaOMTprom 93-62.5 AGGTACAATAGTTTGTTCACCTATAAATTA---GTACTTAAATTAAGAGGTTAAATGTTATCACAATGACATGATCATTACGAAAAGGACTAGT-GATTGTTTGTGTA 833

FaOMTprom 93-62.6 AGGTACAATAGTTTGTTCACCTATAAATTA---GTACTTAAATTAAGAGGTTAAATGTTATCACAATGACATGATCATTACGAAAAGGACTAGT-GATTGTTTGTGTA 833

FaOMTprom 1392.1 AGGTACAATAGTTTGTTCACCTATAAATTAAGTACTTAAATTAAGAGGTTAAATGTTATCACAATGACATGATCATTACGAAAAGGACTAGTAAATGCTGTGTC 854

FaOMTprom 1392.3 AGGTACAATAGTTTGTTCACCTATAAATTA---GTACTTAAATTAAGAGGTTAAATGTTATCACAATGACATGATCATTACGAAAAGGACTAGT-GATTGTTTGTGTA 832

FaOMTprom 1392.5 AGGTACAATAGTTTGTTCACCTATAAATTAAGTACTTAAATTAAGAGGTTAAATGTTATCACAATGACATGATCATTACGAAAAGGACTAGTAAATGCTGTGTC 849

FvOMTprom gene12447 AGGTACAATAGTTTGTTCACCTATAAATTA---GTACTTAAATTAAGAGGTTAAATGTTATCACAATGACATGATCATTACGAAAAGGACTAGTAAATGCTGTGTC 854

G11-box I-box WUN-Motif

890 900 910 920 930 940 950 960 970 980 990

FaOMTprom 93-23.1 CTCA----- 841  
 FaOMTprom 93-23.3 CTCA----- 841  
 FaOMTprom 93-23.6 CTCA----- 841  
 FaOMTprom 93-62.2 CTCA----- 839  
 FaOMTprom 93-62.5 CTCA----- 839  
 FaOMTprom 93-62.6 CTCA----- 839  
 FaOMTprom 1392.1 CTCAATCTATTATAAGAACCTTTTATTATGCGATAAATAATCGTTACTATCTACAAAATAAAATGGTTGTGAGCCTGCCTTCGTGCCGAAGTTACGGTAAAAACACGCA 964  
 FaOMTprom 1392.3 CTCAATCTCTTTATAAGAACCTTTTATTATGCGATAAATAATCGTTACTATCTACAAAATAAAATGGTTGTGAGCCTGCCTTCATGCCGAAGTTACGGTAAAAACACATA 942  
 FaOMTprom 1392.5 CTCAATCTATTATAAGAACCTTTTATTATGCGATAAATAATCGTTACTATCTACAAAATAAAATGGTTGTGAGCCTGCCTTCGTGCCGAAGTTACGGTAAAAACACGCA 958  
 FvOMTprom gene12447 CTCAATCTATTATAAGAACCTTTTATTATGCGATAAATAATCGTTACTATCTACAAAATAAAATGGTTGTGAGCCTGCCTTCGTGCCGAAGTTACGGTAAAAACACGCA 964

1000 1010 1020 1030 1040 1050 1060 1070 1080 1090 1100

FaOMTprom 93-23.1 ----- 855  
 FaOMTprom 93-23.3 ----- 855  
 FaOMTprom 93-23.6 ----- 855  
 FaOMTprom 93-62.2 ----- 857  
 FaOMTprom 93-62.5 ----- 857  
 FaOMTprom 93-62.6 ----- 857  
 FaOMTprom 1392.1 TCATCTCAAAGTTTGTAGAA-CAGTTACATATTTGGGATTACATTCAGAGTAGATACAATACTAAATTCCTACTAAAAATA----- 1046  
 FaOMTprom 1392.3 TTATCCCAATTTTTTATAGAAACAGTTACATATTTGGGATCAGTTACATCATTAGTCTTCGTATTTAAGAGTTCTTACAATACCT-----AAGTTTACTAAA 1039  
 FaOMTprom 1392.5 TCATCTCAAAGTTTGTAGAA-CAGTTACATATTTGGGATTACATTCAGAGTAGATACAATACTAAATTCCTACTAAAAATA----- 1040  
 FvOMT-prom gene12447 TCATCTCAAAGTTTGTAGAA-CAGTTACATATTTGGGATTACATTCAGAGTAGATACAATACTAAATTCCTACTAAAAATAATTCCTCATGTCATTAATTTTACATCAT 1073

1110 1120 1130 1140 1150 1160 1170 1180 1190 1200 1210

FaOMTprom 93-23.1 -----AACAGAAAAGTTTAC-----TTAATATAGGATTAAGTAAACTTCAAGTATTTGGCAAGTAGGGTCAGGATCATGGACC 913  
 FaOMTprom 93-23.3 -----AACAGAAAAGTTTAC-----TTAATATAGGATTAAGTAAACTTCAAGTATTTGGCAAGTAGGGTCAGGATCATGGACC 913  
 FaOMTprom 93-23.6 -----AACAGAAAAGTTTAC-----TTAATATAGGATTAAGTAAACTTCAAGTATTTGGCAAGTAGGGTCAGGATCATGGACC 913  
 FaOMTprom 93-62.2 -----AACAGAAAAGTTTAC-----TTAATATAGGATTAAGTAAACTTCAAGTATTTGGCAAGTAGGGTCAGGATCATGGACC 941  
 FaOMTprom 93-62.5 -----AACAGAAAAGTTTAC-----TTAATATAGGATTAAGTAAACTTCAAGTATTTGGCAAGTAGGGTCAGGATCATGGACC 941  
 FaOMTprom 93-62.6 -----AACAGAAAAGTTTAC-----TTAATATAGGATTAAGTAAACTTCAAGTATTTGGCAAGTAGGGTCAGGATCATGGACC 941  
 FaOMTprom 1392.1 -----TTTATAGTGAACAAGCAGTCCATAAGTTTAAATATAGGATTAAGTAAACTTCAAGTATTTGGCAAGTAGGGTCAGGATCATGGACC 1136  
 FaOMTprom 1392.3 -----AAAATAAATGAACAGCTTGAACAGCTAGCCAGTCCATAAGTTTAAATATAGGATTAAGTAAACTTCAAGTATTTGGCAAGTAGGGTCAGGATCATGGACC 1141  
 FaOMTprom 1392.5 -----TTTATAGTGAACAAGCAGTCCATAAGTTTAAATATAGGATTAAGTAAACTTCAAGTATTTGGCAAGTAGGGTCAGGATCATGGACC 1130  
 FvOMTprom gene12447 ACGATGATTAACACAGATTTTATAGTGAACAAGCAGTCCATAAGTTTAAATATAGGATTAAGTAAACTTCAAGTATTTGGCAAGTAGGGTCAGGATCATGGACC 1183

GARE-motif E-box/RRE MYBL ABRE/ACGT-box AUXRR-Core

1220 1230 1240 1250 1260 1270 1280 1290 1300 1310 1320

FaOMTprom 93-23.1 TAATGCTCGACACTTTGGGTGCCTGCGAGCGCATCAAAGATGGTA-----AGACCACCATATATGTAACCCCACTCACTATTATCATCTCCACAACCTAAC 1011  
 FaOMTprom 93-23.3 TAATGCTCGACACTTTGGGTGCCTGCGAGCGCATCAAAGATGGTA-----AGACCACCATATATGTAACCCCACTCACTATTATCATCTCCACAACCTAAC 1011  
 FaOMTprom 93-23.6 TAATGCTCGACACTTTGGGTGCCTGCGAGCGCATCAAAGATGGTA-----AGACCACCATATATGTAACCCCACTCACTATTATCATCTCCACAACCTAAC 1011  
 FaOMTprom 93-62.2 TAATGCTCGACACTTTGGGTGCCTGCGAGCGCATCAAAGATGGTA-----AGACCACCATATATGTAACCCCACTCACTATTATCATCTCCACAACCTAAC 1039  
 FaOMTprom 93-62.5 TAATGCTCGACACTTTGGGTGCCTGCGAGCGCATCAAAGATGGTA-----AGACCACCATATATGTAACCCCACTCACTATTATCATCTCCACAACCTAAC 1039  
 FaOMTprom 93-62.6 TAATGCTCGACACTTTGGGTGCCTGCGAGCGCATCAAAGATGGTA-----AGACCACCATATATGTAACCCCACTCACTATTATCATCTCCACAACCTAAC 1039  
 FaOMTprom 1392.1 TAATGCTCGACACTTTGGGTGCCTGG-AGCACATCAAAGATGGTGGTGGTGAGCCAGACCACCATATATGTAACCCCACTCACTATTATCATCTCCACAACCTAAC 1245  
 FaOMTprom 1392.3 TAATGCTCGACACTTTGGGTGCCTGCGAGCATCAAAGATGGTGGTGGTGAGCCAGACCACCATATATGTAACCCCACTCACTATTATCATCTCCACAACCTAAC 1251  
 FaOMTprom 1392.5 TAATGCTCGACACTTTGGGTGCCTGG-AGCACATCAAAGATGGTGGTGGTGAGCCAGACCACCATATATGTAACCCCACTCACTATTATCATCTCCACAACCTAAC 1239  
 FvOMTprom gene12447 TAATGCTCGACACTTTGGGTGCCTGGGAGCACATCAAAGATGGTGGTGGTGAGCCAGACCACCATATATGTAACCCCACTCACTATTATCATCTCCACAACCTAAC 1293

TATA box

1330 1340 1350 1360 1370 1380 1390 1400 1410

FaOMTprom 93-23.1 CTGC-----TTCTTCTCTGTCTCTCT-----CTATCTAGCACTACCTCATCACTCTTCTACATCATCTTTCACAAAACCTGCAACTTAACCCAAAATG 1097  
 FaOMTprom 93-23.3 CTGC-----TTCTTCTCTGTCTCTCT-----CTATCTAGCACTACCTCATCACTCTTCTACATCATCTTTCACAAAACCTGCAACTTAACCCAAAATG 1097  
 FaOMTprom 93-23.6 CTGC-----TTCTTCTCTGTCTCTCT-----CTATCTAGCACTACCTCATCACTCTTCTACATCATCTTTCACAAAACCTGCAACTTAACCCAAAATG 1097  
 FaOMTprom 93-62.2 CTGC-----TTCTTCTCTGTCTCTCTAGCTCTATCTAGCACTACCTCATCACTCTTCTACATCATCTTTCACAAAACCTGCAACTTAACCCAAAATG 1129  
 FaOMTprom 93-62.5 CTGC-----TTCTTCTCTGTCTCTCTAGCTCTATCTAGCACTACCTCATCACTCTTCTACATCATCTTTCACAAAACCTGCAACTTAACCCAAAATG 1129  
 FaOMTprom 93-62.6 CTGC-----TTCTTCTCTGTCTCTCTAGCTCTATCTAGCACTACCTCATCACTCTTCTACATCATCTTTCACAAAACCTGCAACTTAACCCAAAATG 1129  
 FaOMTprom 1392.1 CGGCCTGTTCTTCTCTGTCTCTCT-----CTATCTAGCACTACCTCATCACTCTTCT--TCATCTTTCACAAAACCTGCAACTTAACCCAAAATG 1332  
 FaOMTprom 1392.3 CTGCGAA-TTCTTCTCTGTCTCTCT-----CTATCTAGCACTACCTCATCACTCTTCTTCTTCTACATCATCTTTCACAAAACCTGCAACTTAACCCAAAATG 1340  
 FaOMTprom 1392.5 CGGCCTGTTCTTCTCTGTCTCTCT-----CTATCTAGCACTACCTCATCACTCTTCT--TCATCTTTCACAAAACCTGCAACTTAACCCAAAATG 1326  
 FvOMTprom gene12447 CGGCCTGTTCTTCTCTGTCTCTCT-----CTATCTAGCACTACCTCATCACTCTTCT--TCATCTTTCACAAAACCTGCAACTTAACCCAAAATG 1380

5' UTR Py-rich

ATG



**Table S1.** Pair-wise correlations among the 87 volatiles identified in the ‘232’ × ‘1392’ mapping population for year 2008. Significant correlations ( $P < 0.05$ ) are labeled in bold. The sign of the correlation coefficient indicates the direction of correlations. For volatile codes see Table I.

| Code | 1             | 2               | 3             | 4             | 5             | 6            | 7             | 8             | 9            | 10            | 11            | 12           | 13            | 14           | 15           | 16            | 17            | 18            | 19            | 20            | 21            | 22            | 23           | 24           | 25            | 26           | 27            | 28            | 29            | 30           |
|------|---------------|-----------------|---------------|---------------|---------------|--------------|---------------|---------------|--------------|---------------|---------------|--------------|---------------|--------------|--------------|---------------|---------------|---------------|---------------|---------------|---------------|---------------|--------------|--------------|---------------|--------------|---------------|---------------|---------------|--------------|
| 1    | 1             | -0.124          | -0.011        | -0.037        | -0.149        | <b>0.266</b> | -0.125        | 0.055         | -0.038       | 0.192         | -0.154        | -0.026       | 0.116         | 0.088        | 0.202        | <b>-0.259</b> | -0.056        | -0.123        | -0.171        | <b>-0.228</b> | <b>0.351</b>  | <b>0.319</b>  | <b>0.216</b> | 0.085        | -0.155        | -0.079       | -0.159        | -0.068        | -0.053        | -0.052       |
| 2    | -0.124        | 1               | 0.067         | 0.013         | 0.173         | -0.069       | 0.128         | 0.079         | <b>0.299</b> | <b>0.416</b>  | 0.026         | 0.116        | -0.017        | -0.014       | -0.052       | 0.076         | -0.030        | 0.014         | 0.162         | -0.147        | -0.043        | -0.044        | <b>0.292</b> | -0.034       | 0.068         | 0.041        | -0.081        | 0.059         | 0.202         | 0.128        |
| 3    | -0.011        | 0.067           | 1             | -0.018        | <b>0.228</b>  | -0.112       | 0.163         | 0.194         | -0.012       | <b>-0.212</b> | <b>0.320</b>  | 0.024        | -0.074        | 0.174        | 0.116        | 0.171         | <b>0.372</b>  | <b>0.401</b>  | <b>0.346</b>  | <b>0.421</b>  | <b>-0.364</b> | -0.071        | -0.092       | -0.052       | <b>0.208</b>  | <b>0.290</b> | <b>0.305</b>  | 0.056         | 0.127         | -0.025       |
| 4    | -0.037        | 0.013           | -0.018        | 1             | <b>0.219</b>  | 0.151        | 0.147         | 0.015         | -0.073       | -0.100        | <b>0.466</b>  | <b>0.346</b> | -0.075        | 0.069        | 0.061        | <b>0.511</b>  | 0.196         | 0.131         | -0.020        | -0.024        | 0.011         | <b>-0.270</b> | -0.058       | 0.167        | <b>0.214</b>  | 0.161        | -0.076        | 0.109         | <b>0.378</b>  | 0.145        |
| 5    | -0.149        | 0.173           | <b>0.228</b>  | <b>0.219</b>  | 1             | 0.163        | <b>0.674</b>  | -0.001        | <b>0.363</b> | -0.073        | <b>0.515</b>  | <b>0.414</b> | 0.087         | -0.015       | -0.021       | <b>0.618</b>  | <b>0.284</b>  | <b>0.272</b>  | 0.069         | 0.080         | -0.065        | <b>-0.417</b> | 0.138        | 0.121        | <b>0.599</b>  | 0.147        | 0.052         | -0.050        | <b>0.704</b>  | 0.118        |
| 6    | <b>0.266</b>  | -0.069          | -0.112        | 0.151         | 0.163         | 1            | 0.112         | 0.142         | -0.088       | <b>0.296</b>  | 0.092         | 0.054        | 0.110         | <b>0.211</b> | <b>0.251</b> | 0.119         | <b>0.207</b>  | 0.018         | -0.107        | -0.170        | <b>0.543</b>  | -0.076        | 0.123        | <b>0.596</b> | 0.026         | <b>0.321</b> | -0.124        | 0.187         | 0.107         | <b>0.326</b> |
| 7    | -0.125        | 0.128           | 0.163         | 0.147         | <b>0.674</b>  | 0.112        | 1             | -0.080        | 0.147        | -0.098        | <b>0.328</b>  | <b>0.445</b> | -0.053        | -0.076       | -0.084       | <b>0.462</b>  | <b>0.241</b>  | <b>0.266</b>  | 0.076         | 0.100         | -0.077        | <b>-0.344</b> | -0.024       | -0.104       | <b>0.601</b>  | 0.081        | 0.146         | <b>-0.207</b> | <b>0.652</b>  | 0.031        |
| 8    | 0.055         | 0.079           | 0.194         | 0.015         | -0.001        | 0.142        | -0.080        | 1             | -0.090       | <b>0.458</b>  | -0.080        | -0.036       | <b>0.270</b>  | <b>0.591</b> | <b>0.651</b> | -0.113        | -0.083        | -0.169        | -0.014        | <b>-0.226</b> | 0.147         | 0.102         | <b>0.286</b> | <b>0.243</b> | -0.020        | 0.086        | <b>-0.243</b> | <b>0.461</b>  | -0.077        | <b>0.305</b> |
| 9    | -0.038        | <b>0.299</b>    | -0.012        | -0.073        | <b>0.363</b>  | -0.088       | 0.147         | -0.090        | 1            | 0.022         | 0.155         | -0.104       | -0.020        | -0.132       | -0.177       | 0.170         | 0.074         | 0.085         | 0.166         | 0.008         | -0.111        | -0.185        | -0.093       | -0.086       | <b>0.211</b>  | -0.043       | -0.053        | -0.095        | <b>0.222</b>  | -0.055       |
| 10   | 0.192         | <b>0.416</b>    | <b>-0.212</b> | -0.100        | -0.073        | <b>0.296</b> | -0.098        | <b>0.458</b>  | 0.022        | 1             | -0.188        | 0.037        | <b>0.398</b>  | <b>0.238</b> | <b>0.402</b> | <b>-0.212</b> | <b>-0.243</b> | <b>-0.236</b> | -0.057        | <b>-0.389</b> | <b>0.533</b>  | 0.177         | <b>0.566</b> | <b>0.290</b> | -0.170        | 0.047        | <b>-0.275</b> | 0.191         | -0.099        | <b>0.359</b> |
| 11   | -0.154        | 0.026           | <b>0.320</b>  | <b>0.466</b>  | <b>0.515</b>  | 0.092        | <b>0.328</b>  | -0.080        | 0.155        | -0.188        | 1             | <b>0.390</b> | -0.136        | -0.001       | -0.163       | <b>0.716</b>  | <b>0.283</b>  | <b>0.286</b>  | 0.081         | <b>0.216</b>  | -0.124        | <b>-0.270</b> | -0.048       | 0.002        | <b>0.528</b>  | 0.154        | 0.151         | -0.129        | <b>0.535</b>  | 0.091        |
| 12   | -0.026        | 0.116           | 0.024         | <b>0.346</b>  | <b>0.414</b>  | 0.054        | <b>0.445</b>  | -0.036        | -0.104       | 0.037         | <b>0.390</b>  | 1            | 0.174         | 0.102        | 0.067        | <b>0.648</b>  | -0.157        | -0.007        | 0.124         | 0.099         | 0.014         | -0.166        | <b>0.297</b> | 0.181        | <b>0.422</b>  | <b>0.219</b> | 0.101         | 0.159         | <b>0.683</b>  | <b>0.294</b> |
| 13   | 0.116         | -0.017          | -0.074        | -0.075        | 0.087         | 0.110        | -0.053        | <b>0.270</b>  | -0.020       | <b>0.398</b>  | -0.136        | 0.174        | 1             | 0.018        | <b>0.422</b> | -0.038        | <b>-0.249</b> | <b>-0.271</b> | 0.195         | 0.088         | <b>0.329</b>  | 0.060         | <b>0.663</b> | <b>0.466</b> | -0.020        | <b>0.344</b> | 0.116         | <b>0.275</b>  | 0.005         | <b>0.344</b> |
| 14   | 0.088         | -0.014          | 0.174         | 0.069         | -0.015        | <b>0.211</b> | -0.076        | <b>0.591</b>  | -0.132       | <b>0.238</b>  | -0.001        | 0.102        | 0.018         | 1            | <b>0.457</b> | 0.094         | 0.013         | -0.050        | -0.104        | -0.093        | -0.005        | 0.119         | 0.124        | <b>0.276</b> | 0.086         | <b>0.279</b> | -0.132        | <b>0.652</b>  | 0.082         | <b>0.403</b> |
| 15   | 0.202         | -0.052          | 0.116         | 0.061         | -0.021        | <b>0.251</b> | -0.084        | <b>0.651</b>  | -0.177       | <b>0.402</b>  | -0.163        | 0.067        | <b>0.422</b>  | <b>0.457</b> | 1            | -0.093        | -0.158        | -0.145        | 0.041         | -0.131        | <b>0.298</b>  | <b>0.245</b>  | <b>0.372</b> | <b>0.470</b> | -0.159        | <b>0.279</b> | -0.134        | <b>0.415</b>  | -0.027        | <b>0.404</b> |
| 16   | <b>-0.259</b> | 0.076           | 0.171         | <b>0.511</b>  | <b>0.618</b>  | 0.119        | <b>0.462</b>  | -0.113        | 0.170        | <b>-0.212</b> | <b>0.716</b>  | <b>0.648</b> | -0.038        | 0.094        | -0.093       | 1             | <b>0.290</b>  | <b>0.343</b>  | 0.198         | <b>0.345</b>  | -0.179        | <b>-0.363</b> | 0.023        | 0.140        | <b>0.590</b>  | <b>0.348</b> | <b>0.239</b>  | 0.016         | <b>0.680</b>  | 0.189        |
| 17   | -0.056        | -0.030          | <b>0.372</b>  | 0.196         | <b>0.284</b>  | <b>0.207</b> | <b>0.241</b>  | -0.083        | 0.074        | <b>-0.243</b> | <b>0.283</b>  | -0.157       | <b>-0.249</b> | 0.013        | -0.158       | <b>0.290</b>  | 1             | <b>0.863</b>  | 0.172         | <b>0.391</b>  | -0.152        | <b>-0.303</b> | -0.136       | 0.027        | <b>0.276</b>  | <b>0.269</b> | 0.186         | -0.147        | 0.132         | -0.123       |
| 18   | -0.123        | 0.014           | <b>0.401</b>  | 0.131         | <b>0.272</b>  | 0.018        | <b>0.266</b>  | -0.169        | 0.085        | <b>-0.236</b> | <b>0.286</b>  | -0.007       | <b>-0.271</b> | -0.050       | -0.145       | <b>0.343</b>  | <b>0.863</b>  | 1             | <b>0.213</b>  | <b>0.462</b>  | <b>-0.231</b> | -0.179        | -0.116       | -0.055       | <b>0.288</b>  | <b>0.308</b> | <b>0.263</b>  | -0.171        | <b>0.213</b>  | -0.095       |
| 19   | -0.171        | 0.162           | <b>0.346</b>  | -0.020        | 0.069         | -0.107       | 0.076         | -0.014        | 0.166        | -0.057        | 0.081         | 0.124        | 0.195         | -0.104       | 0.041        | 0.198         | 0.172         | <b>0.213</b>  | 1             | <b>0.604</b>  | <b>-0.229</b> | -0.120        | 0.148        | 0.074        | <b>0.269</b>  | <b>0.386</b> | <b>0.491</b>  | -0.022        | 0.153         | 0.073        |
| 20   | <b>-0.228</b> | -0.147          | <b>0.421</b>  | -0.024        | 0.080         | -0.170       | 0.100         | <b>-0.226</b> | 0.008        | <b>-0.389</b> | <b>0.216</b>  | 0.099        | 0.088         | -0.093       | -0.131       | <b>0.345</b>  | <b>0.391</b>  | <b>0.462</b>  | <b>0.604</b>  | 1             | <b>-0.358</b> | -0.104        | -0.027       | 0.028        | <b>0.261</b>  | <b>0.419</b> | <b>0.796</b>  | -0.119        | 0.126         | -0.052       |
| 21   | <b>0.351</b>  | -0.043          | <b>-0.364</b> | 0.011         | -0.065        | <b>0.543</b> | -0.077        | 0.147         | -0.111       | <b>0.533</b>  | -0.124        | 0.014        | <b>0.329</b>  | -0.005       | <b>0.298</b> | -0.179        | -0.152        | <b>-0.231</b> | <b>-0.229</b> | <b>-0.358</b> | 1             | 0.097         | <b>0.370</b> | <b>0.483</b> | -0.158        | -0.031       | -0.204        | 0.037         | -0.112        | <b>0.350</b> |
| 22   | <b>0.319</b>  | -0.044          | -0.071        | <b>-0.270</b> | <b>-0.417</b> | -0.076       | <b>-0.344</b> | 0.102         | -0.185       | 0.177         | <b>-0.270</b> | -0.166       | 0.060         | 0.119        | <b>0.245</b> | <b>-0.363</b> | <b>-0.303</b> | -0.179        | -0.120        | -0.104        | 0.097         | 1             | 0.170        | -0.017       | <b>-0.439</b> | -0.089       | -0.007        | 0.117         | <b>-0.285</b> | -0.014       |
| 23   | <b>0.216</b>  | <b>0.292</b>    | -0.092        | -0.058        | 0.138         | 0.123        | -0.024        | <b>0.286</b>  | -0.093       | <b>0.566</b>  | -0.048        | <b>0.297</b> | <b>0.663</b>  | 0.124        | <b>0.372</b> | 0.023         | -0.136        | -0.116        | 0.148         | -0.027        | <b>0.370</b>  | 0.170         | 1            | <b>0.327</b> | 0.036         | 0.195        | 0.040         | 0.181         | 0.104         | <b>0.294</b> |
| 24   | 0.085         | -0.034          | -0.052        | 0.167         | 0.121         | <b>0.596</b> | -0.104        | <b>0.243</b>  | -0.086       | <b>0.290</b>  | 0.002         | 0.181        | <b>0.466</b>  | <b>0.276</b> | <b>0.470</b> | 0.140         | 0.027         | -0.055        | 0.074         | 0.028         | <b>0.483</b>  | -0.017        | <b>0.327</b> | 1            | -0.049        | <b>0.587</b> | -0.039        | <b>0.492</b>  | 0.026         | <b>0.669</b> |
| 25   | -0.155        | 0.068           | <b>0.208</b>  | <b>0.214</b>  | <b>0.599</b>  | 0.026        | <b>0.601</b>  | -0.020        | <b>0.211</b> | -0.170        | <b>0.528</b>  | <b>0.422</b> | -0.020        | 0.086        | -0.159       | <b>0.590</b>  | <b>0.276</b>  | <b>0.288</b>  | <b>0.269</b>  | <b>0.261</b>  | -0.158        | <b>-0.439</b> | 0.036        | -0.049       | 1             | 0.200        | <b>0.231</b>  | -0.101        | <b>0.670</b>  | 0.095        |
| 26   | -0.079        | 0.041           | <b>0.290</b>  | 0.161         | 0.147         | <b>0.321</b> | 0.081         | 0.086         | -0.043       | 0.047         | 0.154         | <b>0.219</b> | <b>0.344</b>  | <b>0.279</b> | <b>0.279</b> | <b>0.348</b>  | <b>0.269</b>  | <b>0.308</b>  | <b>0.386</b>  | <b>0.419</b>  | -0.031        | -0.089        | 0.195        | <b>0.587</b> | 0.200         | 1            | <b>0.323</b>  | <b>0.408</b>  | <b>0.213</b>  | <b>0.447</b> |
| 27   | -0.159        | -0.081          | <b>0.305</b>  | -0.076        | 0.052         | -0.124       | 0.146         | <b>-0.243</b> | -0.053       | <b>-0.275</b> | 0.151         | 0.101        | 0.116         | -0.132       | -0.134       | <b>0.239</b>  | 0.186         | <b>0.263</b>  | <b>0.491</b>  | <b>0.796</b>  | -0.204        | -0.007        | 0.040        | -0.039       | <b>0.231</b>  | <b>0.323</b> | 1             | -0.165        | 0.133         | -0.062       |
| 28   | -0.068        | 0.059           | 0.056         | 0.109         | -0.050        | 0.187        | <b>-0.207</b> | <b>0.461</b>  | -0.095       | 0.191         | -0.129        | 0.159        | <b>0.275</b>  | <b>0.652</b> | <b>0.415</b> | 0.016         | -0.147        | -0.171        | -0.022        | -0.119        | 0.037         | 0.117         | 0.181        | <b>0.492</b> | -0.101        | <b>0.408</b> | -0.165        | 1             | 0.016         | <b>0.585</b> |
| 29   | -0.053        | 0.202           | 0.127         | <b>0.378</b>  | <b>0.704</b>  | 0.107        | <b>0.652</b>  | -0.077        | <b>0.222</b> | -0.099        | <b>0.535</b>  | <b>0.683</b> | 0.005         | 0.082        | -0.027       | <b>0.680</b>  | 0.132         | <b>0.213</b>  | 0.153         | 0.126         | -0.112        | <b>-0.285</b> | 0.104        | 0.026        | <b>0.670</b>  | <b>0.213</b> | 0.133         | 0.016         | 1             | 0.134        |
| 30   | -0.052        | 0.128           | -0.025        | 0.145         | 0.118         | <b>0.326</b> | 0.031         | <b>0.305</b>  | -0.055       | <b>0.359</b>  | 0.091         | <b>0.294</b> | <b>0.344</b>  | <b>0.403</b> | <b>0.404</b> | 0.189         | -0.123        | -0.095        | 0.073         | -0.052        | <b>0.350</b>  | -0.014        | <b>0.294</b> | <b>0.669</b> | 0.095         | <b>0.447</b> | -0.062        | <b>0.585</b>  | 0.134         | 1            |
| 31   | <b>0.228</b>  | 0.078           | 0.035         | 0.107         | <b>0.405</b>  | <b>0.316</b> | <b>0.443</b>  | 0.090         | 0.105        | <b>0.271</b>  | 0.121         | <b>0.212</b> | 0.004         | 0.099        | <b>0.221</b> | 0.117         | 0.159         | 0.169         | 0.064         | -0.108        | 0.184         | -0.025        | 0.140        | 0.162        | <b>0.301</b>  | 0.147        | 0.006         | 0.033         | <b>0.410</b>  | 0.102        |
| 32   | 0.133         | 0.176           | -0.083        | <b>0.268</b>  | <b>0.272</b>  | <b>0.387</b> | <b>0.251</b>  | 0.047         | 0.184        | 0.160         | <b>0.215</b>  | <b>0.319</b> | -0.104        | <b>0.293</b> | 0.127        | <b>0.319</b>  | 0.050         | 0.015         | -0.008        | -0.128        | <b>0.248</b>  | -0.067        | 0.083        | <b>0.293</b> | <b>0.375</b>  | <b>0.232</b> | -0.112        | 0.148         | <b>0.424</b>  | <b>0.280</b> |
| 33   | <b>0.249</b>  | -0.062          | <b>-0.208</b> | -0.144        | 0.023         | <b>0.230</b> | 0.021         | <b>0.305</b>  | -0.107       | <b>0.544</b>  | <b>-0.249</b> | 0.082        | <b>0.780</b>  | -0.098       | <b>0.519</b> | <b>-0.219</b> | <b>-0.286</b> | <b>-0.253</b> | -0.002        | <b>-0.215</b> | <b>0.534</b>  | 0.144         | <b>0.586</b> | <b>0.340</b> | -0.158        | 0.153        | -0.129        | 0.100         | -0.072        | <b>0.277</b> |
| 34   | -0.167        | <b>0.309</b>    | 0.074         | 0.058         | <b>0.665</b>  | -0.004       | <b>0.519</b>  | 0.045         | <b>0.347</b> | 0.074         | <b>0.293</b>  | <b>0.550</b> | 0.035         | 0.117        | 0.015        | <b>0.393</b>  | -0.102        | 0.034         | 0.086         | -0.074        | -0.100        | -0.150        | 0.123        | 0.027        | <b>0.530</b>  | 0.078        | -0.081        | 0.102         | <b>0.740</b>  | 0.171        |
| 35   | 0.103         | <b>0.283</b> </ |               |               |               |              |               |               |              |               |               |              |               |              |              |               |               |               |               |               |               |               |              |              |               |              |               |               |               |              |

Table S1 Continued.

| Code | 31           | 32           | 33            | 34           | 35            | 36            | 37           | 38            | 39           | 40            | 41            | 42           | 43            | 45            | 46           | 47            | 48           | 49            | 50            | 51           | 52            | 53           | 54           | 55           | 56            | 57            | 58            | 59            | 60            |
|------|--------------|--------------|---------------|--------------|---------------|---------------|--------------|---------------|--------------|---------------|---------------|--------------|---------------|---------------|--------------|---------------|--------------|---------------|---------------|--------------|---------------|--------------|--------------|--------------|---------------|---------------|---------------|---------------|---------------|
| 1    | <b>0.228</b> | 0.133        | <b>0.249</b>  | -0.167       | 0.103         | -0.154        | -0.004       | -0.112        | -0.126       | -0.151        | -0.205        | 0.195        | 0.172         | -0.088        | -0.072       | -0.099        | 0.101        | -0.139        | 0.073         | 0.107        | <b>0.341</b>  | -0.021       | 0.138        | -0.065       | -0.138        | -0.010        | 0.088         | 0.038         | 0.190         |
| 2    | 0.078        | 0.176        | -0.062        | <b>0.309</b> | <b>0.283</b>  | 0.112         | -0.041       | 0.071         | 0.066        | 0.048         | 0.065         | -0.043       | 0.001         | <b>0.319</b>  | -0.015       | <b>0.242</b>  | 0.117        | <b>0.220</b>  | -0.030        | -0.025       | -0.031        | -0.060       | 0.120        | 0.129        | 0.078         | 0.166         | 0.141         | <b>0.238</b>  | 0.011         |
| 3    | 0.035        | -0.083       | <b>-0.208</b> | 0.074        | -0.061        | -0.190        | <b>0.291</b> | <b>0.296</b>  | 0.086        | <b>0.383</b>  | <b>0.440</b>  | -0.034       | 0.155         | -0.067        | -0.023       | 0.122         | -0.049       | 0.059         | <b>-0.240</b> | -0.021       | <b>-0.287</b> | -0.038       | 0.057        | -0.117       | <b>0.568</b>  | -0.017        | -0.125        | <b>0.459</b>  | <b>-0.207</b> |
| 4    | 0.107        | <b>0.268</b> | -0.144        | 0.058        | 0.042         | -0.059        | 0.151        | <b>0.227</b>  | -0.092       | 0.151         | 0.200         | 0.093        | 0.043         | 0.110         | 0.005        | 0.069         | -0.084       | <b>0.222</b>  | 0.098         | 0.038        | 0.015         | -0.087       | 0.152        | -0.005       | -0.006        | -0.073        | 0.012         | -0.104        | -0.119        |
| 5    | <b>0.405</b> | <b>0.272</b> | 0.023         | <b>0.665</b> | -0.136        | -0.087        | <b>0.445</b> | <b>0.309</b>  | <b>0.560</b> | <b>0.263</b>  | 0.170         | 0.112        | 0.019         | 0.115         | 0.095        | <b>0.498</b>  | 0.031        | <b>0.717</b>  | 0.009         | 0.162        | -0.002        | 0.025        | <b>0.225</b> | <b>0.317</b> | 0.193         | -0.095        | 0.043         | <b>0.325</b>  | 0.041         |
| 6    | <b>0.316</b> | <b>0.387</b> | <b>0.230</b>  | -0.004       | <b>0.251</b>  | <b>-0.232</b> | <b>0.565</b> | 0.125         | -0.071       | 0.202         | 0.151         | <b>0.468</b> | 0.189         | 0.086         | -0.067       | -0.145        | <b>0.208</b> | 0.057         | 0.127         | 0.119        | <b>0.380</b>  | -0.024       | <b>0.283</b> | -0.046       | -0.008        | 0.129         | 0.008         | 0.157         | 0.192         |
| 7    | <b>0.443</b> | <b>0.251</b> | 0.021         | <b>0.519</b> | -0.190        | -0.167        | <b>0.438</b> | 0.171         | <b>0.478</b> | <b>0.231</b>  | 0.205         | -0.074       | -0.139        | 0.170         | <b>0.277</b> | <b>0.371</b>  | -0.101       | <b>0.663</b>  | -0.146        | <b>0.262</b> | -0.072        | -0.009       | 0.193        | <b>0.253</b> | 0.091         | -0.144        | <b>0.227</b>  | <b>0.292</b>  | -0.066        |
| 8    | 0.090        | 0.047        | <b>0.305</b>  | 0.045        | <b>0.351</b>  | -0.141        | -0.052       | 0.053         | -0.013       | <b>0.210</b>  | 0.041         | <b>0.445</b> | <b>0.390</b>  | 0.146         | 0.123        | -0.044        | <b>0.320</b> | 0.009         | -0.026        | -0.137       | 0.040         | 0.042        | <b>0.223</b> | 0.005        | <b>0.253</b>  | <b>0.415</b>  | -0.012        | 0.097         | <b>0.224</b>  |
| 9    | 0.105        | 0.184        | -0.107        | <b>0.347</b> | -0.011        | 0.165         | 0.032        | 0.044         | <b>0.335</b> | -0.036        | -0.062        | -0.038       | -0.094        | -0.104        | -0.001       | <b>0.346</b>  | -0.018       | <b>0.206</b>  | -0.001        | 0.168        | -0.109        | -0.074       | 0.017        | <b>0.289</b> | -0.055        | -0.143        | 0.023         | 0.172         | 0.017         |
| 10   | <b>0.271</b> | 0.160        | <b>0.544</b>  | 0.074        | <b>0.665</b>  | -0.070        | -0.112       | -0.132        | 0.019        | 0.119         | -0.155        | <b>0.442</b> | <b>0.263</b>  | <b>0.447</b>  | -0.166       | -0.045        | <b>0.428</b> | 0.002         | 0.198         | 0.038        | <b>0.428</b>  | -0.008       | 0.131        | 0.153        | -0.107        | <b>0.280</b>  | <b>0.283</b>  | -0.079        | <b>0.543</b>  |
| 11   | 0.121        | <b>0.215</b> | <b>-0.249</b> | <b>0.293</b> | -0.181        | -0.085        | <b>0.324</b> | <b>0.311</b>  | <b>0.356</b> | 0.089         | <b>0.253</b>  | -0.098       | -0.165        | 0.003         | -0.108       | <b>0.324</b>  | -0.061       | <b>0.434</b>  | -0.117        | <b>0.227</b> | -0.102        | -0.133       | 0.081        | 0.158        | <b>0.312</b>  | -0.055        | -0.043        | 0.192         | <b>-0.242</b> |
| 12   | <b>0.212</b> | <b>0.319</b> | 0.082         | <b>0.550</b> | 0.094         | -0.020        | <b>0.259</b> | 0.116         | <b>0.382</b> | <b>0.218</b>  | -0.021        | 0.122        | <b>0.211</b>  | 0.163         | 0.090        | <b>0.364</b>  | 0.113        | <b>0.712</b>  | 0.201         | 0.197        | 0.053         | 0.008        | <b>0.215</b> | <b>0.377</b> | 0.032         | 0.106         | <b>0.451</b>  | 0.032         | 0.158         |
| 13   | 0.004        | -0.104       | <b>0.780</b>  | 0.035        | <b>0.207</b>  | -0.072        | 0.019        | 0.085         | <b>0.230</b> | <b>0.405</b>  | -0.184        | <b>0.481</b> | <b>0.387</b>  | 0.063         | -0.174       | -0.028        | <b>0.295</b> | 0.048         | <b>0.448</b>  | 0.000        | <b>0.312</b>  | -0.083       | -0.194       | <b>0.210</b> | <b>-0.241</b> | 0.167         | 0.091         | -0.120        | <b>0.798</b>  |
| 14   | 0.099        | <b>0.293</b> | -0.098        | 0.117        | <b>0.505</b>  | 0.084         | 0.151        | <b>0.250</b>  | 0.052        | <b>0.240</b>  | <b>0.295</b>  | <b>0.444</b> | <b>0.508</b>  | 0.147         | <b>0.228</b> | 0.063         | <b>0.209</b> | 0.091         | -0.032        | -0.001       | -0.096        | 0.070        | <b>0.400</b> | 0.128        | <b>0.233</b>  | <b>0.562</b>  | 0.137         | <b>0.250</b>  | 0.034         |
| 15   | <b>0.221</b> | 0.127        | <b>0.519</b>  | 0.015        | <b>0.338</b>  | -0.099        | 0.001        | -0.031        | -0.131       | <b>0.242</b>  | -0.045        | <b>0.751</b> | <b>0.717</b>  | 0.062         | -0.072       | -0.129        | <b>0.394</b> | -0.040        | 0.164         | -0.013       | <b>0.262</b>  | -0.004       | 0.181        | -0.076       | -0.008        | <b>0.272</b>  | 0.038         | -0.001        | <b>0.369</b>  |
| 16   | 0.117        | <b>0.319</b> | <b>-0.219</b> | <b>0.393</b> | -0.106        | -0.042        | <b>0.528</b> | <b>0.448</b>  | <b>0.419</b> | <b>0.242</b>  | <b>0.346</b>  | 0.014        | -0.029        | 0.016         | 0.073        | <b>0.333</b>  | -0.048       | <b>0.621</b>  | 0.005         | 0.192        | -0.140        | -0.039       | 0.197        | <b>0.281</b> | 0.115         | -0.156        | 0.123         | 0.185         | -0.169        |
| 17   | 0.159        | 0.050        | <b>-0.286</b> | -0.102       | -0.175        | <b>-0.308</b> | <b>0.449</b> | <b>0.652</b>  | -0.008       | <b>0.403</b>  | <b>0.762</b>  | -0.075       | -0.198        | -0.168        | -0.010       | -0.105        | -0.053       | 0.014         | <b>-0.241</b> | -0.005       | -0.160        | -0.015       | 0.166        | -0.166       | <b>0.305</b>  | -0.200        | <b>-0.248</b> | <b>0.316</b>  | <b>-0.361</b> |
| 18   | 0.169        | 0.015        | <b>-0.253</b> | 0.034        | -0.167        | <b>-0.276</b> | <b>0.427</b> | <b>0.588</b>  | 0.070        | <b>0.442</b>  | <b>0.718</b>  | -0.102       | -0.132        | -0.134        | -0.039       | -0.001        | -0.020       | 0.138         | -0.161        | 0.034        | -0.177        | 0.026        | 0.174        | -0.043       | <b>0.272</b>  | -0.169        | -0.072        | <b>0.311</b>  | <b>-0.295</b> |
| 19   | 0.064        | -0.008       | -0.002        | 0.086        | -0.023        | -0.012        | 0.214        | <b>0.305</b>  | <b>0.228</b> | <b>0.333</b>  | <b>0.349</b>  | 0.013        | 0.012         | -0.161        | -0.110       | 0.103         | <b>0.240</b> | 0.083         | 0.007         | -0.006       | -0.196        | -0.062       | -0.091       | 0.148        | 0.116         | -0.054        | 0.014         | <b>0.319</b>  | 0.020         |
| 20   | -0.108       | -0.128       | <b>-0.215</b> | -0.074       | <b>-0.296</b> | 0.029         | <b>0.377</b> | <b>0.469</b>  | <b>0.242</b> | <b>0.313</b>  | <b>0.455</b>  | -0.084       | -0.112        | <b>-0.230</b> | -0.041       | -0.042        | -0.046       | 0.048         | -0.014        | 0.079        | <b>-0.296</b> | -0.103       | -0.117       | 0.044        | 0.094         | <b>-0.223</b> | -0.138        | <b>0.238</b>  | -0.181        |
| 21   | 0.184        | <b>0.248</b> | <b>0.534</b>  | -0.100       | <b>0.300</b>  | -0.128        | -0.045       | <b>-0.228</b> | -0.078       | -0.023        | <b>-0.255</b> | <b>0.407</b> | 0.142         | <b>0.263</b>  | -0.155       | -0.102        | 0.185        | -0.078        | <b>0.334</b>  | 0.109        | <b>0.858</b>  | -0.091       | 0.158        | -0.003       | <b>-0.301</b> | 0.054         | 0.078         | <b>-0.209</b> | <b>0.395</b>  |
| 22   | -0.025       | -0.067       | 0.144         | -0.150       | 0.108         | 0.111         | -0.161       | <b>-0.326</b> | -0.167       | <b>-0.277</b> | -0.200        | 0.151        | <b>0.239</b>  | 0.001         | -0.052       | <b>-0.245</b> | <b>0.233</b> | <b>-0.227</b> | -0.080        | -0.155       | 0.010         | -0.050       | 0.054        | -0.137       | -0.075        | 0.101         | -0.031        | -0.088        | 0.152         |
| 23   | 0.140        | 0.083        | <b>0.586</b>  | 0.123        | <b>0.344</b>  | -0.031        | -0.043       | 0.157         | 0.204        | <b>0.206</b>  | -0.076        | <b>0.408</b> | <b>0.334</b>  | <b>0.209</b>  | -0.186       | 0.039         | <b>0.406</b> | 0.177         | 0.191         | 0.029        | <b>0.363</b>  | -0.021       | 0.086        | <b>0.214</b> | -0.123        | <b>0.245</b>  | <b>0.208</b>  | 0.044         | <b>0.562</b>  |
| 24   | 0.162        | <b>0.293</b> | <b>0.340</b>  | 0.027        | <b>0.397</b>  | -0.187        | <b>0.399</b> | <b>0.224</b>  | -0.072       | <b>0.460</b>  | 0.043         | <b>0.791</b> | <b>0.564</b>  | 0.117         | -0.091       | -0.114        | <b>0.392</b> | 0.004         | <b>0.504</b>  | 0.005        | <b>0.435</b>  | -0.010       | <b>0.232</b> | -0.031       | -0.083        | <b>0.332</b>  | -0.052        | -0.013        | <b>0.456</b>  |
| 25   | <b>0.301</b> | <b>0.375</b> | -0.158        | <b>0.530</b> | <b>-0.236</b> | -0.028        | <b>0.342</b> | <b>0.418</b>  | <b>0.746</b> | <b>0.238</b>  | <b>0.340</b>  | -0.101       | <b>-0.209</b> | -0.047        | <b>0.211</b> | <b>0.594</b>  | -0.067       | <b>0.684</b>  | -0.115        | <b>0.287</b> | -0.168        | -0.081       | 0.161        | <b>0.618</b> | 0.177         | -0.187        | <b>0.288</b>  | <b>0.251</b>  | -0.163        |
| 26   | 0.147        | <b>0.232</b> | 0.153         | 0.078        | <b>0.226</b>  | -0.111        | <b>0.617</b> | <b>0.540</b>  | 0.089        | <b>0.706</b>  | <b>0.448</b>  | <b>0.477</b> | <b>0.414</b>  | -0.030        | 0.013        | 0.083         | <b>0.218</b> | 0.113         | <b>0.248</b>  | 0.102        | -0.051        | -0.083       | <b>0.235</b> | 0.074        | 0.013         | <b>0.237</b>  | 0.034         | <b>0.325</b>  | <b>0.242</b>  |
| 27   | 0.006        | -0.112       | -0.129        | -0.081       | <b>-0.244</b> | 0.050         | <b>0.341</b> | <b>0.231</b>  | <b>0.274</b> | 0.194         | <b>0.283</b>  | -0.110       | -0.168        | <b>-0.232</b> | -0.080       | -0.019        | -0.137       | 0.027         | 0.008         | 0.148        | -0.165        | -0.091       | -0.132       | 0.088        | -0.015        | -0.181        | -0.069        | 0.189         | -0.128        |
| 28   | 0.033        | 0.148        | 0.100         | 0.102        | <b>0.611</b>  | -0.087        | 0.047        | 0.124         | -0.124       | <b>0.411</b>  | 0.060         | <b>0.501</b> | <b>0.751</b>  | 0.190         | <b>0.214</b> | -0.091        | <b>0.225</b> | 0.055         | <b>0.274</b>  | -0.084       | -0.033        | 0.193        | <b>0.301</b> | 0.024        | 0.064         | <b>0.816</b>  | 0.069         | 0.067         | <b>0.380</b>  |
| 29   | <b>0.410</b> | <b>0.424</b> | -0.072        | <b>0.740</b> | -0.089        | 0.017         | <b>0.416</b> | <b>0.286</b>  | <b>0.610</b> | <b>0.209</b>  | 0.193         | 0.035        | 0.053         | 0.035         | 0.191        | <b>0.597</b>  | 0.026        | <b>0.872</b>  | 0.080         | <b>0.299</b> | -0.086        | 0.003        | <b>0.311</b> | <b>0.531</b> | 0.061         | -0.028        | <b>0.362</b>  | <b>0.286</b>  | -0.012        |
| 30   | 0.102        | <b>0.280</b> | <b>0.277</b>  | 0.171        | <b>0.428</b>  | -0.106        | 0.204        | 0.112         | 0.012        | <b>0.380</b>  | -0.013        | <b>0.598</b> | <b>0.492</b>  | <b>0.444</b>  | -0.060       | 0.098         | <b>0.310</b> | 0.187         | <b>0.284</b>  | 0.042        | <b>0.234</b>  | -0.051       | <b>0.293</b> | 0.062        | -0.036        | <b>0.501</b>  | 0.129         | -0.007        | <b>0.406</b>  |
| 31   | 1            | <b>0.342</b> | 0.142         | <b>0.369</b> | 0.205         | -0.204        | <b>0.239</b> | 0.088         | <b>0.248</b> | 0.193         | 0.079         | <b>0.266</b> | 0.176         | 0.114         | 0.081        | 0.166         | <b>0.290</b> | <b>0.335</b>  | 0.089         | <b>0.294</b> | 0.107         | 0.126        | <b>0.323</b> | <b>0.239</b> | 0.067         | 0.127         | <b>0.238</b>  | <b>0.255</b>  | 0.138         |
| 32   | <b>0.342</b> | 1            | -0.056        | <b>0.424</b> | <b>0.230</b>  | <b>0.229</b>  | <b>0.286</b> | 0.114         | <b>0.228</b> | 0.087         | 0.136         | <b>0.240</b> | 0.146         | 0.133         | 0.146        | <b>0.454</b>  | <b>0.296</b> | <b>0.461</b>  | 0.047         | <b>0.257</b> | 0.154         | -0.042       | <b>0.677</b> | <b>0.377</b> | -0.025        | 0.079         | <b>0.405</b>  | <b>0.235</b>  | -0.072        |
| 33   | 0.142        | -0.056       | 1             | 0.025        | <b>0.205</b>  | -0.143        | -0.048       | -0.183        | 0.021        | <b>0.252</b>  | -0.321        | <b>0.463</b> | <b>0.347</b>  | <b>0.227</b>  | -0.124       | -0.065        | <b>0.326</b> | 0.018         | <b>0.352</b>  | 0.011        | <b>0.499</b>  | -0.049       | -0.077       | 0.081        | <b>-0.244</b> | 0.097         | 0.142         | -0.149        | <b>0.814</b>  |
| 34   | <b>0.369</b> | <b>0.424</b> | 0.025         | 1            | 0.014         | <b>0.224</b>  | 0.183        | 0.130         | <b>0.604</b> | 0.169         | 0.026         | 0.053        | 0.125         | 0.198         | <b>0.264</b> | <b>0.727</b>  | 0.159        | <b>0.868</b>  | 0.120         | <b>0.226</b> | -0.062        | -0.104       | <b>0.322</b> | <b>0.635</b> | 0.152         | 0.071         | <b>0.454</b>  | <b>0.333</b>  | 0.115         |
| 35   | 0.205        | <b>0.230</b> | <b>0.205</b>  | 0.014        | 1             | -0.093        | -0.045       | 0.008         | -0.163       | <b>0.348</b>  | 0.031         | <b>0.471</b> | <b>0.579</b>  | <b>0.390</b>  | -0.019       | -0.135        | <b>0.299</b> | -0.066        | <b>0.346</b>  | 0.094        | <b>0.271</b>  | <b>0.247</b> | <b>0.260</b> | 0.051        | -0.036        | <b>0.657</b>  | <b>0.262</b>  | 0.007         | <b>0.463</b>  |
| 36   | -0.204       | <b>0.22</b>  |               |              |               |               |              |               |              |               |               |              |               |               |              |               |              |               |               |              |               |              |              |              |               |               |               |               |               |

Table S1 Continued.

| Code | 61            | 62            | 63            | 64            | 65           | 66           | 67            | 68            | 69            | 70           | 71            | 72            | 73            | 74            | 75            | 76            | 77           | 78            | 79            | 80            | 81            | 82            | 83            | 84            | 85            | 86           | 87            |
|------|---------------|---------------|---------------|---------------|--------------|--------------|---------------|---------------|---------------|--------------|---------------|---------------|---------------|---------------|---------------|---------------|--------------|---------------|---------------|---------------|---------------|---------------|---------------|---------------|---------------|--------------|---------------|
| 1    | <b>0,316</b>  | 0,134         | -0,051        | <b>-0,221</b> | <b>0,273</b> | -0,001       | 0,055         | -0,006        | -0,028        | -0,070       | 0,118         | 0,082         | -0,184        | -0,100        | <b>0,230</b>  | 0,093         | -0,021       | <b>0,455</b>  | 0,043         | <b>0,288</b>  | 0,059         | 0,183         | 0,105         | <b>0,280</b>  | 0,088         | <b>0,262</b> | 0,202         |
| 2    | -0,051        | <b>0,372</b>  | 0,030         | <b>0,220</b>  | 0,060        | -0,058       | -0,050        | -0,072        | 0,003         | <b>0,458</b> | 0,027         | 0,082         | 0,033         | 0,041         | 0,080         | -0,062        | -0,008       | -0,043        | 0,061         | 0,037         | -0,082        | 0,064         | 0,069         | 0,163         | -0,030        | -0,033       | -0,129        |
| 3    | <b>-0,269</b> | -0,064        | -0,132        | -0,084        | 0,133        | 0,037        | <b>-0,237</b> | 0,176         | 0,001         | -0,086       | -0,084        | -0,151        | 0,152         | -0,121        | -0,203        | <b>-0,305</b> | 0,103        | <b>-0,263</b> | -0,173        | -0,118        | -0,047        | -0,204        | <b>-0,223</b> | -0,131        | <b>-0,236</b> | -0,109       | -0,156        |
| 4    | -0,107        | -0,091        | -0,147        | 0,132         | -0,016       | -0,075       | <b>0,207</b>  | -0,133        | -0,055        | 0,100        | -0,193        | <b>-0,269</b> | -0,022        | 0,026         | -0,085        | <b>-0,263</b> | -0,062       | -0,117        | -0,189        | <b>-0,221</b> | -0,200        | -0,193        | -0,157        | -0,114        | -0,196        | -0,076       | <b>-0,231</b> |
| 5    | 0,047         | -0,153        | 0,105         | <b>0,420</b>  | <b>0,231</b> | 0,054        | -0,071        | 0,094         | <b>0,351</b>  | 0,192        | 0,086         | -0,130        | <b>0,249</b>  | 0,032         | -0,016        | -0,039        | -0,063       | -0,127        | 0,046         | 0,198         | 0,012         | 0,017         | -0,006        | -0,020        | -0,016        | -0,034       | 0,005         |
| 6    | <b>0,364</b>  | 0,175         | 0,031         | -0,041        | <b>0,393</b> | -0,028       | -0,088        | 0,044         | -0,012        | 0,018        | 0,005         | 0,102         | -0,069        | 0,008         | <b>0,207</b>  | 0,110         | 0,032        | <b>0,257</b>  | 0,051         | <b>0,213</b>  | 0,060         | 0,058         | 0,179         | 0,179         | 0,101         | 0,091        | 0,094         |
| 7    | 0,148         | -0,120        | 0,022         | <b>0,447</b>  | 0,124        | -0,175       | <b>-0,296</b> | <b>-0,232</b> | <b>0,291</b>  | 0,082        | -0,003        | 0,032         | <b>0,227</b>  | -0,091        | 0,064         | -0,019        | -0,023       | -0,138        | 0,044         | <b>0,248</b>  | 0,055         | 0,143         | -0,038        | -0,148        | -0,049        | -0,014       | -0,123        |
| 8    | <b>0,300</b>  | <b>0,293</b>  | 0,027         | -0,029        | <b>0,260</b> | 0,100        | -0,196        | 0,155         | 0,144         | 0,008        | 0,000         | 0,095         | -0,065        | <b>0,208</b>  | 0,202         | 0,158         | <b>0,247</b> | <b>0,320</b>  | -0,011        | 0,115         | 0,156         | -0,065        | 0,041         | 0,190         | 0,057         | -0,070       | <b>0,283</b>  |
| 9    | -0,177        | -0,042        | 0,047         | <b>0,239</b>  | -0,048       | -0,037       | <b>0,218</b>  | -0,087        | 0,074         | 0,029        | -0,114        | -0,114        | -0,012        | 0,103         | -0,130        | -0,034        | -0,067       | -0,068        | 0,029         | 0,011         | -0,121        | -0,162        | -0,023        | 0,184         | 0,044         | <b>0,319</b> | -0,177        |
| 10   | <b>0,552</b>  | <b>0,637</b>  | 0,102         | -0,004        | <b>0,226</b> | 0,151        | -0,128        | <b>0,235</b>  | 0,178         | <b>0,274</b> | 0,135         | <b>0,314</b>  | -0,052        | <b>0,261</b>  | <b>0,439</b>  | <b>0,419</b>  | 0,166        | <b>0,542</b>  | <b>0,258</b>  | <b>0,371</b>  | <b>0,309</b>  | 0,134         | <b>0,401</b>  | <b>0,344</b>  | <b>0,305</b>  | <b>0,220</b> | <b>0,368</b>  |
| 11   | <b>-0,232</b> | <b>-0,238</b> | -0,186        | <b>0,264</b>  | 0,018        | 0,034        | 0,031         | 0,200         | 0,189         | -0,047       | -0,062        | <b>-0,237</b> | <b>0,233</b>  | -0,028        | <b>-0,249</b> | <b>-0,366</b> | -0,197       | <b>-0,328</b> | <b>-0,225</b> | -0,168        | -0,191        | <b>-0,209</b> | <b>-0,228</b> | <b>-0,236</b> | <b>-0,301</b> | -0,059       | <b>-0,223</b> |
| 12   | 0,135         | 0,070         | <b>0,255</b>  | <b>0,464</b>  | 0,159        | 0,011        | -0,048        | -0,016        | <b>0,471</b>  | 0,155        | <b>0,235</b>  | 0,106         | 0,071         | 0,039         | 0,188         | 0,058         | -0,133       | -0,103        | 0,194         | 0,132         | 0,009         | <b>0,211</b>  | 0,143         | 0,086         | 0,105         | -0,063       | 0,133         |
| 13   | <b>0,303</b>  | 0,116         | <b>0,577</b>  | -0,027        | -0,006       | <b>0,266</b> | -0,167        | <b>0,244</b>  | <b>0,416</b>  | 0,070        | <b>0,420</b>  | <b>0,283</b>  | 0,102         | <b>0,305</b>  | 0,063         | <b>0,616</b>  | <b>0,417</b> | <b>0,380</b>  | <b>0,558</b>  | <b>0,271</b>  | <b>0,508</b>  | -0,056        | <b>0,366</b>  | 0,023         | <b>0,535</b>  | 0,077        | <b>0,371</b>  |
| 14   | -0,012        | <b>0,369</b>  | -0,073        | 0,159         | <b>0,398</b> | 0,166        | -0,112        | 0,153         | <b>0,206</b>  | -0,011       | -0,038        | 0,123         | 0,012         | 0,067         | 0,174         | -0,115        | 0,097        | 0,203         | -0,166        | 0,056         | -0,164        | -0,124        | 0,051         | <b>0,382</b>  | -0,037        | 0,086        | <b>0,240</b>  |
| 15   | <b>0,460</b>  | 0,197         | 0,119         | -0,134        | <b>0,314</b> | 0,006        | <b>-0,266</b> | 0,153         | 0,094         | -0,006       | -0,005        | 0,070         | <b>-0,258</b> | 0,129         | <b>0,236</b>  | <b>0,255</b>  | <b>0,437</b> | <b>0,465</b>  | 0,058         | <b>0,213</b>  | 0,185         | -0,032        | 0,138         | <b>0,215</b>  | 0,130         | -0,006       | <b>0,318</b>  |
| 16   | <b>-0,222</b> | -0,182        | -0,051        | <b>0,477</b>  | 0,082        | 0,050        | 0,071         | -0,014        | <b>0,274</b>  | 0,054        | -0,077        | -0,199        | 0,128         | -0,020        | -0,203        | <b>-0,307</b> | -0,124       | <b>-0,354</b> | -0,164        | -0,200        | <b>-0,210</b> | <b>-0,209</b> | -0,188        | -0,173        | <b>-0,210</b> | -0,122       | <b>-0,220</b> |
| 17   | -0,194        | -0,190        | <b>-0,320</b> | -0,094        | 0,059        | 0,071        | -0,112        | -0,021        | <b>-0,309</b> | -0,102       | <b>-0,240</b> | <b>-0,354</b> | 0,176         | <b>-0,271</b> | <b>-0,249</b> | <b>-0,409</b> | -0,143       | <b>-0,245</b> | <b>-0,408</b> | <b>-0,340</b> | -0,117        | <b>-0,207</b> | <b>-0,389</b> | <b>-0,281</b> | <b>-0,353</b> | -0,102       | <b>-0,291</b> |
| 18   | -0,129        | -0,172        | <b>-0,275</b> | 0,042         | 0,032        | 0,004        | -0,106        | 0,023         | <b>-0,242</b> | -0,020       | <b>-0,228</b> | <b>-0,278</b> | 0,112         | <b>-0,239</b> | -0,128        | <b>-0,324</b> | -0,126       | <b>-0,258</b> | <b>-0,333</b> | <b>-0,291</b> | -0,097        | -0,112        | <b>-0,288</b> | <b>-0,240</b> | <b>-0,284</b> | -0,112       | <b>-0,263</b> |
| 19   | <b>-0,244</b> | -0,045        | -0,002        | 0,086         | -0,007       | -0,037       | -0,065        | 0,024         | 0,179         | -0,074       | -0,075        | -0,016        | 0,102         | -0,119        | <b>-0,341</b> | -0,120        | 0,067        | -0,117        | -0,074        | -0,123        | 0,028         | <b>-0,361</b> | -0,133        | -0,133        | -0,091        | 0,058        | -0,155        |
| 20   | <b>-0,464</b> | <b>-0,358</b> | -0,031        | 0,032         | -0,087       | 0,095        | -0,048        | -0,008        | 0,077         | -0,147       | -0,047        | -0,179        | <b>0,239</b>  | -0,175        | <b>-0,524</b> | <b>-0,290</b> | -0,018       | <b>-0,317</b> | -0,152        | <b>-0,324</b> | -0,084        | <b>-0,357</b> | <b>-0,280</b> | <b>-0,377</b> | -0,200        | -0,077       | <b>-0,243</b> |
| 21   | <b>0,575</b>  | <b>0,238</b>  | 0,179         | -0,155        | <b>0,296</b> | 0,098        | -0,048        | 0,121         | 0,063         | 0,089        | 0,155         | 0,142         | -0,165        | 0,189         | <b>0,355</b>  | <b>0,391</b>  | 0,178        | <b>0,471</b>  | <b>0,260</b>  | <b>0,211</b>  | <b>0,362</b>  | 0,191         | <b>0,346</b>  | <b>0,262</b>  | <b>0,256</b>  | 0,192        | <b>0,280</b>  |
| 22   | 0,204         | 0,078         | -0,108        | <b>-0,262</b> | 0,134        | 0,027        | -0,153        | <b>0,333</b>  | 0,052         | -0,117       | 0,060         | 0,132         | -0,198        | 0,068         | 0,196         | 0,099         | 0,004        | <b>0,288</b>  | -0,040        | <b>0,276</b>  | 0,088         | -0,013        | 0,109         | <b>0,310</b>  | 0,035         | -0,023       | <b>0,238</b>  |
| 23   | <b>0,380</b>  | <b>0,351</b>  | <b>0,274</b>  | 0,018         | 0,194        | <b>0,410</b> | -0,202        | <b>0,289</b>  | <b>0,367</b>  | 0,157        | <b>0,508</b>  | <b>0,261</b>  | 0,201         | 0,145         | 0,196         | <b>0,359</b>  | 0,109        | <b>0,330</b>  | <b>0,299</b>  | <b>0,257</b>  | <b>0,328</b>  | 0,073         | <b>0,279</b>  | <b>0,206</b>  | <b>0,260</b>  | 0,039        | <b>0,447</b>  |
| 24   | <b>0,263</b>  | <b>0,226</b>  | <b>0,388</b>  | -0,037        | <b>0,342</b> | 0,026        | -0,081        | 0,024         | 0,046         | 0,109        | 0,041         | 0,095         | -0,054        | <b>0,263</b>  | 0,194         | <b>0,302</b>  | 0,134        | <b>0,407</b>  | <b>0,254</b>  | 0,082         | 0,089         | -0,026        | <b>0,387</b>  | <b>0,250</b>  | <b>0,369</b>  | -0,010       | 0,187         |
| 25   | -0,192        | <b>-0,258</b> | -0,060        | <b>0,688</b>  | 0,081        | 0,057        | -0,173        | 0,000         | <b>0,433</b>  | -0,008       | 0,037         | -0,125        | <b>0,378</b>  | <b>-0,207</b> | <b>-0,245</b> | <b>-0,262</b> | -0,043       | -0,203        | -0,111        | 0,024         | -0,164        | -0,169        | <b>-0,225</b> | -0,153        | <b>-0,220</b> | 0,142        | -0,153        |
| 26   | -0,043        | 0,093         | <b>0,262</b>  | 0,146         | <b>0,305</b> | 0,003        | -0,136        | 0,014         | 0,034         | -0,015       | 0,020         | 0,022         | 0,099         | 0,044         | -0,085        | 0,058         | 0,066        | 0,052         | 0,103         | -0,049        | -0,027        | -0,136        | 0,080         | -0,001        | 0,144         | -0,001       | -0,011        |
| 27   | <b>-0,363</b> | <b>-0,236</b> | 0,094         | 0,014         | -0,043       | 0,132        | -0,068        | 0,011         | 0,123         | -0,165       | 0,147         | -0,012        | <b>0,320</b>  | -0,088        | <b>-0,443</b> | -0,179        | 0,077        | <b>-0,270</b> | 0,060         | -0,204        | 0,028         | <b>-0,222</b> | -0,183        | <b>-0,362</b> | -0,116        | -0,043       | -0,203        |
| 28   | 0,059         | <b>0,431</b>  | <b>0,346</b>  | 0,066         | <b>0,289</b> | 0,014        | -0,164        | 0,043         | 0,124         | 0,194        | 0,037         | <b>0,342</b>  | -0,087        | <b>0,352</b>  | <b>0,294</b>  | <b>0,207</b>  | 0,126        | 0,124         | 0,200         | -0,050        | 0,000         | -0,068        | <b>0,418</b>  | <b>0,384</b>  | <b>0,349</b>  | 0,044        | 0,115         |
| 29   | -0,010        | -0,097        | 0,065         | <b>0,635</b>  | <b>0,235</b> | -0,009       | -0,034        | -0,015        | <b>0,481</b>  | <b>0,221</b> | 0,068         | 0,026         | <b>0,226</b>  | -0,169        | -0,008        | -0,097        | -0,115       | -0,195        | 0,006         | 0,186         | -0,078        | 0,136         | -0,077        | -0,026        | -0,054        | -0,038       | -0,054        |
| 30   | <b>0,290</b>  | <b>0,328</b>  | <b>0,333</b>  | 0,181         | <b>0,253</b> | -0,065       | -0,200        | -0,004        | 0,165         | <b>0,285</b> | 0,086         | <b>0,224</b>  | -0,065        | <b>0,347</b>  | <b>0,369</b>  | <b>0,226</b>  | <b>0,233</b> | <b>0,241</b>  | <b>0,303</b>  | 0,055         | 0,081         | -0,059        | <b>0,521</b>  | <b>0,267</b>  | <b>0,318</b>  | 0,050        | 0,044         |
| 31   | <b>0,419</b>  | <b>0,215</b>  | 0,050         | 0,176         | <b>0,367</b> | 0,010        | <b>-0,294</b> | 0,103         | 0,143         | 0,139        | 0,043         | 0,134         | 0,148         | -0,040        | <b>0,316</b>  | 0,122         | -0,086       | <b>0,218</b>  | 0,082         | <b>0,360</b>  | 0,138         | 0,185         | 0,105         | 0,168         | 0,097         | 0,097        | 0,105         |
| 32   | 0,086         | 0,186         | -0,080        | <b>0,502</b>  | <b>0,529</b> | -0,037       | -0,037        | -0,042        | 0,203         | 0,005        | 0,026         | -0,003        | 0,100         | -0,024        | 0,152         | -0,112        | -0,135       | 0,127         | -0,096        | <b>0,305</b>  | <b>-0,256</b> | -0,016        | -0,008        | <b>0,530</b>  | -0,121        | 0,062        | 0,126         |
| 33   | <b>0,710</b>  | 0,177         | <b>0,350</b>  | -0,085        | 0,089        | 0,069        | -0,190        | 0,203         | <b>0,233</b>  | 0,094        | <b>0,262</b>  | <b>0,304</b>  | -0,127        | <b>0,221</b>  | <b>0,339</b>  | <b>0,732</b>  | <b>0,393</b> | <b>0,519</b>  | <b>0,479</b>  | <b>0,450</b>  | <b>0,627</b>  | 0,132         | <b>0,416</b>  | 0,094         | <b>0,491</b>  | 0,073        | <b>0,401</b>  |
| 34   | 0,142         | 0,007         | 0,178         | <b>0,736</b>  | <b>0,214</b> | -0,008       | -0,007        | 0,089         | <b>0,541</b>  | <b>0,213</b> | <b>0,209</b>  | 0,047         | <b>0,243</b>  | 0,041         | 0,198         | 0,068         | -0,138       | -0,090        | 0,147         | <b>0,400</b>  | -0,089        | 0,177         | 0,094         | <b>0,219</b>  | 0,064         | 0,027        | 0,169         |
| 35   | <b>0,252</b>  | <b>0,895</b>  | <b>0,226</b>  | -0,024        | <b>0,265</b> | 0,039        | -0,064        | 0,082         | 0,061         | <b>0,299</b> | -0,024        | <b>0,455</b>  | -0,080        | <b>0,308</b>  | <b>0,505</b>  | <b>0,338</b>  | 0,056        | <b>0,340</b>  | <b>0,243</b>  | 0,104         | 0,109         | 0,009         | <b>0,515</b>  | <b>0,508</b>  | <b>0,433</b>  | <b>0,278</b> | 0,197         |
| 36   | <b>-0,243</b> | -0,097        | -0,073        | <b>0,278</b>  | -0,128       | 0,000        | <b>0,411</b>  | 0,064         | <b>0,229</b>  | 0,009        | 0,148         | -0,111        | 0,089         | -0,001        | -0,160        | -0,108        | -0,036       | -0,113        | -0,027        | 0,145         | <b>-0,257</b> | -0,156        | -0,101        | 0,176         | -0,166        | 0,050        | 0,061         |
| 37   | -0,043        | -0,111        | -0,013        | 0,196         | <b>0,328</b> | -0,034       | -0,095        | -0,038        | 0,063         | -0,031       | -0,142        | -0,011        | 0,150         | -0,106        | -0,097        | -0,117        | -0,065       | -0,071        | -0,086        | 0,090         | -0,138        | -0,100        | -0,068        | -0,059        | -0,046        | -0,034       | -0,113        |
| 38   | <b>-0,257</b> | -0,033        | -0,039        | <b>0,244</b>  | 0,116        | 0,161        | -0,013        | -0,035        | 0,023         | -0,067       | 0,035         | -0,181        | <b>0,355</b>  | -0,113        | <b>-0,246</b> | <b>-0,270</b> | -0,146       | -0,149        | <b>-0,210</b> | <b>-0,237</b> | -0,123        | <b>-0,218</b> | <b>-0,260</b> | -0,193        | -0,194        | -0,063       | -0,146        |
| 39   | -0,105        | -0,182        | 0,141         | <b></b>       |              |              |               |               |               |              |               |               |               |               |               |               |              |               |               |               |               |               |               |               |               |              |               |

Table S1 Continued.

| Code | 1             | 2            | 3             | 4             | 5            | 6            | 7             | 8            | 9            | 10           | 11            | 12           | 13            | 14           | 15            | 16            | 17            | 18            | 19            | 20            | 21            | 22            | 23           | 24           | 25            | 26           | 27            | 28           | 29           | 30           |
|------|---------------|--------------|---------------|---------------|--------------|--------------|---------------|--------------|--------------|--------------|---------------|--------------|---------------|--------------|---------------|---------------|---------------|---------------|---------------|---------------|---------------|---------------|--------------|--------------|---------------|--------------|---------------|--------------|--------------|--------------|
| 45   | -0.088        | <b>0.319</b> | -0.067        | 0.110         | 0.115        | 0.086        | 0.170         | 0.146        | -0.104       | <b>0.447</b> | 0.003         | 0.163        | 0.063         | 0.147        | 0.062         | 0.016         | -0.168        | -0.134        | -0.161        | <b>-0.230</b> | <b>0.263</b>  | 0.001         | <b>0.209</b> | 0.117        | -0.047        | -0.030       | <b>-0.232</b> | 0.190        | 0.035        | <b>0.444</b> |
| 46   | -0.072        | -0.015       | -0.023        | 0.005         | 0.095        | -0.067       | <b>0.277</b>  | 0.123        | -0.001       | -0.166       | -0.108        | 0.090        | -0.174        | <b>0.228</b> | -0.072        | 0.073         | -0.010        | -0.039        | -0.110        | -0.041        | -0.155        | -0.052        | -0.186       | -0.091       | <b>0.211</b>  | 0.013        | -0.080        | <b>0.214</b> | 0.191        | -0.060       |
| 47   | -0.099        | <b>0.242</b> | 0.122         | 0.069         | <b>0.498</b> | -0.145       | <b>0.371</b>  | -0.044       | <b>0.346</b> | -0.045       | <b>0.324</b>  | <b>0.364</b> | -0.028        | 0.063        | -0.129        | <b>0.333</b>  | -0.105        | -0.001        | 0.103         | -0.042        | -0.102        | <b>-0.245</b> | 0.039        | -0.114       | <b>0.594</b>  | 0.083        | -0.019        | -0.091       | <b>0.597</b> | 0.098        |
| 48   | 0.101         | 0.117        | -0.049        | -0.084        | 0.031        | <b>0.208</b> | -0.101        | <b>0.320</b> | -0.018       | <b>0.428</b> | -0.061        | 0.113        | <b>0.295</b>  | <b>0.209</b> | <b>0.394</b>  | -0.048        | -0.053        | -0.020        | <b>0.240</b>  | -0.046        | 0.185         | <b>0.233</b>  | <b>0.406</b> | <b>0.392</b> | -0.067        | <b>0.218</b> | -0.137        | <b>0.225</b> | 0.026        | <b>0.310</b> |
| 49   | -0.139        | <b>0.220</b> | 0.059         | <b>0.222</b>  | <b>0.717</b> | 0.057        | <b>0.663</b>  | 0.009        | <b>0.206</b> | 0.002        | <b>0.434</b>  | <b>0.712</b> | 0.048         | 0.091        | -0.040        | <b>0.621</b>  | 0.014         | 0.138         | 0.083         | 0.048         | -0.078        | <b>-0.227</b> | 0.177        | 0.004        | <b>0.684</b>  | 0.113        | 0.027         | 0.055        | <b>0.872</b> | 0.187        |
| 50   | 0.073         | -0.030       | <b>-0.240</b> | 0.098         | 0.009        | 0.127        | -0.146        | -0.026       | -0.001       | 0.198        | -0.117        | 0.201        | <b>0.448</b>  | -0.032       | 0.164         | 0.005         | <b>-0.241</b> | -0.161        | 0.007         | -0.014        | <b>0.334</b>  | -0.080        | 0.191        | <b>0.504</b> | -0.115        | <b>0.248</b> | 0.008         | <b>0.274</b> | 0.080        | <b>0.284</b> |
| 51   | 0.107         | -0.025       | -0.021        | 0.038         | 0.162        | 0.119        | <b>0.262</b>  | -0.137       | 0.168        | 0.038        | <b>0.227</b>  | 0.197        | 0.000         | -0.001       | -0.013        | 0.192         | -0.005        | 0.034         | -0.006        | 0.079         | 0.109         | -0.155        | 0.029        | 0.005        | <b>0.287</b>  | 0.102        | 0.148         | -0.084       | <b>0.299</b> | 0.042        |
| 52   | <b>0.341</b>  | -0.031       | <b>-0.287</b> | 0.015         | -0.002       | <b>0.380</b> | -0.072        | 0.040        | -0.109       | <b>0.428</b> | -0.102        | 0.053        | <b>0.312</b>  | -0.096       | <b>0.262</b>  | -0.140        | -0.160        | -0.177        | -0.196        | <b>-0.296</b> | <b>0.858</b>  | 0.010         | <b>0.363</b> | <b>0.435</b> | -0.168        | -0.051       | -0.165        | -0.033       | -0.086       | <b>0.234</b> |
| 53   | -0.021        | -0.060       | -0.038        | -0.087        | 0.025        | -0.024       | -0.009        | 0.042        | -0.074       | -0.008       | -0.133        | 0.008        | -0.083        | 0.070        | -0.004        | -0.039        | -0.015        | 0.026         | -0.062        | -0.103        | -0.091        | -0.050        | -0.021       | -0.010       | -0.081        | -0.083       | -0.091        | 0.193        | 0.003        | -0.051       |
| 54   | 0.138         | 0.120        | 0.057         | 0.152         | <b>0.225</b> | <b>0.283</b> | 0.193         | <b>0.223</b> | 0.017        | 0.131        | 0.081         | <b>0.215</b> | -0.194        | <b>0.400</b> | 0.181         | 0.197         | 0.166         | 0.174         | -0.091        | -0.117        | 0.158         | 0.054         | 0.086        | <b>0.232</b> | 0.161         | <b>0.235</b> | -0.132        | <b>0.301</b> | <b>0.311</b> | <b>0.293</b> |
| 55   | -0.065        | 0.129        | -0.117        | -0.005        | <b>0.317</b> | -0.046       | <b>0.253</b>  | 0.005        | <b>0.289</b> | 0.153        | 0.158         | <b>0.377</b> | <b>0.210</b>  | 0.128        | -0.076        | <b>0.281</b>  | -0.166        | -0.043        | 0.148         | 0.044         | -0.003        | -0.137        | <b>0.214</b> | -0.031       | <b>0.618</b>  | 0.074        | 0.088         | 0.024        | <b>0.531</b> | 0.062        |
| 56   | -0.138        | 0.078        | <b>0.568</b>  | -0.006        | 0.193        | -0.008       | 0.091         | <b>0.253</b> | -0.055       | -0.107       | <b>0.312</b>  | 0.032        | <b>-0.241</b> | <b>0.233</b> | -0.008        | 0.115         | <b>0.305</b>  | <b>0.272</b>  | 0.116         | 0.094         | <b>-0.301</b> | -0.075        | -0.123       | -0.083       | 0.177         | 0.013        | -0.015        | 0.064        | 0.061        | -0.036       |
| 57   | -0.010        | 0.166        | -0.017        | -0.073        | -0.095       | 0.129        | -0.144        | <b>0.415</b> | -0.143       | <b>0.280</b> | <b>-0.255</b> | 0.106        | 0.167         | <b>0.562</b> | <b>0.272</b>  | -0.156        | -0.200        | -0.169        | -0.054        | <b>-0.223</b> | 0.054         | 0.101         | <b>0.245</b> | <b>0.332</b> | -0.187        | <b>0.237</b> | -0.181        | <b>0.816</b> | -0.028       | <b>0.501</b> |
| 58   | 0.088         | 0.141        | -0.125        | 0.012         | 0.043        | 0.008        | <b>0.227</b>  | -0.012       | 0.023        | <b>0.283</b> | -0.043        | <b>0.451</b> | 0.091         | 0.137        | 0.038         | 0.123         | <b>-0.248</b> | -0.072        | 0.014         | -0.138        | 0.078         | -0.031        | <b>0.208</b> | -0.052       | <b>0.288</b>  | 0.034        | -0.069        | 0.069        | <b>0.362</b> | 0.129        |
| 59   | 0.038         | <b>0.238</b> | <b>0.459</b>  | -0.104        | <b>0.325</b> | 0.157        | <b>0.292</b>  | 0.097        | 0.172        | -0.079       | 0.192         | 0.032        | -0.120        | <b>0.250</b> | -0.001        | 0.185         | <b>0.316</b>  | <b>0.311</b>  | <b>0.319</b>  | <b>0.238</b>  | <b>-0.209</b> | -0.088        | 0.044        | -0.013       | <b>0.251</b>  | <b>0.325</b> | 0.189         | 0.067        | <b>0.286</b> | -0.007       |
| 60   | 0.190         | 0.011        | <b>-0.207</b> | -0.119        | 0.041        | 0.192        | -0.066        | <b>0.224</b> | 0.017        | <b>0.543</b> | <b>-0.242</b> | 0.158        | <b>0.798</b>  | 0.034        | <b>0.369</b>  | -0.169        | <b>-0.361</b> | <b>-0.295</b> | 0.020         | -0.181        | <b>0.395</b>  | 0.152         | <b>0.562</b> | <b>0.456</b> | -0.163        | <b>0.242</b> | -0.128        | <b>0.380</b> | -0.012       | <b>0.406</b> |
| 61   | <b>0.316</b>  | -0.051       | <b>-0.269</b> | -0.107        | 0.047        | <b>0.364</b> | 0.148         | <b>0.300</b> | -0.177       | <b>0.552</b> | <b>-0.232</b> | 0.135        | <b>0.303</b>  | -0.012       | <b>0.460</b>  | <b>-0.222</b> | -0.194        | -0.129        | <b>-0.244</b> | <b>-0.464</b> | <b>0.575</b>  | 0.204         | <b>0.380</b> | <b>0.263</b> | -0.192        | -0.043       | <b>-0.363</b> | 0.059        | -0.010       | <b>0.290</b> |
| 62   | -0.134        | <b>0.372</b> | -0.064        | -0.091        | -0.153       | 0.175        | -0.120        | <b>0.293</b> | -0.042       | <b>0.637</b> | <b>-0.238</b> | 0.070        | 0.116         | <b>0.369</b> | 0.197         | -0.182        | -0.190        | -0.172        | -0.045        | <b>-0.358</b> | <b>0.238</b>  | 0.078         | <b>0.351</b> | <b>0.226</b> | <b>-0.258</b> | 0.093        | <b>-0.236</b> | <b>0.431</b> | -0.097       | <b>0.328</b> |
| 63   | -0.051        | 0.030        | -0.132        | -0.147        | 0.105        | 0.031        | 0.022         | 0.027        | 0.047        | 0.102        | -0.186        | <b>0.255</b> | <b>0.577</b>  | -0.073       | 0.119         | -0.051        | <b>-0.320</b> | <b>-0.275</b> | -0.002        | -0.031        | 0.179         | -0.108        | <b>0.274</b> | <b>0.388</b> | -0.060        | <b>0.262</b> | 0.094         | <b>0.346</b> | 0.065        | <b>0.333</b> |
| 64   | <b>-0.221</b> | <b>0.220</b> | -0.084        | 0.132         | <b>0.420</b> | -0.041       | <b>0.447</b>  | -0.029       | <b>0.239</b> | -0.004       | <b>0.264</b>  | <b>0.464</b> | -0.027        | 0.159        | -0.134        | <b>0.477</b>  | -0.094        | 0.042         | 0.086         | 0.032         | -0.155        | <b>-0.262</b> | 0.018        | -0.037       | <b>0.688</b>  | 0.146        | 0.014         | 0.066        | <b>0.635</b> | 0.181        |
| 65   | <b>0.273</b>  | 0.060        | 0.133         | -0.016        | <b>0.231</b> | <b>0.393</b> | 0.124         | <b>0.260</b> | -0.048       | <b>0.226</b> | 0.018         | 0.159        | -0.006        | <b>0.398</b> | <b>0.314</b>  | 0.082         | 0.059         | 0.032         | -0.007        | -0.087        | <b>0.296</b>  | 0.134         | 0.194        | <b>0.342</b> | 0.081         | <b>0.305</b> | -0.043        | <b>0.289</b> | <b>0.235</b> | <b>0.253</b> |
| 66   | -0.001        | -0.058       | 0.037         | -0.075        | 0.054        | -0.028       | -0.175        | 0.100        | -0.037       | 0.151        | 0.034         | 0.011        | <b>0.266</b>  | 0.166        | 0.006         | 0.050         | 0.071         | 0.004         | -0.037        | 0.095         | 0.098         | 0.027         | <b>0.410</b> | 0.026        | 0.057         | 0.003        | 0.132         | 0.014        | -0.009       | -0.065       |
| 67   | 0.055         | -0.050       | <b>-0.237</b> | <b>0.207</b>  | -0.071       | -0.088       | <b>-0.296</b> | -0.196       | <b>0.218</b> | -0.128       | 0.031         | -0.048       | -0.167        | -0.112       | <b>-0.266</b> | 0.071         | -0.112        | -0.106        | -0.065        | -0.048        | -0.048        | -0.153        | -0.202       | -0.081       | -0.173        | -0.136       | -0.068        | -0.164       | -0.034       | -0.200       |
| 68   | -0.006        | -0.072       | 0.176         | -0.133        | 0.094        | 0.044        | <b>-0.232</b> | 0.155        | -0.087       | <b>0.235</b> | 0.200         | -0.016       | <b>0.244</b>  | 0.153        | 0.153         | -0.014        | -0.021        | 0.023         | 0.024         | -0.008        | 0.121         | <b>0.333</b>  | <b>0.289</b> | 0.024        | 0.000         | 0.014        | 0.011         | 0.043        | -0.015       | -0.004       |
| 69   | -0.028        | 0.003        | 0.001         | -0.055        | <b>0.351</b> | -0.012       | <b>0.291</b>  | 0.144        | 0.074        | 0.178        | 0.189         | <b>0.471</b> | <b>0.416</b>  | <b>0.206</b> | 0.094         | <b>0.274</b>  | <b>-0.309</b> | <b>-0.242</b> | 0.179         | 0.077         | 0.063         | 0.052         | <b>0.367</b> | 0.046        | <b>0.433</b>  | 0.034        | 0.123         | 0.124        | <b>0.481</b> | 0.165        |
| 70   | -0.070        | <b>0.458</b> | -0.086        | 0.100         | 0.192        | 0.018        | 0.082         | 0.008        | 0.029        | <b>0.274</b> | -0.047        | 0.155        | 0.070         | -0.011       | -0.006        | 0.054         | -0.102        | -0.020        | -0.074        | -0.147        | 0.089         | -0.117        | 0.157        | 0.109        | -0.008        | -0.015       | -0.165        | 0.194        | <b>0.221</b> | <b>0.285</b> |
| 71   | 0.118         | 0.027        | -0.084        | -0.193        | 0.086        | 0.005        | -0.003        | 0.000        | -0.114       | 0.135        | -0.062        | <b>0.235</b> | <b>0.420</b>  | -0.038       | -0.005        | -0.077        | <b>-0.240</b> | <b>-0.228</b> | -0.075        | -0.047        | 0.155         | 0.060         | <b>0.508</b> | 0.041        | 0.037         | 0.020        | -0.147        | 0.037        | 0.068        | 0.086        |
| 72   | 0.082         | 0.082        | -0.151        | <b>-0.269</b> | -0.130       | 0.102        | 0.032         | 0.095        | -0.114       | <b>0.314</b> | <b>-0.237</b> | 0.106        | <b>0.283</b>  | 0.123        | 0.070         | -0.199        | <b>-0.354</b> | <b>-0.278</b> | -0.016        | -0.179        | 0.142         | 0.132         | <b>0.261</b> | 0.095        | -0.125        | 0.022        | -0.012        | <b>0.342</b> | 0.026        | <b>0.224</b> |
| 73   | -0.184        | 0.033        | 0.152         | -0.022        | <b>0.249</b> | -0.069       | <b>0.227</b>  | -0.065       | -0.012       | -0.052       | <b>0.233</b>  | 0.071        | 0.102         | 0.012        | <b>-0.258</b> | 0.128         | 0.176         | 0.112         | 0.102         | <b>0.239</b>  | -0.165        | -0.198        | 0.201        | -0.054       | <b>0.378</b>  | 0.099        | <b>0.320</b>  | -0.087       | <b>0.226</b> | -0.065       |
| 74   | -0.100        | 0.041        | -0.121        | 0.026         | 0.032        | 0.008        | -0.091        | <b>0.208</b> | 0.103        | <b>0.261</b> | -0.028        | 0.039        | <b>0.305</b>  | 0.067        | 0.129         | -0.020        | <b>-0.271</b> | <b>-0.239</b> | -0.119        | -0.175        | 0.189         | 0.068         | 0.145        | <b>0.263</b> | <b>-0.207</b> | 0.044        | -0.088        | <b>0.352</b> | -0.169       | <b>0.347</b> |
| 75   | <b>0.230</b>  | 0.080        | -0.203        | -0.085        | -0.016       | <b>0.207</b> | 0.064         | 0.202        | -0.130       | <b>0.439</b> | <b>-0.249</b> | 0.188        | 0.063         | 0.174        | <b>0.236</b>  | -0.203        | <b>-0.249</b> | -0.128        | <b>-0.341</b> | <b>-0.524</b> | <b>0.355</b>  | 0.196         | 0.196        | 0.194        | <b>-0.245</b> | -0.085       | <b>-0.443</b> | <b>0.294</b> | -0.008       | <b>0.369</b> |
| 76   | 0.093         | -0.062       | <b>-0.305</b> | <b>-0.263</b> | -0.039       | 0.110        | -0.019        | 0.158        | -0.034       | <b>0.419</b> | <b>-0.366</b> | 0.058        | <b>0.616</b>  | -0.115       | <b>0.255</b>  | <b>-0.307</b> | <b>-0.409</b> | <b>-0.324</b> | -0.120        | <b>-0.290</b> | <b>0.391</b>  | 0.099         | <b>0.359</b> | <b>0.302</b> | <b>-0.262</b> | 0.058        | -0.179        | <b>0.207</b> | -0.097       | <b>0.226</b> |
| 77   | -0.021        | -0.008       | 0.103         | -0.062        | -0.063       | 0.032        | -0.023        | <b>0.247</b> | -0.067       | 0.166        | -0.197        | -0.133       | <b>0.417</b>  | 0.097        | <b>0.437</b>  | -0.124        | -0.143        | -0.126        | 0.067         | -0.018        | 0.178         | 0.004         | 0.109        | 0.134        | -0.043        | 0.066        | 0.077         | 0.126        | -0.115       | <b>0.233</b> |
| 78   | <b>0.455</b>  | -0.043       | <b>-0.263</b> | -0.117        | -0.127       | <b>0.257</b> | -0.138        | <b>0.320</b> | -0.068       | <b>0.542</b> | <b>-0.328</b> | -0.103       | <b>0.380</b>  | 0.203        | <b>0.465</b>  | <b>-0.354</b> | <b>-0.245</b> | <b>-0.258</b> | -0.117        | <b>-0.317</b> | <b>0.471</b>  | <b>0.288</b>  | <b>0.330</b> | <b>0.407</b> | -0.203        | 0.052        | <b>-0.270</b> | 0.124        | -0.195       | <b>0.241</b> |
| 79   | 0.043         | 0.061        | -0.173        | -0.189        | 0.046        | 0.051        | 0.044         | -0.011       | 0.029        | <b>0.258</b> | <b>-0.225</b> | 0.194        | <b>0.558</b>  | -0.166       | 0.058         | -0.164        | <b>-0.408</b> | <b>-0.333</b> |               |               |               |               |              |              |               |              |               |              |              |              |

Table S1 Continued.

| Code | 31            | 32           | 33            | 34           | 35           | 36            | 37           | 38            | 39           | 40            | 41            | 42           | 43            | 45           | 46           | 47           | 48           | 49           | 50            | 51           | 52            | 53           | 54           | 55           | 56            | 57           | 58           | 59            | 60            |
|------|---------------|--------------|---------------|--------------|--------------|---------------|--------------|---------------|--------------|---------------|---------------|--------------|---------------|--------------|--------------|--------------|--------------|--------------|---------------|--------------|---------------|--------------|--------------|--------------|---------------|--------------|--------------|---------------|---------------|
| 45   | 0.114         | 0.133        | <b>0.227</b>  | 0.198        | <b>0.390</b> | 0.015         | -0.051       | -0.105        | -0.090       | 0.066         | -0.105        | 0.098        | 0.111         | 1            | 0.179        | 0.114        | 0.015        | <b>0.212</b> | 0.032         | -0.073       | 0.160         | -0.076       | <b>0.216</b> | -0.035       | -0.040        | <b>0.256</b> | <b>0.216</b> | -0.078        | <b>0.287</b>  |
| 46   | 0.081         | 0.146        | -0.124        | <b>0.264</b> | -0.019       | 0.097         | 0.030        | 0.105         | 0.170        | 0.061         | 0.114         | -0.041       | 0.040         | 0.179        | 1            | 0.193        | -0.048       | <b>0.289</b> | -0.003        | -0.117       | -0.187        | 0.012        | <b>0.249</b> | <b>0.285</b> | 0.083         | 0.182        | <b>0.261</b> | 0.170         | -0.085        |
| 47   | 0.166         | <b>0.454</b> | -0.065        | <b>0.727</b> | -0.135       | <b>0.328</b>  | 0.064        | 0.102         | <b>0.588</b> | 0.045         | 0.000         | -0.099       | -0.075        | 0.114        | 0.193        | 1            | 0.027        | <b>0.672</b> | 0.060         | 0.158        | -0.076        | -0.126       | <b>0.243</b> | <b>0.612</b> | 0.031         | -0.111       | <b>0.376</b> | <b>0.205</b>  | -0.044        |
| 48   | <b>0.290</b>  | <b>0.296</b> | <b>0.326</b>  | 0.159        | <b>0.299</b> | 0.047         | 0.038        | 0.048         | 0.088        | 0.145         | -0.024        | <b>0.494</b> | <b>0.351</b>  | 0.015        | -0.048       | 0.027        | 1            | 0.111        | <b>0.256</b>  | -0.016       | 0.156         | 0.132        | <b>0.251</b> | 0.123        | 0.067         | <b>0.271</b> | 0.115        | 0.147         | <b>0.287</b>  |
| 49   | <b>0.335</b>  | <b>0.461</b> | 0.018         | <b>0.868</b> | -0.066       | 0.069         | <b>0.313</b> | <b>0.233</b>  | <b>0.673</b> | 0.203         | 0.122         | 0.013        | 0.045         | <b>0.212</b> | <b>0.289</b> | <b>0.672</b> | 0.111        | 1            | 0.032         | <b>0.242</b> | -0.061        | -0.030       | <b>0.358</b> | <b>0.617</b> | 0.087         | 0.002        | <b>0.511</b> | <b>0.256</b>  | 0.051         |
| 50   | 0.089         | 0.047        | <b>0.352</b>  | 0.120        | <b>0.346</b> | 0.053         | 0.010        | -0.053        | 0.073        | <b>0.303</b>  | <b>-0.244</b> | <b>0.410</b> | <b>0.372</b>  | 0.032        | -0.003       | 0.060        | <b>0.256</b> | 0.032        | 1             | 0.128        | <b>0.469</b>  | 0.072        | -0.101       | <b>0.292</b> | <b>-0.251</b> | <b>0.275</b> | 0.190        | <b>-0.220</b> | <b>0.571</b>  |
| 51   | <b>0.294</b>  | <b>0.257</b> | 0.011         | <b>0.226</b> | 0.094        | 0.069         | 0.153        | 0.143         | <b>0.238</b> | 0.124         | 0.035         | 0.057        | -0.005        | -0.073       | -0.117       | 0.158        | -0.016       | <b>0.242</b> | 0.128         | 1            | 0.142         | -0.153       | 0.190        | <b>0.246</b> | -0.171        | -0.034       | <b>0.237</b> | 0.173         | 0.037         |
| 52   | 0.107         | 0.154        | <b>0.499</b>  | -0.062       | <b>0.271</b> | -0.140        | -0.051       | -0.182        | -0.091       | 0.025         | <b>-0.255</b> | <b>0.388</b> | 0.186         | 0.160        | -0.187       | -0.076       | 0.156        | -0.061       | <b>0.469</b>  | 0.142        | 1             | -0.088       | 0.107        | 0.005        | <b>-0.248</b> | -0.003       | 0.043        | -0.164        | <b>0.370</b>  |
| 53   | 0.126         | -0.042       | -0.049        | -0.104       | <b>0.247</b> | <b>-0.222</b> | -0.052       | -0.103        | -0.078       | 0.005         | -0.054        | -0.037       | 0.183         | -0.076       | 0.012        | -0.126       | 0.132        | -0.030       | 0.072         | -0.153       | -0.088        | 1            | 0.042        | -0.119       | -0.009        | <b>0.353</b> | -0.045       | -0.072        | 0.037         |
| 54   | <b>0.323</b>  | <b>0.677</b> | -0.077        | <b>0.322</b> | <b>0.260</b> | -0.004        | <b>0.288</b> | <b>0.217</b>  | -0.004       | 0.167         | <b>0.244</b>  | <b>0.277</b> | <b>0.257</b>  | <b>0.216</b> | <b>0.249</b> | <b>0.243</b> | <b>0.251</b> | <b>0.358</b> | -0.101        | 0.190        | 0.107         | 0.042        | 1            | 0.118        | 0.143         | <b>0.324</b> | <b>0.268</b> | <b>0.368</b>  | -0.084        |
| 55   | <b>0.239</b>  | <b>0.377</b> | 0.081         | <b>0.635</b> | 0.051        | <b>0.344</b>  | 0.036        | 0.167         | <b>0.817</b> | 0.124         | 0.027         | 0.021        | -0.021        | -0.035       | <b>0.285</b> | <b>0.612</b> | 0.123        | <b>0.617</b> | <b>0.292</b>  | <b>0.246</b> | 0.005         | -0.119       | 0.118        | 1            | 0.006         | 0.013        | <b>0.640</b> | 0.142         | <b>0.216</b>  |
| 56   | 0.067         | -0.025       | <b>-0.244</b> | 0.152        | -0.036       | -0.110        | 0.151        | 0.123         | 0.084        | 0.146         | <b>0.304</b>  | -0.052       | 0.002         | -0.040       | 0.083        | 0.031        | 0.067        | 0.087        | <b>-0.251</b> | -0.171       | <b>-0.248</b> | -0.009       | 0.143        | 0.006        | 1             | 0.036        | -0.116       | <b>0.376</b>  | <b>-0.235</b> |
| 57   | 0.127         | 0.079        | 0.097         | 0.071        | <b>0.657</b> | -0.117        | -0.045       | 0.051         | -0.163       | <b>0.322</b>  | -0.012        | <b>0.369</b> | <b>0.590</b>  | <b>0.256</b> | 0.182        | -0.111       | <b>0.271</b> | 0.002        | <b>0.275</b>  | -0.034       | -0.003        | <b>0.353</b> | <b>0.324</b> | 0.013        | 0.036         | 1            | 0.169        | 0.187         | <b>0.373</b>  |
| 58   | <b>0.238</b>  | <b>0.405</b> | 0.142         | <b>0.454</b> | <b>0.262</b> | 0.159         | -0.061       | 0.016         | <b>0.339</b> | 0.159         | -0.006        | 0.058        | 0.121         | <b>0.216</b> | <b>0.261</b> | <b>0.376</b> | 0.115        | <b>0.511</b> | 0.190         | <b>0.237</b> | 0.043         | -0.045       | <b>0.268</b> | <b>0.640</b> | -0.116        | 0.169        | 1            | 0.042         | <b>0.225</b>  |
| 59   | <b>0.255</b>  | <b>0.235</b> | -0.149        | <b>0.333</b> | 0.007        | 0.016         | <b>0.401</b> | <b>0.460</b>  | 0.190        | <b>0.315</b>  | <b>0.449</b>  | -0.034       | 0.062         | -0.078       | 0.170        | <b>0.205</b> | 0.147        | <b>0.256</b> | <b>-0.220</b> | 0.173        | -0.164        | -0.072       | <b>0.368</b> | 0.142        | <b>0.376</b>  | 0.187        | 0.042        | 1             | -0.151        |
| 60   | 0.138         | -0.072       | <b>0.814</b>  | 0.115        | <b>0.463</b> | -0.144        | -0.005       | -0.128        | 0.103        | <b>0.369</b>  | <b>-0.354</b> | <b>0.532</b> | <b>0.529</b>  | <b>0.287</b> | -0.085       | -0.044       | <b>0.287</b> | 0.051        | <b>0.571</b>  | 0.037        | <b>0.370</b>  | 0.037        | -0.084       | <b>0.216</b> | <b>-0.235</b> | <b>0.373</b> | <b>0.225</b> | -0.151        | 1             |
| 61   | <b>0.419</b>  | 0.086        | <b>0.710</b>  | 0.142        | <b>0.252</b> | <b>-0.243</b> | -0.043       | <b>-0.257</b> | -0.105       | 0.107         | <b>-0.286</b> | <b>0.395</b> | <b>0.301</b>  | <b>0.325</b> | -0.026       | -0.050       | <b>0.330</b> | 0.135        | 0.183         | 0.052        | <b>0.465</b>  | 0.001        | 0.153        | 0.010        | -0.161        | 0.158        | <b>0.276</b> | -0.096        | <b>0.525</b>  |
| 62   | <b>0.215</b>  | 0.186        | 0.177         | 0.007        | <b>0.895</b> | -0.097        | -0.111       | -0.033        | -0.182       | <b>0.258</b>  | -0.023        | <b>0.287</b> | <b>0.394</b>  | <b>0.362</b> | -0.010       | -0.097       | <b>0.296</b> | -0.069       | <b>0.260</b>  | 0.132        | <b>0.219</b>  | <b>0.326</b> | <b>0.266</b> | 0.047        | -0.014        | <b>0.690</b> | <b>0.315</b> | 0.107         | <b>0.382</b>  |
| 63   | 0.050         | -0.080       | <b>0.350</b>  | 0.178        | <b>0.226</b> | -0.073        | -0.013       | -0.039        | 0.141        | <b>0.377</b>  | <b>-0.320</b> | <b>0.290</b> | <b>0.352</b>  | -0.019       | -0.010       | 0.033        | 0.073        | 0.100        | <b>0.616</b>  | 0.191        | 0.190         | 0.024        | -0.138       | <b>0.214</b> | <b>-0.262</b> | <b>0.412</b> | <b>0.211</b> | -0.068        | <b>0.589</b>  |
| 64   | 0.176         | <b>0.502</b> | -0.085        | <b>0.736</b> | -0.024       | <b>0.278</b>  | 0.196        | <b>0.244</b>  | <b>0.660</b> | 0.157         | 0.128         | -0.044       | -0.045        | 0.178        | <b>0.409</b> | <b>0.700</b> | 0.037        | <b>0.790</b> | 0.131         | <b>0.266</b> | -0.134        | -0.152       | <b>0.315</b> | <b>0.807</b> | 0.043         | 0.012        | <b>0.627</b> | <b>0.216</b>  | 0.009         |
| 65   | <b>0.367</b>  | <b>0.529</b> | 0.089         | <b>0.214</b> | <b>0.265</b> | -0.128        | <b>0.328</b> | 0.116         | 0.090        | 0.162         | 0.157         | <b>0.448</b> | <b>0.407</b>  | 0.107        | 0.163        | <b>0.243</b> | <b>0.326</b> | <b>0.252</b> | -0.026        | 0.121        | <b>0.233</b>  | 0.106        | <b>0.767</b> | 0.091        | 0.086         | <b>0.277</b> | 0.176        | <b>0.312</b>  | 0.054         |
| 66   | 0.010         | -0.037       | 0.069         | -0.008       | 0.039        | 0.000         | -0.034       | 0.161         | <b>0.208</b> | 0.008         | 0.075         | 0.082        | -0.018        | -0.052       | -0.101       | 0.073        | 0.134        | 0.022        | 0.007         | -0.005       | 0.093         | -0.035       | -0.008       | 0.143        | 0.112         | 0.029        | 0.018        | 0.046         | 0.128         |
| 67   | <b>-0.294</b> | -0.037       | -0.190        | -0.007       | -0.064       | <b>0.411</b>  | -0.095       | -0.013        | -0.027       | <b>-0.206</b> | -0.103        | -0.150       | <b>-0.221</b> | -0.133       | 0.030        | 0.103        | -0.096       | -0.062       | <b>0.234</b>  | -0.039       | 0.070         | -0.055       | -0.056       | 0.137        | -0.042        | -0.179       | -0.058       | -0.105        | -0.134        |
| 68   | 0.103         | -0.042       | 0.203         | 0.089        | 0.082        | 0.064         | -0.038       | -0.035        | <b>0.214</b> | 0.026         | 0.061         | 0.166        | 0.096         | 0.014        | -0.179       | 0.064        | <b>0.277</b> | 0.021        | -0.051        | -0.084       | 0.063         | -0.054       | 0.028        | 0.141        | <b>0.358</b>  | -0.028       | -0.030       | 0.062         | <b>0.214</b>  |
| 69   | 0.143         | 0.203        | <b>0.233</b>  | <b>0.541</b> | 0.061        | <b>0.229</b>  | 0.063        | 0.023         | <b>0.777</b> | 0.061         | -0.093        | 0.108        | 0.124         | 0.120        | 0.135        | <b>0.477</b> | 0.202        | <b>0.597</b> | 0.142         | 0.117        | 0.019         | -0.070       | -0.013       | <b>0.680</b> | -0.008        | 0.094        | <b>0.417</b> | 0.144         | <b>0.336</b>  |
| 70   | 0.139         | 0.005        | 0.094         | <b>0.213</b> | <b>0.299</b> | 0.009         | -0.031       | -0.067        | 0.005        | 0.050         | -0.163        | 0.036        | 0.143         | <b>0.628</b> | 0.001        | 0.118        | -0.069       | <b>0.215</b> | <b>0.239</b>  | -0.057       | 0.044         | 0.120        | 0.044        | 0.067        | -0.090        | <b>0.265</b> | 0.098        | -0.095        | <b>0.309</b>  |
| 71   | 0.043         | 0.026        | <b>0.262</b>  | <b>0.209</b> | -0.024       | 0.148         | -0.142       | 0.035         | <b>0.247</b> | 0.041         | -0.191        | 0.052        | 0.022         | -0.048       | -0.084       | 0.177        | 0.138        | 0.193        | 0.171         | 0.138        | 0.150         | -0.183       | 0.017        | <b>0.307</b> | -0.112        | 0.194        | <b>0.357</b> | 0.095         | <b>0.270</b>  |
| 72   | 0.134         | -0.003       | <b>0.304</b>  | 0.047        | <b>0.455</b> | -0.111        | -0.011       | -0.181        | 0.072        | 0.187         | -0.194        | 0.195        | <b>0.321</b>  | 0.070        | 0.025        | -0.017       | <b>0.216</b> | 0.043        | <b>0.324</b>  | 0.102        | 0.102         | <b>0.457</b> | 0.005        | 0.177        | -0.161        | <b>0.565</b> | <b>0.242</b> | 0.022         | <b>0.520</b>  |
| 73   | 0.148         | 0.100        | -0.127        | <b>0.243</b> | -0.080       | 0.089         | 0.150        | <b>0.355</b>  | <b>0.352</b> | 0.192         | <b>0.280</b>  | -0.131       | <b>-0.241</b> | 0.002        | 0.089        | <b>0.268</b> | 0.017        | <b>0.269</b> | -0.055        | <b>0.209</b> | -0.095        | -0.116       | 0.098        | <b>0.305</b> | 0.121         | -0.014       | 0.191        | <b>0.220</b>  | -0.088        |
| 74   | -0.040        | -0.024       | <b>0.221</b>  | 0.041        | <b>0.308</b> | -0.001        | -0.106       | -0.113        | -0.056       | 0.182         | <b>-0.225</b> | <b>0.237</b> | <b>0.271</b>  | <b>0.266</b> | -0.065       | -0.114       | 0.019        | -0.009       | <b>0.241</b>  | -0.045       | 0.142         | -0.046       | -0.063       | -0.026       | -0.111        | <b>0.320</b> | 0.076        | -0.039        | <b>0.375</b>  |
| 75   | <b>0.316</b>  | 0.152        | <b>0.339</b>  | 0.198        | <b>0.505</b> | -0.160        | -0.097       | <b>-0.246</b> | -0.194       | 0.134         | <b>-0.248</b> | <b>0.260</b> | <b>0.381</b>  | <b>0.449</b> | 0.052        | 0.033        | 0.199        | 0.160        | <b>0.221</b>  | 0.059        | <b>0.272</b>  | 0.178        | <b>0.296</b> | 0.004        | -0.055        | <b>0.442</b> | <b>0.377</b> | -0.089        | <b>0.424</b>  |
| 76   | 0.122         | -0.112       | <b>0.732</b>  | 0.068        | <b>0.338</b> | -0.108        | -0.117       | <b>-0.270</b> | 0.026        | <b>0.255</b>  | <b>-0.450</b> | <b>0.339</b> | <b>0.357</b>  | 0.154        | -0.040       | -0.067       | <b>0.288</b> | -0.012       | <b>0.597</b>  | 0.105        | <b>0.383</b>  | 0.173        | -0.135       | 0.156        | <b>-0.305</b> | <b>0.345</b> | 0.202        | -0.178        | <b>0.829</b>  |
| 77   | -0.086        | -0.135       | <b>0.393</b>  | -0.138       | 0.056        | -0.036        | -0.065       | -0.146        | -0.067       | 0.190         | -0.047        | 0.177        | 0.129         | 0.057        | -0.118       | -0.121       | -0.027       | -0.138       | 0.036         | -0.119       | 0.155         | 0.023        | -0.117       | -0.062       | -0.019        | 0.048        | -0.087       | -0.084        | <b>0.225</b>  |
| 78   | <b>0.218</b>  | 0.127        | <b>0.519</b>  | -0.090       | <b>0.340</b> | -0.113        | -0.071       | -0.149        | -0.038       | 0.054         | <b>-0.248</b> | <b>0.618</b> | <b>0.355</b>  | 0.106        | -0.065       | -0.084       | <b>0.477</b> | -0.145       | <b>0.345</b>  | -0.011       | <b>0.419</b>  | 0.005        | 0.056        | 0.046        | <b>-0.227</b> | 0.175        | 0.115        | -0.149        | <b>0.539</b>  |
| 79   | 0.082         | -0.096       | <b>0.479</b>  | 0.147        | <b>0.243</b> | -0.027        | -0.086       | <b>-0.210</b> | 0.090        | <b>0.284</b>  | <b>-0.422</b> | <b>0.227</b> | <b>0.230</b>  | 0.139        | -0.064       | 0.044        | 0.052        | 0.079        | <b>0.525</b>  | 0.204        | <b>0.243</b>  | 0.001        | -0.161       | 0.197        | <b>-0.271</b> | <b>0.324</b> | <b>0.308</b> | -0.138        | <b>0.661</b>  |
| 80   | <b>0.360</b>  | <b>0.305</b> | <b>0.450</b>  | <b>0.400</b> | 0.104        | 0.145         | 0.090        | <b>-0.237</b> | <b>0.257</b> | -0.017        | <b>-0.283</b> | <b>0.265</b> | 0.152         | <b>0.231</b> | 0.095        | <b>0.</b>    |              |              |               |              |               |              |              |              |               |              |              |               |               |

Table S1 Continued.

| Code | 61           | 62           | 63           | 64           | 65           | 66           | 67           | 68           | 69           | 70           | 71           | 72           | 73           | 74           | 75           | 76           | 77           | 78           | 79           | 80           | 81           | 82           | 83           | 84           | 85           | 86           | 87           |
|------|--------------|--------------|--------------|--------------|--------------|--------------|--------------|--------------|--------------|--------------|--------------|--------------|--------------|--------------|--------------|--------------|--------------|--------------|--------------|--------------|--------------|--------------|--------------|--------------|--------------|--------------|--------------|
| 45   | <b>0,325</b> | <b>0,362</b> | -0,019       | 0,178        | 0,107        | -0,052       | -0,133       | 0,014        | 0,120        | <b>0,628</b> | -0,048       | 0,070        | 0,002        | <b>0,266</b> | <b>0,449</b> | 0,154        | 0,057        | 0,106        | 0,139        | <b>0,231</b> | 0,109        | 0,081        | <b>0,423</b> | <b>0,250</b> | 0,149        | -0,032       | 0,114        |
| 46   | -0,026       | -0,010       | -0,010       | <b>0,409</b> | 0,163        | -0,101       | 0,030        | -0,179       | 0,135        | 0,001        | -0,084       | 0,025        | 0,089        | -0,065       | 0,052        | -0,040       | -0,118       | -0,065       | -0,064       | 0,095        | -0,035       | 0,146        | -0,059       | 0,081        | -0,003       | -0,049       | 0,004        |
| 47   | -0,050       | -0,097       | 0,033        | <b>0,700</b> | <b>0,243</b> | 0,073        | 0,103        | 0,064        | <b>0,477</b> | 0,118        | 0,177        | -0,017       | <b>0,268</b> | -0,114       | 0,033        | -0,067       | -0,121       | -0,084       | 0,044        | <b>0,324</b> | -0,113       | 0,047        | -0,052       | 0,203        | -0,071       | 0,016        | 0,120        |
| 48   | <b>0,330</b> | <b>0,296</b> | 0,073        | 0,037        | <b>0,326</b> | 0,134        | -0,096       | <b>0,277</b> | 0,202        | -0,069       | 0,138        | <b>0,216</b> | 0,017        | 0,019        | 0,199        | <b>0,288</b> | -0,027       | <b>0,477</b> | 0,052        | <b>0,367</b> | <b>0,254</b> | 0,025        | <b>0,219</b> | <b>0,332</b> | 0,184        | -0,095       | <b>0,404</b> |
| 49   | 0,135        | -0,069       | 0,100        | <b>0,790</b> | <b>0,252</b> | 0,022        | -0,062       | 0,021        | <b>0,597</b> | <b>0,215</b> | 0,193        | 0,043        | <b>0,269</b> | -0,009       | 0,160        | -0,012       | -0,138       | -0,145       | 0,079        | <b>0,307</b> | -0,033       | 0,173        | 0,028        | 0,102        | -0,024       | -0,088       | 0,084        |
| 50   | 0,183        | <b>0,260</b> | <b>0,616</b> | 0,131        | -0,026       | 0,007        | <b>0,234</b> | -0,051       | 0,142        | <b>0,239</b> | 0,171        | <b>0,324</b> | -0,055       | <b>0,241</b> | <b>0,221</b> | <b>0,597</b> | 0,036        | <b>0,345</b> | <b>0,525</b> | 0,156        | 0,145        | 0,147        | <b>0,488</b> | 0,107        | <b>0,658</b> | 0,142        | <b>0,274</b> |
| 51   | 0,052        | 0,132        | 0,191        | <b>0,266</b> | 0,121        | -0,005       | -0,039       | -0,084       | 0,117        | -0,057       | 0,138        | 0,102        | <b>0,209</b> | -0,045       | 0,059        | 0,105        | -0,119       | -0,011       | 0,204        | 0,202        | -0,071       | 0,115        | 0,024        | -0,005       | 0,105        | <b>0,269</b> | -0,034       |
| 52   | <b>0,465</b> | <b>0,219</b> | 0,190        | -0,134       | <b>0,233</b> | 0,093        | 0,070        | 0,063        | 0,019        | 0,044        | 0,150        | 0,102        | -0,095       | 0,142        | <b>0,272</b> | <b>0,383</b> | 0,155        | <b>0,419</b> | <b>0,243</b> | 0,190        | <b>0,267</b> | <b>0,247</b> | <b>0,296</b> | 0,204        | <b>0,244</b> | 0,166        | <b>0,274</b> |
| 53   | 0,001        | <b>0,326</b> | 0,024        | -0,152       | 0,106        | -0,035       | -0,055       | -0,054       | -0,070       | 0,120        | -0,183       | <b>0,457</b> | -0,116       | -0,046       | 0,178        | 0,173        | 0,023        | 0,005        | 0,001        | -0,045       | 0,199        | 0,147        | <b>0,372</b> | 0,119        | <b>0,265</b> | -0,023       | -0,038       |
| 54   | 0,153        | <b>0,266</b> | -0,138       | <b>0,315</b> | <b>0,767</b> | -0,008       | -0,056       | 0,028        | -0,013       | 0,044        | 0,017        | 0,005        | 0,098        | -0,063       | <b>0,296</b> | -0,135       | -0,117       | 0,056        | -0,161       | <b>0,230</b> | -0,154       | 0,172        | 0,019        | <b>0,565</b> | -0,125       | -0,030       | 0,151        |
| 55   | 0,010        | 0,047        | <b>0,214</b> | <b>0,807</b> | 0,091        | 0,143        | 0,137        | 0,141        | <b>0,680</b> | 0,067        | <b>0,307</b> | 0,177        | <b>0,305</b> | -0,026       | 0,004        | 0,156        | -0,062       | 0,046        | 0,197        | <b>0,313</b> | -0,028       | 0,033        | 0,050        | 0,135        | 0,147        | <b>0,273</b> | <b>0,217</b> |
| 56   | -0,161       | -0,014       | -0,262       | 0,043        | 0,086        | 0,112        | -0,042       | <b>0,358</b> | -0,008       | -0,090       | -0,112       | -0,161       | 0,121        | -0,111       | -0,055       | -0,305       | -0,019       | -0,227       | -0,271       | -0,142       | -0,115       | -0,165       | -0,214       | 0,019        | -0,261       | -0,093       | -0,041       |
| 57   | 0,158        | <b>0,690</b> | <b>0,412</b> | 0,012        | <b>0,277</b> | 0,029        | -0,179       | -0,028       | 0,094        | <b>0,265</b> | 0,194        | <b>0,565</b> | -0,014       | <b>0,320</b> | <b>0,442</b> | <b>0,345</b> | 0,048        | 0,175        | <b>0,324</b> | 0,076        | 0,085        | 0,165        | <b>0,560</b> | <b>0,404</b> | <b>0,475</b> | -0,046       | 0,200        |
| 58   | <b>0,276</b> | <b>0,315</b> | <b>0,211</b> | <b>0,627</b> | 0,176        | 0,018        | -0,058       | -0,030       | <b>0,417</b> | 0,098        | <b>0,357</b> | <b>0,242</b> | 0,191        | 0,076        | <b>0,377</b> | 0,202        | -0,087       | 0,115        | <b>0,308</b> | <b>0,376</b> | 0,025        | <b>0,325</b> | 0,183        | <b>0,235</b> | 0,181        | 0,153        | <b>0,270</b> |
| 59   | -0,096       | 0,107        | -0,068       | <b>0,216</b> | <b>0,312</b> | 0,046        | -0,105       | 0,062        | 0,144        | -0,095       | 0,095        | 0,022        | <b>0,220</b> | -0,039       | -0,089       | -0,178       | -0,084       | -0,149       | -0,138       | 0,106        | -0,144       | -0,070       | -0,148       | 0,097        | -0,169       | -0,056       | -0,050       |
| 60   | <b>0,525</b> | <b>0,382</b> | <b>0,589</b> | 0,009        | 0,054        | 0,128        | -0,134       | <b>0,214</b> | <b>0,336</b> | <b>0,309</b> | <b>0,270</b> | <b>0,520</b> | -0,088       | <b>0,375</b> | <b>0,424</b> | <b>0,829</b> | <b>0,225</b> | <b>0,539</b> | <b>0,661</b> | <b>0,409</b> | <b>0,485</b> | 0,099        | <b>0,678</b> | <b>0,266</b> | <b>0,802</b> | <b>0,239</b> | <b>0,405</b> |
| 61   | 1            | <b>0,303</b> | 0,198        | -0,022       | <b>0,227</b> | -0,018       | -0,205       | 0,096        | 0,088        | 0,124        | <b>0,205</b> | <b>0,285</b> | -0,177       | <b>0,234</b> | <b>0,765</b> | <b>0,597</b> | 0,109        | <b>0,470</b> | <b>0,331</b> | <b>0,486</b> | <b>0,475</b> | <b>0,393</b> | <b>0,411</b> | <b>0,232</b> | <b>0,366</b> | -0,019       | <b>0,402</b> |
| 62   | <b>0,303</b> | 1            | <b>0,263</b> | -0,030       | <b>0,217</b> | 0,038        | -0,054       | 0,016        | 0,024        | <b>0,276</b> | 0,122        | <b>0,566</b> | 0,021        | <b>0,448</b> | <b>0,565</b> | <b>0,400</b> | 0,026        | <b>0,277</b> | <b>0,334</b> | 0,179        | 0,175        | 0,202        | <b>0,554</b> | <b>0,448</b> | <b>0,472</b> | 0,179        | 0,203        |
| 63   | 0,198        | <b>0,263</b> | 1            | 0,089        | -0,045       | 0,064        | -0,125       | -0,131       | <b>0,232</b> | 0,180        | <b>0,538</b> | <b>0,413</b> | 0,123        | <b>0,447</b> | <b>0,257</b> | <b>0,687</b> | 0,113        | 0,150        | <b>0,872</b> | 0,155        | <b>0,232</b> | <b>0,306</b> | <b>0,556</b> | 0,028        | <b>0,794</b> | 0,077        | <b>0,246</b> |
| 64   | -0,022       | -0,030       | 0,089        | 1            | 0,154        | -0,038       | 0,108        | -0,114       | <b>0,518</b> | 0,182        | 0,141        | 0,063        | <b>0,282</b> | -0,002       | 0,075        | -0,039       | -0,116       | -0,112       | 0,062        | <b>0,273</b> | -0,203       | 0,045        | -0,020       | 0,128        | -0,025       | 0,037        | 0,039        |
| 65   | <b>0,227</b> | <b>0,217</b> | -0,045       | 0,154        | 1            | 0,083        | -0,144       | 0,141        | 0,130        | -0,038       | 0,064        | 0,131        | 0,015        | -0,069       | <b>0,230</b> | -0,031       | -0,103       | <b>0,228</b> | -0,074       | <b>0,340</b> | 0,032        | 0,176        | 0,059        | <b>0,531</b> | -0,035       | 0,023        | <b>0,261</b> |
| 66   | -0,018       | 0,038        | 0,064        | -0,038       | 0,083        | 1            | -0,043       | <b>0,486</b> | <b>0,237</b> | -0,049       | <b>0,395</b> | 0,043        | <b>0,423</b> | 0,112        | -0,036       | 0,059        | -0,037       | 0,062        | 0,021        | -0,060       | 0,074        | -0,062       | -0,037       | 0,111        | 0,021        | 0,038        | <b>0,460</b> |
| 67   | -0,205       | -0,054       | -0,125       | 0,108        | -0,144       | -0,043       | 1            | -0,082       | -0,107       | -0,032       | -0,074       | -0,131       | -0,134       | -0,056       | -0,113       | -0,109       | -0,132       | -0,053       | -0,094       | -0,109       | -0,172       | -0,018       | -0,076       | 0,082        | -0,079       | 0,073        | -0,026       |
| 68   | 0,096        | 0,016        | -0,131       | -0,114       | 0,141        | <b>0,486</b> | -0,082       | 1            | <b>0,288</b> | -0,094       | 0,202        | -0,008       | 0,119        | -0,043       | 0,024        | 0,049        | 0,090        | 0,093        | -0,010       | 0,127        | <b>0,250</b> | -0,154       | 0,027        | 0,176        | -0,013       | -0,013       | <b>0,352</b> |
| 69   | 0,088        | 0,024        | <b>0,232</b> | <b>0,518</b> | 0,130        | <b>0,237</b> | -0,107       | <b>0,288</b> | 1            | 0,060        | <b>0,376</b> | <b>0,239</b> | <b>0,265</b> | 0,125        | 0,044        | <b>0,210</b> | -0,003       | 0,118        | <b>0,217</b> | <b>0,433</b> | 0,154        | -0,084       | 0,141        | 0,127        | 0,172        | 0,083        | <b>0,313</b> |
| 70   | 0,124        | <b>0,276</b> | 0,180        | 0,182        | -0,038       | -0,049       | -0,032       | -0,094       | 0,060        | 1            | -0,061       | 0,165        | -0,065       | 0,140        | <b>0,296</b> | <b>0,210</b> | 0,030        | 0,061        | 0,203        | 0,053        | 0,051        | 0,139        | <b>0,418</b> | 0,149        | <b>0,289</b> | -0,015       | 0,006        |
| 71   | <b>0,205</b> | 0,122        | <b>0,538</b> | 0,141        | 0,064        | <b>0,395</b> | -0,074       | 0,202        | <b>0,376</b> | -0,061       | 1            | 0,204        | <b>0,420</b> | 0,192        | 0,144        | <b>0,272</b> | -0,060       | 0,079        | <b>0,574</b> | <b>0,285</b> | 0,195        | <b>0,296</b> | 0,188        | 0,063        | <b>0,240</b> | -0,064       | <b>0,440</b> |
| 72   | <b>0,285</b> | <b>0,566</b> | <b>0,413</b> | 0,063        | 0,131        | 0,043        | -0,131       | -0,008       | <b>0,239</b> | 0,165        | 0,204        | 1            | 0,009        | 0,188        | <b>0,425</b> | <b>0,585</b> | 0,063        | <b>0,270</b> | <b>0,484</b> | <b>0,298</b> | <b>0,341</b> | <b>0,218</b> | <b>0,625</b> | <b>0,284</b> | <b>0,651</b> | 0,196        | 0,189        |
| 73   | -0,177       | 0,021        | 0,123        | <b>0,282</b> | 0,015        | <b>0,423</b> | -0,134       | 0,119        | <b>0,265</b> | -0,065       | <b>0,420</b> | 0,009        | 1            | -0,013       | -0,165       | -0,043       | -0,092       | -0,178       | 0,142        | 0,119        | -0,001       | 0,113        | -0,080       | -0,149       | -0,064       | -0,066       | 0,187        |
| 74   | <b>0,234</b> | <b>0,248</b> | <b>0,447</b> | -0,002       | -0,069       | 0,112        | -0,056       | -0,043       | 0,125        | 0,140        | 0,192        | 0,188        | -0,013       | 1            | <b>0,293</b> | <b>0,376</b> | -0,009       | 0,067        | <b>0,441</b> | -0,009       | 0,089        | -0,057       | <b>0,462</b> | 0,179        | <b>0,397</b> | -0,026       | 0,064        |
| 75   | <b>0,765</b> | <b>0,565</b> | <b>0,257</b> | 0,075        | <b>0,230</b> | -0,036       | -0,113       | 0,024        | 0,044        | <b>0,296</b> | 0,144        | <b>0,425</b> | -0,165       | <b>0,293</b> | 1            | <b>0,510</b> | -0,003       | <b>0,318</b> | <b>0,357</b> | <b>0,374</b> | <b>0,253</b> | <b>0,395</b> | <b>0,569</b> | <b>0,479</b> | <b>0,466</b> | 0,036        | <b>0,313</b> |
| 76   | <b>0,597</b> | <b>0,400</b> | <b>0,687</b> | -0,039       | -0,031       | 0,059        | -0,109       | 0,049        | <b>0,210</b> | <b>0,210</b> | <b>0,272</b> | <b>0,585</b> | -0,043       | <b>0,376</b> | <b>0,510</b> | 1            | 0,200        | <b>0,457</b> | <b>0,738</b> | <b>0,422</b> | <b>0,546</b> | <b>0,333</b> | <b>0,710</b> | 0,180        | <b>0,890</b> | 0,134        | <b>0,413</b> |
| 77   | 0,109        | 0,026        | 0,113        | -0,116       | -0,103       | -0,037       | -0,132       | 0,090        | -0,003       | 0,030        | -0,060       | 0,063        | -0,092       | -0,009       | -0,003       | 0,200        | 1            | 0,088        | 0,181        | 0,033        | <b>0,239</b> | -0,100       | 0,133        | -0,071       | 0,114        | 0,026        | -0,016       |
| 78   | <b>0,470</b> | <b>0,277</b> | 0,150        | -0,112       | <b>0,228</b> | 0,062        | -0,053       | 0,093        | 0,118        | 0,061        | 0,079        | <b>0,270</b> | -0,178       | 0,067        | <b>0,318</b> | <b>0,457</b> | 0,088        | 1            | 0,200        | <b>0,476</b> | <b>0,260</b> | 0,137        | <b>0,318</b> | <b>0,367</b> | <b>0,375</b> | <b>0,233</b> | <b>0,531</b> |
| 79   | <b>0,331</b> | <b>0,334</b> | <b>0,872</b> | 0,062        | -0,074       | 0,021        | -0,094       | -0,010       | <b>0,217</b> | 0,203        | <b>0,574</b> | <b>0,484</b> | 0,142        | <b>0,441</b> | <b>0,357</b> | <b>0,738</b> | 0,181        | 0,200        | 1            | <b>0,322</b> | <b>0,364</b> | <b>0,366</b> | <b>0,677</b> | 0,049        | <b>0,804</b> | 0,095        | <b>0,235</b> |
| 80   | <b>0,486</b> | 0,179        | 0,155        | <b>0,273</b> | <b>0,340</b> | -0,060       | -0,109       | 0,127        | <b>0,433</b> | 0,053        | <b>0,285</b> | <b>0,298</b> | 0,119        | -0,009       | <b>0,374</b> | <b>0,422</b> | 0,033        | <b>0,476</b> | <b>0,322</b> | 1            | <b>0,279</b> | <b>0,362</b> | <b>0,289</b> | <b>0,359</b> | <b>0,276</b> | 0,101        | <b>0,549</b> |
| 81   | <b>0,475</b> | 0,175        | <b>0,232</b> | -0,203       | 0,032        | 0,074        | -0,172       | <b>0,250</b> | 0,154        | 0,051        | 0,195        | <b>0,341</b> | -0,001       | 0,089        | <b>0,253</b> | <b>0,546</b> | <b>0,239</b> | <b>0,260</b> | <b>0,364</b> | <b>0,279</b> | 1            | 0,184        | <b>0,297</b> | -0,051       | <b>0,361</b> | -0,033       | 0,194        |
| 82   | <b>0,393</b> | 0,202        | <b>0,306</b> | 0,045        | 0,176        | -0,062       | -0,018       | -0,154       | -0,084       | 0,139        | <b>0,296</b> | <b>0,218</b> | 0,113        | -0,057       | <b>0,395</b> | <b>0,333</b> | -0,100       | 0,137        | <b>0,366</b> | <b>0,362</b> | 0,184        | 1            | <b>0,290</b> | 0,057        | <b>0,276</b> | -0,078       | <b>0,420</b> |
| 83   | <b>0,411</b> | <b>0,554</b> | <b>0,556</b> | -0,020       | 0,059</      |              |              |              |              |              |              |              |              |              |              |              |              |              |              |              |              |              |              |              |              |              |              |

**Supplemental Table S2.** QTLs detected in the ‘232’ × ‘1392’ strawberry population controlling the content of esters based on Kruskal-Wallis (K-W) and interval mapping (IM). The position of the LOD peak (in cM) and the most closely associated marker locus is indicated. Those QTLs identified in two or all three years are indicated in bold.

| Volatile              | QTL               | Year              | LG                | K-W <sup>a</sup> | Thresh. | LOD  | Position                  | Closest marker                 | R <sup>2</sup> (%) <sup>d</sup> | GIC <sup>c</sup> | Transf. |
|-----------------------|-------------------|-------------------|-------------------|------------------|---------|------|---------------------------|--------------------------------|---------------------------------|------------------|---------|
| Ethyl acetate         | <i>02III-6</i>    | 2009 <sup>e</sup> | LGIII-M.6         | ***              | 4.4     | 3.2  | 27.5                      | cca/agt-475 <sup>b</sup>       | 50.6                            | 0.34             | Ln      |
| Butyl acetate         | <i>13VI-1</i>     | 2007              | LGVI-F.1          | ****             | 5.2     | 8.6  | 15.7                      | ChFaM001-230/235 <sup>b</sup>  | 34.6                            | 0.95             | Ln      |
|                       |                   | 2007              | LGVI-M.1          | ****             | 5.3     | 8.6  | 16.5                      | ChFaM001-230/235 <sup>b</sup>  | 34.6                            | 0.95             | Ln      |
|                       |                   | 2008              | LGVI-F.1          | ****             | 4.7     | 11.3 | 21.5                      | ChFvM205-133/114 <sup>b</sup>  | 44.0                            | 1.00             | Ln      |
|                       |                   | 2008              | LGVI-M.1          | ****             | 4.7     | 11.5 | 22.5                      | ChFvM205-133/116 <sup>b</sup>  | 45.5                            | 1.00             | Ln      |
|                       |                   | 2009              | LGVI-F.1          | ****             | 4.5     | 9.1  | 9.0                       | ChFaM001-230/235 (15.7)        | 49.9                            | 0.75             | Ln      |
|                       |                   | 2009              | LGVI-M.1          | ****             | 4.4     | 9.1  | 12.0                      | ChFaM001-230/235 (16.5)        | 46.7                            | 0.80             | Ln      |
| Methyl pentanoate     | <i>14I-1</i>      | 2008              | LGI-F.1           | ****             | 3.9     | 5.6  | 45.5                      | ChFaM149-184/198 <sup>b</sup>  | 25                              | 0.98             | Ln      |
|                       |                   | 2008              | LGI-M.1b          | ****             | 4       | 5.5  | 6.6                       | ChFaM149-184/198 <sup>b</sup>  | 24.7                            | 0.48             | Ln      |
|                       | <i>14I-2</i>      | 2008              | LGI-F.2           | ***              | 3.9     | 5.4  | 23.7                      | F3H-S2 (23.9)                  | 26                              | 0.95             | Ln      |
|                       |                   | 2008              | LGI-M.2           | ***              | 4       | 5.2  | 0.4                       | UFFxa16H7-265/249 <sup>b</sup> | 23.3                            | 1.00             | Ln      |
|                       |                   | 2009 <sup>z</sup> | LGI-F.2           | *                | 4.2     | 3.2  | 7.6                       | ChFaM151-218 <sup>b</sup>      | 23.8                            | 1.00             | Ln      |
|                       | <i>14VI-1</i>     | 2008              | LGVI-F.1          | ****             | 3.9     | 4.9  | 9.0                       | ChFaM001-230/235 (15.7)        | 27.8                            | 0.75             | Ln      |
| 2008                  |                   | LGVI-M.1          | ****              | 4                | 4.9     | 12.0 | ChFaM001-230/235 (16.5)   | 26.6                           | 0.79                            | Ln               |         |
| 3-methylbutyl acetate | <i>19III-2</i>    | 2007              | LGIII-F.2         | ****             | 4.1     | 6.3  | 33.1                      | ChFaM009-556 (30.1)            | 33.6                            | 0.91             | Ln      |
|                       |                   | 2007              | LGIII-M.2         | ****             | 4.1     | 6.7  | 45.2                      | ChFaM214-166 (39.1)            | 35.2                            | 0.84             | Ln      |
|                       |                   | 2008              | LGIII-F.2         | ****             | 4       | 7.2  | 36.1                      | ChFaM129-190 (38.2)            | 41.1                            | 0.93             | Ln      |
|                       |                   | 2008              | LGIII-M.2         | ****             | 4       | 9.2  | 33.5                      | cct/aca-213 (30.5)             | 40.2                            | 0.92             | Ln      |
|                       |                   | 2009              | LGIII-F.2         | ****             | 4       | 6.4  | 29.5                      | ChFaM088-156 <sup>b</sup>      | 32.7                            | 1.00             | Ln      |
|                       |                   | 2009              | LGIII-M.2         | ****             | 4.1     | 6.4  | 27.5                      | cct/aca-213 (30.5)             | 29.8                            | 0.93             | Ln      |
|                       | <i>19III-6</i>    | 2008              | LGIII-F.6         | ****             | 4.1     | 7.0  | 0.0                       | ChFaM159-257 <sup>b</sup>      | 40.4                            | 0.93             | Ln      |
|                       |                   | 2008              | LGIII-M.6         | ****             | 3.9     | 6.2  | 3.0                       | ChFaM159-257 (0.0)             | 47.9                            | 0.30             | Ln      |
|                       | <i>19I-2</i>      | 2009              | LGI-F.2           | **               | 4       | 4.0  | 25.6                      | F3H-S4 <sup>b</sup>            | 18.2                            | 0.99             | Ln      |
| 2-methylbutyl acetate | <i>20III-2</i>    | 2007              | LGIII-M.2         | ****             | 4.1     | 4.9  | 57.1                      | ChFvM140-114 <sup>b</sup>      | 29.1                            | 0.99             | Ln      |
|                       |                   | 2008              | LGIII-M.2         | ****             | 4       | 5.5  | 51.2                      | BFACT045-175 (54.0)            | 36.2                            | 0.90             | Ln      |
|                       | <i>20III-1</i>    | 2008              | LGIII-F.1         | ****             | 4       | 4.7  | 4.2                       | caa/aac-278 <sup>b</sup>       | 23.6                            | 1.00             | Ln      |
|                       |                   | 2008              | LGIII-M.1         | ****             | 4       | 4.5  | 0.0                       | ChFaM112-178 <sup>b</sup>      | 24.3                            | 0.79             | Ln      |
| Methyl hexanoate      | <i>28I-1</i>      | 2008              | LGI-F.1           | ****             | 4       | 4.5  | 45.5                      | ChFaM149-184/198 <sup>b</sup>  | 20.5                            | 0.98             | Ln      |
|                       |                   | 2008              | LGI-M.1b          | ****             | 4.2     | 4.4  | 6.6                       | ChFaM149-184/198 <sup>b</sup>  | 20.1                            | 0.48             | Ln      |
|                       |                   | 2009              | LGI-F.1           | ***              | 4.1     | 5    | 28.0                      | F3H-S3 <sup>b</sup>            | 25.3                            | 1.00             | Ln      |
|                       | <i>28IV-1</i>     | 2007 <sup>c</sup> | LGIV-F.1a         | *                | 3.9     | 3.8  | 84.5                      | ChFaM023-163 <sup>b</sup>      | 41.9                            | 0.98             | SQRT    |
|                       | 2009 <sup>c</sup> | LGIV-F.1a         | ****              | 4.1              | 4.1     | 66.4 | ChFvM232-188 <sup>b</sup> | 26.3                           | 1.00                            | Ln               |         |
| Butyl butanoate       | <i>33VI-1</i>     | 2007 <sup>c</sup> | LGVI-F.1          | ***              | 4.8     | 3.6  | 15.7                      | ChFaM001-230/235 <sup>b</sup>  | 16.2                            | 0.95             | Ln      |
|                       |                   | 2007 <sup>c</sup> | LGVI-M.1          | ***              | 4.9     | 3.6  | 16.5                      | ChFaM001-230/235 <sup>b</sup>  | 16.2                            | 0.95             | Ln      |
|                       |                   | 2008              | LGVI-F.1          | ****             | 5.5     | 5.9  | 21.5                      | ChFvM205-133/114 <sup>b</sup>  | 26.3                            | 1.00             | Ln      |
|                       |                   | 2008              | LGVI-M.1          | ****             | 5.4     | 6    | 22.5                      | ChFvM205-133/116 <sup>b</sup>  | 26.7                            | 1.00             | Ln      |
|                       |                   | 2009              | LGVI-F.1          | ****             | 5       | 6.5  | 6.0                       | cca/agt-900 (0.0)              | 46.1                            | 0.70             | Ln      |
|                       |                   | 2009              | LGVI-M.1          | ****             | 5.1     | 6.5  | 9.0                       | ChFaM001-230/235 (16.5)        | 44.1                            | 0.72             | Ln      |
| Ethyl hexanoate       | <i>35II-3</i>     | 2009              | LGII-M.3          | -                | 4       | 4.2  | 22.8                      | ChFvM201-224 (24.8)            | 38.5                            | 0.87             | Ln      |
| Hexyl acetate         | <i>40VI-1</i>     | 2007              | LGVI-F.1          | *                | 4.2     | 4.2  | 0.0                       | cca/agt-900 <sup>b</sup>       | 35.2                            | 0.64             | Ln      |
|                       |                   | 2007              | LGVI-M.1          | *                | 4.1     | 4.3  | 0.0                       | cca/agt-900 <sup>b</sup>       | 36.3                            | 0.64             | Ln      |
|                       |                   | 2009 <sup>c</sup> | LGVI-M.1          | *                | 4.7     | 3.5  | 20.1                      | Fvi20-164/166 <sup>b</sup>     | 16.0                            | 1.00             | -       |
| Methyl benzoate       | <i>56I-5</i>      | 2007              | LGI-F.1           | **               | 4.1     | 4.2  | 38.4                      | ARSFL092-183 (39.7)            | 23.5                            | 0.80             | Ln      |
|                       |                   | 2007 <sup>c</sup> | LGI-M.1b          | *                | 4.3     | 3.1  | 0.0                       | ARSFL092-183 <sup>b</sup>      | 14.2                            | 0.46             | Ln      |
|                       |                   | 2008              | LGI-F.1           | ****             | 4.2     | 6.3  | 38.4                      | ARSFL092-183 (39.7)            | 31.3                            | 0.80             | Ln      |
|                       |                   | 2008              | LGI-M.1b          | ****             | 4.1     | 5.4  | 6.6                       | ChFaM149-184/198 <sup>b</sup>  | 24.2                            | 0.48             | Ln      |
|                       |                   | 2009              | LGI-F.1           | ****             | 5.3     | 11   | 35.4                      | ARSFL092-183 (39.7)            | 50.5                            | 0.79             | 1/SQR   |
|                       |                   | 2009              | LGI-M.1b          | ****             | 5.4     | 5.9  | 6.6                       | ChFaM149-184/198 <sup>b</sup>  | 25.4                            | 0.48             | 1/SQR   |
| Methyl octanoate      | <i>57IV-1</i>     | 2007              | LGIV-F.1a         | *                | 3.9     | 6.2  | 72.9                      | ChFvM028176c <sup>b</sup>      | 52.4                            | 1.00             | SQRT    |
| Benzyl acetate        | <i>59I-1</i>      | 2007              | LGI-F.1           | ****             | 4.3     | 4.4  | 39.7                      | ARSFL092-183 <sup>b</sup>      | 25.8                            | 0.83             | Ln      |
|                       |                   | 2007              | LGI-M.1b          | ****             | 3.9     | 4.2  | 0.0                       | ARSFL092-183 <sup>b</sup>      | 20.0                            | 0.46             | Ln      |
|                       |                   | 2008              | LGI-F.1           | ****             | 4.2     | 6.8  | 45.5                      | ChFaM149-184/198 <sup>b</sup>  | 29.5                            | 0.98             | Ln      |
|                       |                   | 2008              | LGI-M.1b          | ****             | 4.2     | 6.3  | 6.6                       | ChFaM149-184/198 <sup>b</sup>  | 27.5                            | 0.48             | Ln      |
|                       |                   | 2009              | LGI-F.1           | ****             | 4.2     | 5.1  | 39.7                      | ARSFL092-183 <sup>b</sup>      | 27.7                            | 0.83             | Ln      |
|                       |                   | 2009              | LGI-M.1b          | ****             | 4.3     | 4.9  | 6.6                       | ChFaM149-184/198 <sup>b</sup>  | 21.8                            | 0.48             | Ln      |
|                       | <i>59VII-1</i>    | 2007              | LGVII-F.1c        | ****             | 4.3     | 7.9  | 9.0                       | EMFv021-196 (0.0)              | 51.1                            | 0.71             | Ln      |
|                       |                   | 2008              | LGVII-F.1c        | ****             | 4.2     | 5    | 6.0                       | EMFv021-196 (0.0)              | 32.0                            | 0.78             | Ln      |
|                       |                   | 2009              | LGVII-F.1c        | ****             | 4.2     | 7.4  | 18.0                      | EMFv021-196 (0.0)              | 53.9                            | 0.65             | Ln      |
|                       | Butyl hexanoate   | <i>60VI-1</i>     | 2007 <sup>c</sup> | LGVI-F.1         | ***     | 5.4  | 3.6                       | 15.7                           | ChFaM001-230/235 <sup>b</sup>   | 16.4             | 0.95    |
| 2008                  |                   |                   | LGVI-F.1          | ****             | 4.7     | 5.1  | 21.5                      | ChFvM205-133/114 <sup>b</sup>  | 23.1                            | 1.00             | Ln      |
| 2008                  |                   |                   | LGVI-M.1          | ***              | 4.7     | 5.2  | 22.5                      | ChFvM205-133/116 <sup>b</sup>  | 23.5                            | 1.00             | Ln      |
| 2009                  |                   |                   | LGVI-F.1          | ****             | 5.2     | 7    | 9.0                       | ChFaM001-230/235 (15.7)        | 46.8                            | 0.75             | Ln      |
| 2009                  |                   |                   | LGVI-M.1          | ****             | 5.1     | 7    | 9.0                       | ChFaM001-230/235 (16.5)        | 48.1                            | 0.72             | Ln      |
| <i>60V-2</i>          |                   | 2008 <sup>c</sup> | LGV-M.2           | ***              | 4.7     | 4.4  | 0.0                       | ChFaM106-144 <sup>b</sup>      | 63.9                            | 1.00             | Ln      |
| <i>60V-1</i>          |                   | 2009 <sup>c</sup> | LGV-M.1           | ***              | 5.1     | 3.8  | 39.4                      | UDF034-155 (47.7)              | 30.3                            | 0.82             | Ln      |
| Octyl acetate         | <i>63VI-1</i>     | 2007              | LGVI-F.1          | ****             | 5.3     | 10.7 | 15.7                      | ChFaM001-230/235 <sup>b</sup>  | 40.9                            | 0.95             | Ln      |
|                       |                   | 2007              | LGVI-M.1          | ****             | 5.3     | 10.7 | 16.5                      | ChFaM001-230/235 <sup>b</sup>  | 40.9                            | 0.95             | Ln      |
|                       |                   | 2008              | LGVI-F.1          | ****             | 5.5     | 10.9 | 12.0                      | ChFaM001-230/235 (15.7)        | 52.4                            | 0.83             | Ln      |
|                       |                   | 2008              | LGVI-M.1          | ****             | 5.3     | 10.9 | 12.0                      | ChFaM001-230/235 (16.5)        | 53.8                            | 0.80             | Ln      |
|                       |                   | 2009              | LGVI-F.1          | ****             | 7.4     | 18.3 | 9.0                       | ChFaM001-230/235 (15.7)        | 72.6                            | 0.75             | Ln      |
|                       |                   | 2009              | LGVI-M.1          | ****             | 7.5     | 18.3 | 9.0                       | ChFaM001-230/235 (16.5)        | 72.8                            | 0.72             | Ln      |
| Nonyl acetate         | <i>71VI-1</i>     | 2008 <sup>c</sup> | LGVI-F.1          | -                | 4.0     | 3.3  | 15.7                      | ChFaM001-230/235 <sup>b</sup>  | 15.8                            | 0.95             | Ln      |
|                       |                   | 2008 <sup>c</sup> | LGVI-M.1          | -                | 4.1     | 3.3  | 16.5                      | ChFaM001-230/235 <sup>b</sup>  | 15.8                            | 0.95             | Ln      |
|                       |                   | 2009              | LGVI-F.1          | ****             | 3.9     | 6.7  | 12.0                      | ChFaM001-230/235 (15.7)        | 33.2                            | 0.83             | Ln      |
|                       |                   | 2009              | LGVI-M.1          | ****             | 4.1     | 6.7  | 12.0                      | ChFaM001-230/235 (16.5)        | 34.2                            | 0.80             | Ln      |
| Methyl decanoate      | <i>72III-6</i>    | 2007 <sup>c</sup> | LGIII-M.6         | *                | 6.4     | 5.9  | 22.2                      | ChFaM009-558 <sup>b</sup>      | 55.5                            | 0.35             | SQRT    |
|                       |                   | 2009              | LGIII-M.6         | -                | 4.5     | 4.6  | 0.0                       | ChFaM159-257 <sup>b</sup>      | 57.4                            | 0.32             | SQRT    |

| Volatile                | QTL            | Year              | LG        | K-W <sup>a</sup> | Thresh. | LOD  | Position | Closest marker                | R <sup>2</sup> (%) <sup>d</sup> | GIC <sup>c</sup> | Transf. |
|-------------------------|----------------|-------------------|-----------|------------------|---------|------|----------|-------------------------------|---------------------------------|------------------|---------|
|                         | <i>72IV-1</i>  | 2007              | LGIV-F.1a | ***              | 6.5     | 8.8  | 64.9     | EMFvi136-154 <sup>b</sup>     | 61.9                            | 1.00             | SQRT    |
|                         |                | 2009              | LGIV-F.1a | ***              | 4.4     | 5.0  | 66.4     | ChFvM232-188 <sup>b</sup>     | 43.7                            | 0.99             | SQRT    |
| (-)-myrtenyl acetate    | <i>73I-2</i>   | 2008 <sup>c</sup> | LGI-F.2   | -                | 4.7     | 4.2  | 7.6      | UDF002-129 <sup>b</sup>       | 28.3                            | 1.00             | -       |
|                         |                | 2009              | LGI-F.2   | ***              | 8.8     | 10.1 | 6.5      | ChFvM191-204 <sup>b</sup>     | 64                              | 1.00             | -       |
| Hexyl hexanoate         | <i>75III-2</i> | 2008              | LGIII-F.2 | **               | 4.1     | 4.2  | 43.7     | ChFvM234-174 <sup>b</sup>     | 21.2                            | 1.00             | SQRT    |
| Octyl butanoate         | <i>76VI-1</i>  | 2007              | LGVI-F.1  | ****             | 5.3     | 5.9  | 15.7     | ChFaM001-230/235 <sup>b</sup> | 25.4                            | 0.95             | Ln      |
|                         |                | 2007              | LGVI-M.1  | ****             | 5.1     | 5.9  | 16.5     | ChFaM001-230/235 <sup>b</sup> | 25.4                            | 0.95             | Ln      |
|                         |                | 2008              | LGVI-F.1  | ****             | 4.9     | 5.3  | 21.5     | ChFvM205-133/114 <sup>b</sup> | 23.6                            | 1.00             | Ln      |
|                         |                | 2008              | LGVI-M.1  | ****             | 5       | 5.4  | 22.5     | ChFvM205-133/116 <sup>b</sup> | 24.7                            | 1.00             | Ln      |
|                         |                | 2009              | LGVI-F.1  | ****             | 6.5     | 10.7 | 9.0      | ChFaM001-230/235 (15.7)       | 61.2                            | 0.73             | Ln      |
|                         |                | 2009              | LGVI-M.1  | ****             | 6.5     | 10.7 | 9.0      | ChFaM001-230/235 (16.5)       | 61.8                            | 0.72             | Ln      |
| Ethyl decanoate         | <i>77III-1</i> | 2009              | LGIII-F.1 | ****             | 4.1     | 4.2  | 4.2      | caa/aac-278 <sup>b</sup>      | 20.4                            | 0.90             | Ln      |
|                         |                | 2009              | LGIII-M.1 | ****             | 4.1     | 4.1  | 8.7      | caa/aac-139 <sup>b</sup>      | 18.7                            | 0.90             | Ln      |
| 1-methyloctyl butanoate | <i>78IV-3</i>  | 2009              | LGIV-F.3  | *                | 4.3     | 4.9  | 17.2     | caa/aaa-350 <sup>b</sup>      | 48.9                            | 1.00             | Ln      |
| Decyl acetate           | <i>79VI-1</i>  | 2007 <sup>c</sup> | LGVI-F.1  | ****             | 8.9     | 7.6  | 15.7     | ChFaM001-230/235 <sup>b</sup> | 31.3                            | 0.95             | Ln      |
|                         |                | 2007 <sup>c</sup> | LGVI-M.1  | ****             | 8.7     | 7.6  | 16.5     | ChFaM001-230/235 <sup>b</sup> | 31.3                            | 0.95             | Ln      |
|                         |                | 2008              | LGVI-F.1  | ****             | 4.9     | 8.7  | 15.0     | ChFaM001-230/235 (15.7)       | 37.3                            | 0.93             | Ln      |
|                         |                | 2008              | LGVI-M.1  | ****             | 4.9     | 8.7  | 12.0     | ChFaM001-230/235 (16.5)       | 46.7                            | 0.80             | Ln      |
|                         |                | 2009              | LGVI-F.1  | ****             | 6.8     | 20.8 | 9.0      | ChFaM001-230/235 (15.7)       | 81.6                            | 0.75             | Ln      |
|                         |                | 2009              | LGVI-M.1  | ****             | 6.9     | 20.9 | 9.0      | ChFaM001-230/235 (16.5)       | 81.8                            | 0.72             | Ln      |
|                         | <i>79III-6</i> | 2009              | LGIII-F.6 | -                | 6.8     | 7.2  | 18.0     | cca/agt-475 (23.5)            | 75.7                            | 0.76             | Ln      |
| Cinnamyl acetate        | <i>81VI-1</i>  | 2007 <sup>c</sup> | LGVI-F.1  | ***              | 6.9     | 6.0  | 22.3     | ChFaM163-130 <sup>b</sup>     | 26.1                            | 1.00             | Ln      |
|                         |                | 2008              | LGVI-F.1  | ****             | 5.1     | 5.9  | 21.5     | ChFvM205-133/114 <sup>b</sup> | 26.2                            | 1.00             | Ln      |
|                         |                | 2008              | LGVI-M.1  | ****             | 5       | 5.9  | 22.5     | ChFvM205-133/116 <sup>b</sup> | 26.5                            | 1.00             | Ln      |
|                         |                | 2009              | LGVI-F.1  | ****             | 4.4     | 11.3 | 18.7     | Fvi20-166/0 (19.1)            | 43.8                            | 0.98             | SQRT    |
|                         |                | 2009              | LGVI-M.1  | ****             | 4.4     | 11.3 | 19.5     | Fvi20-164/0 (20.1)            | 44.1                            | 0.97             | SQRT    |
| Octyl hexanoate         | <i>85VI-1</i>  | 2007 <sup>c</sup> | LGVI-F.1  | ****             | 5.5     | 5.1  | 15.7     | ChFaM001-230/235 <sup>b</sup> | 22                              | 0.95             | Ln      |
|                         |                | 2007 <sup>c</sup> | LGVI-M.1  | ****             | 5.4     | 5.1  | 16.5     | ChFaM001-230/235 <sup>b</sup> | 22                              | 0.95             | Ln      |
|                         |                | 2008              | LGVI-F.1  | ****             | 4.6     | 5.4  | 21.5     | ChFvM205-133/114 <sup>b</sup> | 24.3                            | 1.00             | Ln      |
|                         |                | 2008              | LGVI-M.1  | ****             | 4.8     | 5.6  | 22.5     | ChFvM205-133/116 <sup>b</sup> | 25.4                            | 1.00             | Ln      |
|                         |                | 2009              | LGVI-F.1  | ****             | 5.8     | 9.9  | 9.0      | ChFaM001-230/235 (15.7)       | 59.4                            | 0.75             | Ln      |
|                         |                | 2009              | LGVI-M.1  | ****             | 5.7     | 10   | 9.0      | ChFaM001-230/235 (16.5)       | 60.1                            | 0.72             | Ln      |

<sup>a</sup>Significance level of Kruskal-Wallis test. \*, p<0.005; \*\*, p<0.001; \*\*\*, p<0.0005; \*\*\*\*, p<0.0001.

<sup>b</sup>Marker in LOD peak.

<sup>c</sup>QTL detected below the threshold or just by one method.

<sup>d</sup>Percentage of the variance explained by the QTL.

<sup>e</sup>Genotypic information coefficient for the F or M parental line.



**Supplemental Table S3.** QTLs detected in the ‘232’ × ‘1392’ strawberry population controlling the content of alcohols and terpene alcohols based on Kruskal-Wallis (K-W) and interval mapping (IM). The position of the LOD peak (in cM) and the most closely associated marker locus is indicated. Those QTLs identified in two or all three years are indicated in bold.

| Volatile         | QTL            | Year              | Location  | K-W  | Thr. | LOD | Position | Closest marker                | R <sup>2</sup> (%) <sup>d</sup> | GIC <sup>e</sup> | Transf. |
|------------------|----------------|-------------------|-----------|------|------|-----|----------|-------------------------------|---------------------------------|------------------|---------|
| (E)-2-hexen-1-ol | <b>17III-1</b> | 2008              | LGIII-F.1 | **** | 4    | 4.7 | 7.1      | caa/aac-139 <sup>b</sup>      | 21.6                            | 0.93             | SQRT    |
|                  |                | 2008              | LGIII-M.1 | **** | 4.1  | 4.8 | 8.7      | caa/aac-139 <sup>b</sup>      | 22.8                            | 0.90             | SQRT    |
| 1-hexanol        | <b>18III-1</b> | 2008              | LGIII-F.1 | **** | 4.2  | 4.8 | 7.0      | UDF004-150 <sup>b</sup>       | 21.7                            | 0.93             | SQRT    |
|                  |                | 2008              | LGIII-M.1 | **** | 4.1  | 4.9 | 8.7      | caa/aac-139 <sup>b</sup>      | 22.2                            | 0.90             | SQRT    |
| 2-heptanol       | <b>24V-2</b>   | 2008              | LGIV-M.2  | **** | 5.4  | 6.8 | 0.0      | ChFaM106-144 <sup>b</sup>     | 68.5                            | 1.00             | Ln      |
| 1-octanol        | <b>50VI-1</b>  | 2007              | LGVI-F.1  | **** | 4.1  | 5.3 | 15.7     | ChFaM001-230/235 <sup>b</sup> | 22.9                            | 0.95             | Ln      |
|                  |                | 2007              | LGVI-M.1  | **** | 4.3  | 5.3 | 16.5     | ChFaM001-230/235 <sup>b</sup> | 22.9                            | 0.95             | Ln      |
|                  |                | 2008              | LGVI-F.1  | ***  | 4.3  | 4.3 | 15.0     | ChFaM001-230/235 (15.7)       | 20.3                            | 0.93             | 1/SQRT  |
|                  |                | 2008              | LGVI-M.1  | ***  | 4.2  | 4.3 | 16.5     | ChFaM001-230/235 <sup>b</sup> | 19.6                            | 0.95             | 1/SQRT  |
|                  |                | 2009              | LGVI-F.1  | **** | 4.2  | 6.4 | 15.7     | ChFaM001-230/235 <sup>b</sup> | 27.4                            | 0.95             | Ln      |
|                  |                | 2009              | LGVI-M.1  | **** | 4.3  | 6.4 | 16.5     | ChFaM001-230/235 <sup>b</sup> | 27.3                            | 0.95             | Ln      |
|                  |                | 2008              | LGVI-M.2  | ***  | 4.2  | 4.4 | 6.1      | ChFaM044-226 <sup>b</sup>     | 38.8                            | 1.00             | 1/SQRT  |
|                  |                | 2009              | LGVII-F.3 | ***  | 4.2  | 4.2 | 24.2     | CHI-520/550 <sup>b</sup>      | 18.8                            | 0.82             | Ln      |
| 1-decanol        | <b>70VI-1</b>  | 2008 <sup>c</sup> | LGVI-F.1  | ***  | 9.9  | 9.5 | 0.0      | cca/agt-900 <sup>b</sup>      | 74.6                            | 0.64             | Ln      |
|                  |                | 2008 <sup>c</sup> | LGVI-M.1  | ***  | 10   | 9.6 | 0.0      | cca/agt-900 <sup>b</sup>      | 74.7                            | 0.64             | Ln      |
|                  |                | 2009              | LGVI-F.1  | **** | 4.1  | 5.2 | 9.0      | ChFaM001-230/235 (15.7)       | 29.5                            | 0.75             | Ln      |
|                  |                | 2009              | LGVI-M.1  | **** | 4.2  | 5.2 | 9.0      | ChFaM001-230/235 (16.5)       | 30.1                            | 0.72             | Ln      |
|                  | <b>70IV-2</b>  | 2009              | LGIV-M.2  | -    | 4.2  | 4.8 | 5.8      | cca/agg-630 <sup>b</sup>      | 47.7                            | 0.98             | Ln      |
| Eugenol          | <b>74I-2</b>   | 2009              | LGI-F.2   | ***  | 4.5  | 4.5 | 25.1     | ChFaM083-S1/S2 <sup>b</sup>   | 20.3                            | 0.99             | Ln      |
|                  |                | 2009              | LGI-M.2   | **   | 4.5  | 5.1 | 2.9      | EMFn182-186 <sup>b</sup>      | 26.2                            | 1.00             | Ln      |
|                  | <b>74V-2</b>   | 2008 <sup>c</sup> | LGVI-M.2  | ***  | 4.8  | 3.7 | 0.0      | ChFaM106-144 <sup>b</sup>     | 20.5                            | 1.00             | Ln      |
|                  |                | 2009 <sup>c</sup> | LGVI-M.2  | **   | 4.5  | 2.9 | 0.0      | ChFaM106-144 <sup>b</sup>     | 21.4                            | 1.00             | Ln      |
| Linalool         | <b>54VI-1</b>  | 2007 <sup>c</sup> | LGVI-F.1  | *    | 4.5  | 3.2 | 15.7     | ChFaM001-230/235 <sup>b</sup> | 14.5                            | 0.95             | -       |
|                  |                | 2007 <sup>c</sup> | LGVI-M.1  | *    | 4.6  | 3.2 | 16.5     | ChFaM001-230/235 <sup>b</sup> | 14.5                            | 0.95             | -       |
|                  |                | 2008              | LGVI-F.1  | **** | 4.1  | 5.1 | 9.0      | ChFaM001-230/235 (15.7)       | 33.7                            | 0.75             | Ln      |
|                  |                | 2008              | LGVI-M.1  | **** | 4.2  | 5.1 | 12.0     | ChFaM001-230/235 (16.5)       | 31.5                            | 0.79             | Ln      |
|                  |                | 2009              | LGVI-M.2  | **** | 4.1  | 4.8 | 9.7      | cct/atg-750 <sup>b</sup>      | 30.3                            | 1.00             | Ln      |
| Terpineol        | <b>65I-2</b>   | 2007              | LGI-F.2   | -    | 4    | 4.5 | 25.1     | ChFaM083-S1/S2 <sup>b</sup>   | 19.9                            | 1.00             | Ln      |
|                  |                | 2007              | LGI-M.2   | *    | 4.1  | 4.5 | 2.9      | EMFn182-186 <sup>b</sup>      | 20.3                            | 1.00             | Ln      |
|                  |                | 2008              | LGI-F.2   | *    | 4.4  | 5.3 | 20.7     | F3H-S2 (23.9)                 | 32.1                            | 0.85             | SQRT    |
|                  |                | 2008              | LGI-M.2   | *    | 4.3  | 5.0 | 0.0      | F3H-S2 <sup>b</sup>           | 23                              | 1.00             | SQRT    |
|                  |                | 2009              | LGI-F.2   | ***  | 4    | 4.9 | 23.7     | F3H-S2 (23.9)                 | 25.3                            | 0.95             | Ln      |
|                  |                | 2009              | LGI-M.2   | ***  | 4    | 4.9 | 0.0      | F3H-S2 <sup>b</sup>           | 22.2                            | 1.00             | Ln      |
|                  | <b>65VI-1</b>  | 2008 <sup>c</sup> | LGVI-F.1  | *    | 4.4  | 4.3 | 6.0      | cca/agt-900 (0.0)             | 28                              | 0.70             | SQRT    |
|                  |                | 2008              | LGVI-M.1  | *    | 4.3  | 4.3 | 6.0      | cca/agt-900 (0.0)             | 28.6                            | 0.67             | SQRT    |
|                  | <b>65VI-2</b>  | 2007              | LGVI-M.2  | *    | 4.1  | 5.0 | 13.7     | cct/aca-151 (10.7)            | 40.7                            | 0.90             | Ln      |
|                  |                | 2008              | LGVI-M.2  | **** | 4.3  | 5.8 | 13.7     | cct/aca-151 (10.7)            | 39.9                            | 0.90             | SQRT    |
|                  |                | 2009              | LGVI-M.2  | **** | 4    | 5.5 | 9.7      | cct/atg-750 <sup>b</sup>      | 25.7                            | 1.00             | Ln      |
| Myrtenol         | <b>66I-2</b>   | 2007 <sup>c</sup> | LGI-F.2   | ***  | 5.8  | 4.1 | 28.6     | F3H-S4 (25.6)                 | 24.9                            | 0.60             | 1/SQRT  |
|                  |                | 2008              | LGI-F.2   | *    | 4.1  | 4.4 | 7.6      | UDF002-129 <sup>b</sup>       | 48.7                            | 1.00             | Ln      |
|                  |                | 2009              | LGI-F.2   | -    | 4.2  | 4.2 | 5.6      | UDF002-129 <sup>b</sup>       | 47.9                            | 1.00             | Ln      |
| Nerolidol        | <b>84IV-1</b>  | 2007              | LGIV-F.1a | **** | 4.3  | 5.5 | 21.6     | BFACT037-198 <sup>b</sup>     | 35.6                            | 1.00             | SQRT    |
|                  |                | 2007 <sup>c</sup> | LGIV-M.1b | **** | 4.4  | 4.1 | 0.0      | ChFaM014-141 <sup>b</sup>     | 18.2                            | 0.98             | SQRT    |
|                  |                | 2008              | LGIV-F.1a | **** | 4.8  | 6.0 | 71.4     | ChFvM087-224 <sup>b</sup>     | 67                              | 1.00             | SQRT    |
|                  |                | 2008              | LGIV-M.1b | **** | 5.1  | 5.5 | 0.0      | ChFaM014-141 <sup>b</sup>     | 34.2                            | 0.98             | SQRT    |

<sup>a</sup>Significance level of Kruskal-Wallis test. \*, p<0.005; \*\*, p<0.001; \*\*\*, p<0.0005; \*\*\*\*, p<0.0001.

<sup>b</sup>Marker in LOD peak.

<sup>c</sup>QTL detected below the threshold or just by one method.

<sup>d</sup>Percentage of the variance explained by the QTL.

<sup>e</sup>Genotypic information coefficient for the F or M parental line.

**Supplemental Table S4.** QTLs detected in the ‘232’ × ‘1392’ strawberry population controlling the content of aldehydes, ketones and furans based on Kruskal-Wallis (K-W) and interval mapping (IM). The position of the LOD peak (in cM) and the most closely associated marker locus is indicated. Those QTLs identified in two or all three years are indicated in bold.

| Volatile                | QTL            | Year              | Location   | K-W  | Thr. | LOD                      | Position    | Closest marker                         | R <sup>2</sup> (%) <sup>d</sup> | GIC <sup>e</sup> | Transf.       |
|-------------------------|----------------|-------------------|------------|------|------|--------------------------|-------------|----------------------------------------|---------------------------------|------------------|---------------|
| (E)-2-pentenal          | <i>09III-2</i> | 2009              | LGIII-M.2  | ***  | 4    | 6.7                      | 57.1        | ChFvM140-114 <sup>b</sup>              | 44.5                            | 1.00             | 1/SQRT        |
| Heptanal                | <i>25V-4</i>   | 2009              | LGIV-M.4   | **   | 3.8  | 4                        | 53.1        | ChFaM269-445 <sup>b</sup>              | 37.1                            | 1.00             | Ln            |
| (E)-2-heptenal          | <i>29III-2</i> | 2008 <sup>c</sup> | LGIII-M.2  | -    | 4.2  | <b>4.02</b>              | <b>54.0</b> | <b>BFACT045-175<sup>b</sup></b>        | <b>31.5</b>                     | <b>1.00</b>      | -             |
|                         |                | 2009              | LGIII-M.2  | **** | 4.7  | <b>8.3</b>               | <b>57.1</b> | <b>ChFvM140-114<sup>b</sup></b>        | <b>73.9</b>                     | <b>1.00</b>      | -             |
|                         | <i>29VII-2</i> | 2009              | LGVII-F.2  | ***  | 4.7  | 4.9                      | 8.1         | caa/aac-177 <sup>b</sup>               | 22.0                            | 0.38             | -             |
|                         |                | 2009              | LGVII-M.2  | ***  | 4.7  | 5.1                      | 55.0        | caa/aac-177 <sup>b</sup>               | 23.1                            | 0.72             | -             |
| Benzaldehyde            | <i>31IV-6</i>  | 2008              | LGIV-F.6   | ***  | 4    | 6.2                      | 7.1         | ChFvM232-183 (8.6)                     | 33.6                            | 0.91             | Ln            |
| (E)-2-octenal           | <i>49III-2</i> | 2009 <sup>c</sup> | LGIII-M.2  | ***  | 4.2  | 4.1                      | 55.6        | γ-decalactone <sup>b</sup>             | 35.2                            | 1.00             | 1/SQRT        |
| Nonanal                 | <i>55IV-1</i>  | 2007              | LGIV-F.1a  | -    | 4.1  | 4.7                      | 64.9        | EMFvi136-154 <sup>b</sup>              | 49.7                            | 1.00             | -             |
| (E)-2-decenal           | <i>69III-2</i> | 2009              | LGII-M.2   | **** | 3.9  | 4.4                      | 57.1        | ChFvM140-114 <sup>b</sup>              | 21.5                            | 1.00             | Ln            |
| 1-penten-3-one          | <i>05III-1</i> | 2008 <sup>c</sup> | LGIII-F.1  | *    | 4    | <b>3.4</b>               | <b>44.7</b> | <b>PBCESSRFa12-212/214<sup>b</sup></b> | <b>15.8</b>                     | <b>1.00</b>      | <b>SQRT</b>   |
|                         |                | 2008 <sup>c</sup> | LGIII-M.1  | *    | 3.9  | 3.6                      | 41.7        | <b>PBCESSRFa12-212/206 (38.7)</b>      | <b>18.9</b>                     | <b>0.88</b>      | <b>SQRT</b>   |
|                         |                | 2009              | LGIII-F.1  | **   | 4    | 4.1                      | 19.1        | <b>BFACT036-159/130 (22.6)</b>         | <b>22.5</b>                     | <b>0.86</b>      | <b>1/SQRT</b> |
|                         |                | 2009              | LGIII-M.1  | **   | 4.1  | 4.1                      | <b>24.3</b> | <b>BFACT036-159/135<sup>b</sup></b>    | <b>18.4</b>                     | <b>1.00</b>      | <b>1/SQRT</b> |
|                         | <i>05III-2</i> | 2009              | LGIII-M.2  | *    | 4.1  | 5.1                      | 57.1        | ChFvM140-114 <sup>b</sup>              | 39.8                            | 1.00             | 1/SQRT        |
| 2-heptanone             | <i>21III-1</i> | 2008              | LGIII-M.1  | ***  | 4    | 4.0                      | 0.0         | ChFaM112-178 <sup>b</sup>              | 21.7                            | 0.78             | SQRT          |
| 6-methyl-5-hepten-2-one | <i>32VI-1</i>  | 2007              | LGVI-F.1   | *    | 4.5  | 5.3                      | 0.0         | cca/agt-900 <sup>b</sup>               | 51.5                            | 0.64             | -             |
|                         |                | 2007              | LGVI-M.1   | *    | 4.4  | 5.3                      | 0.0         | cca/agt-900 <sup>b</sup>               | 51.7                            | 0.64             | -             |
|                         |                | 2008 <sup>c</sup> | LGVI-F.1   | -    | 5.5  | 4.3                      | 0.0         | cca/agt-900 <sup>b</sup>               | 49.7                            | 0.64             | -             |
|                         |                | 2008 <sup>c</sup> | LGVI-M.1   | -    | 5.4  | 4.3                      | 0.0         | cca/agt-900 <sup>b</sup>               | 50.1                            | 0.64             | -             |
|                         |                | 2009              | LGVI-F.1   | -    | 5.1  | 7.3                      | 0.0         | cca/agt-900 <sup>b</sup>               | 56.9                            | 0.64             | -             |
|                         |                | 2009              | LGVI-M.1   | *    | 5    | 7.3                      | 0.0         | cca/agt-900 <sup>b</sup>               | 57.0                            | 0.64             | -             |
| 2-nonanone              | <i>52III-1</i> | 2008              | LGIII-F.1  | **** | 4.2  | 4.3                      | 4.2         | caa/aac-278 <sup>b</sup>               | 21.0                            | 1.00             | Ln            |
|                         |                | 2008              | LGIII-M.1  | **** | 4.2  | 5.0                      | 0.0         | ChFaM112-178 <sup>b</sup>              | 30.7                            | 0.78             | Ln            |
|                         | <i>52III-6</i> | 2007              | LGIII-F.6  | *    | 4.1  | 4.3                      | 26.5        | ChFaM009-558 (27.9)                    | 25.7                            | 0.69             | Ln            |
| Mesifurane              | <i>48VII-2</i> | 2007              | LGVII-F.2  | **** | 4.8  | 11.1                     | 18.3        | Mesifurane <sup>b</sup>                | 42.0                            | 0.45             | SQRT          |
|                         |                | 2007              | LGVII-M.2  | **** | 4.8  | 11.1                     | 65.1        | Mesifurane <sup>b</sup>                | 42.0                            | 0.45             | SQRT          |
|                         |                | 2008              | LGVII-F.2  | **** | 4.2  | 15.4                     | 18.3        | Mesifurane <sup>b</sup>                | 55.6                            | 0.45             | SQRT          |
|                         |                | 2008              | LGVII-M.2  | **** | 4.3  | 15.4                     | 65.1        | Mesifurane <sup>b</sup>                | 55.6                            | 0.45             | SQRT          |
|                         |                | 2009              | LGVII-F.2  | **** | 4.8  | 21.3                     | 13.8        | ChFaM160-187 <sup>b</sup>              | 67.3                            | 0.44             | SQRT          |
|                         |                | 2009              | LGVII-M.2  | **** | 4.6  | 21.4                     | 60.7        | ChFaM160-187 <sup>b</sup>              | 67.3                            | 0.44             | SQRT          |
| γ-decalactone           | <i>82III-2</i> | 2007              | LGIII-M.2  | **** | 13.4 | 26                       | 54.0        | BFACT045-175 <sup>b</sup>              | 84.4                            | 1.00             | -             |
|                         |                | 2008              | LGIII-M.2  | **** | 7.4  | 21.5                     | 51.1        | BFACT045-175 (54.0)                    | 92.8                            | 0.90             | -             |
|                         |                | 2009              | LGIII-M.2  | **** | 14.1 | 29.6                     | 51.1        | BFACT045-175 (54.0)                    | 90.0                            | 0.90             | -             |
| γ-dodecalactone         | <i>87III-1</i> | 2009              | LGIII-F.1  | ***  | 4.3  | 4.7                      | 7.1         | caa/aac-139 <sup>b</sup>               | 22.8                            | 0.93             | Ln            |
|                         |                | 2009              | LGIII-M.1  | ***  | 4.3  | 4.8                      | 8.7         | caa/aac-139 <sup>b</sup>               | 24.3                            | 0.90             | Ln            |
|                         | <i>87VII-1</i> | 2007              | LGVII-F.1c | **** | 5.5  | 8.1                      | 6.0         | EMFv021-196 (0.0)                      | 67.7                            | 0.78             | Ln            |
|                         |                | 2008              | LGVII-F.1c | **** | 4    | 4.2                      | 9.0         | EMFv021-196 (0.0)                      | 32.0                            | 0.71             | SQRT          |
| 2009                    | LGVII-F.1c     | ****              | 4.3        | 8.5  | 0.0  | EMFv021-196 <sup>b</sup> | 50.9        | 1.00                                   | Ln                              |                  |               |

<sup>a</sup>Significance level of Kruskal-Wallis test. \*, p<0.005; \*\*, p<0.001; \*\*\*, p<0.0005; \*\*\*\*, p<0.0001.

<sup>b</sup>Marker in LOD peak.

<sup>c</sup>QTL detected below the threshold or just by one method.

<sup>d</sup>Percentage of the variance explained by the QTL.

<sup>e</sup>Genotypic information coefficient for the F or M parental line.
